# Supplementary material for: Furan-2-carbaldehydes as C1 building blocks for the synthesis of quinazolin-4(3H)-ones via ligand-free photocatalytic C–C bond cleavage
Source: Royal Society of Chemistry journal article supplement (doi:10.1039/c8gc00079d), 2018-01-01

Sample\_id = YWJ7008  
Filename = NMR-2017-04174C-2.jdf  
Creation\_time = 24-JUL-2017 11:01:30  
Site = ECA400  
Experiment = single\_pulse\_dec  
X\_domain = 13C  
Scans = 557  
Temp\_get = 18[dC]  
Solvent = CHLOROFORM-D

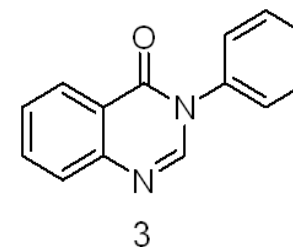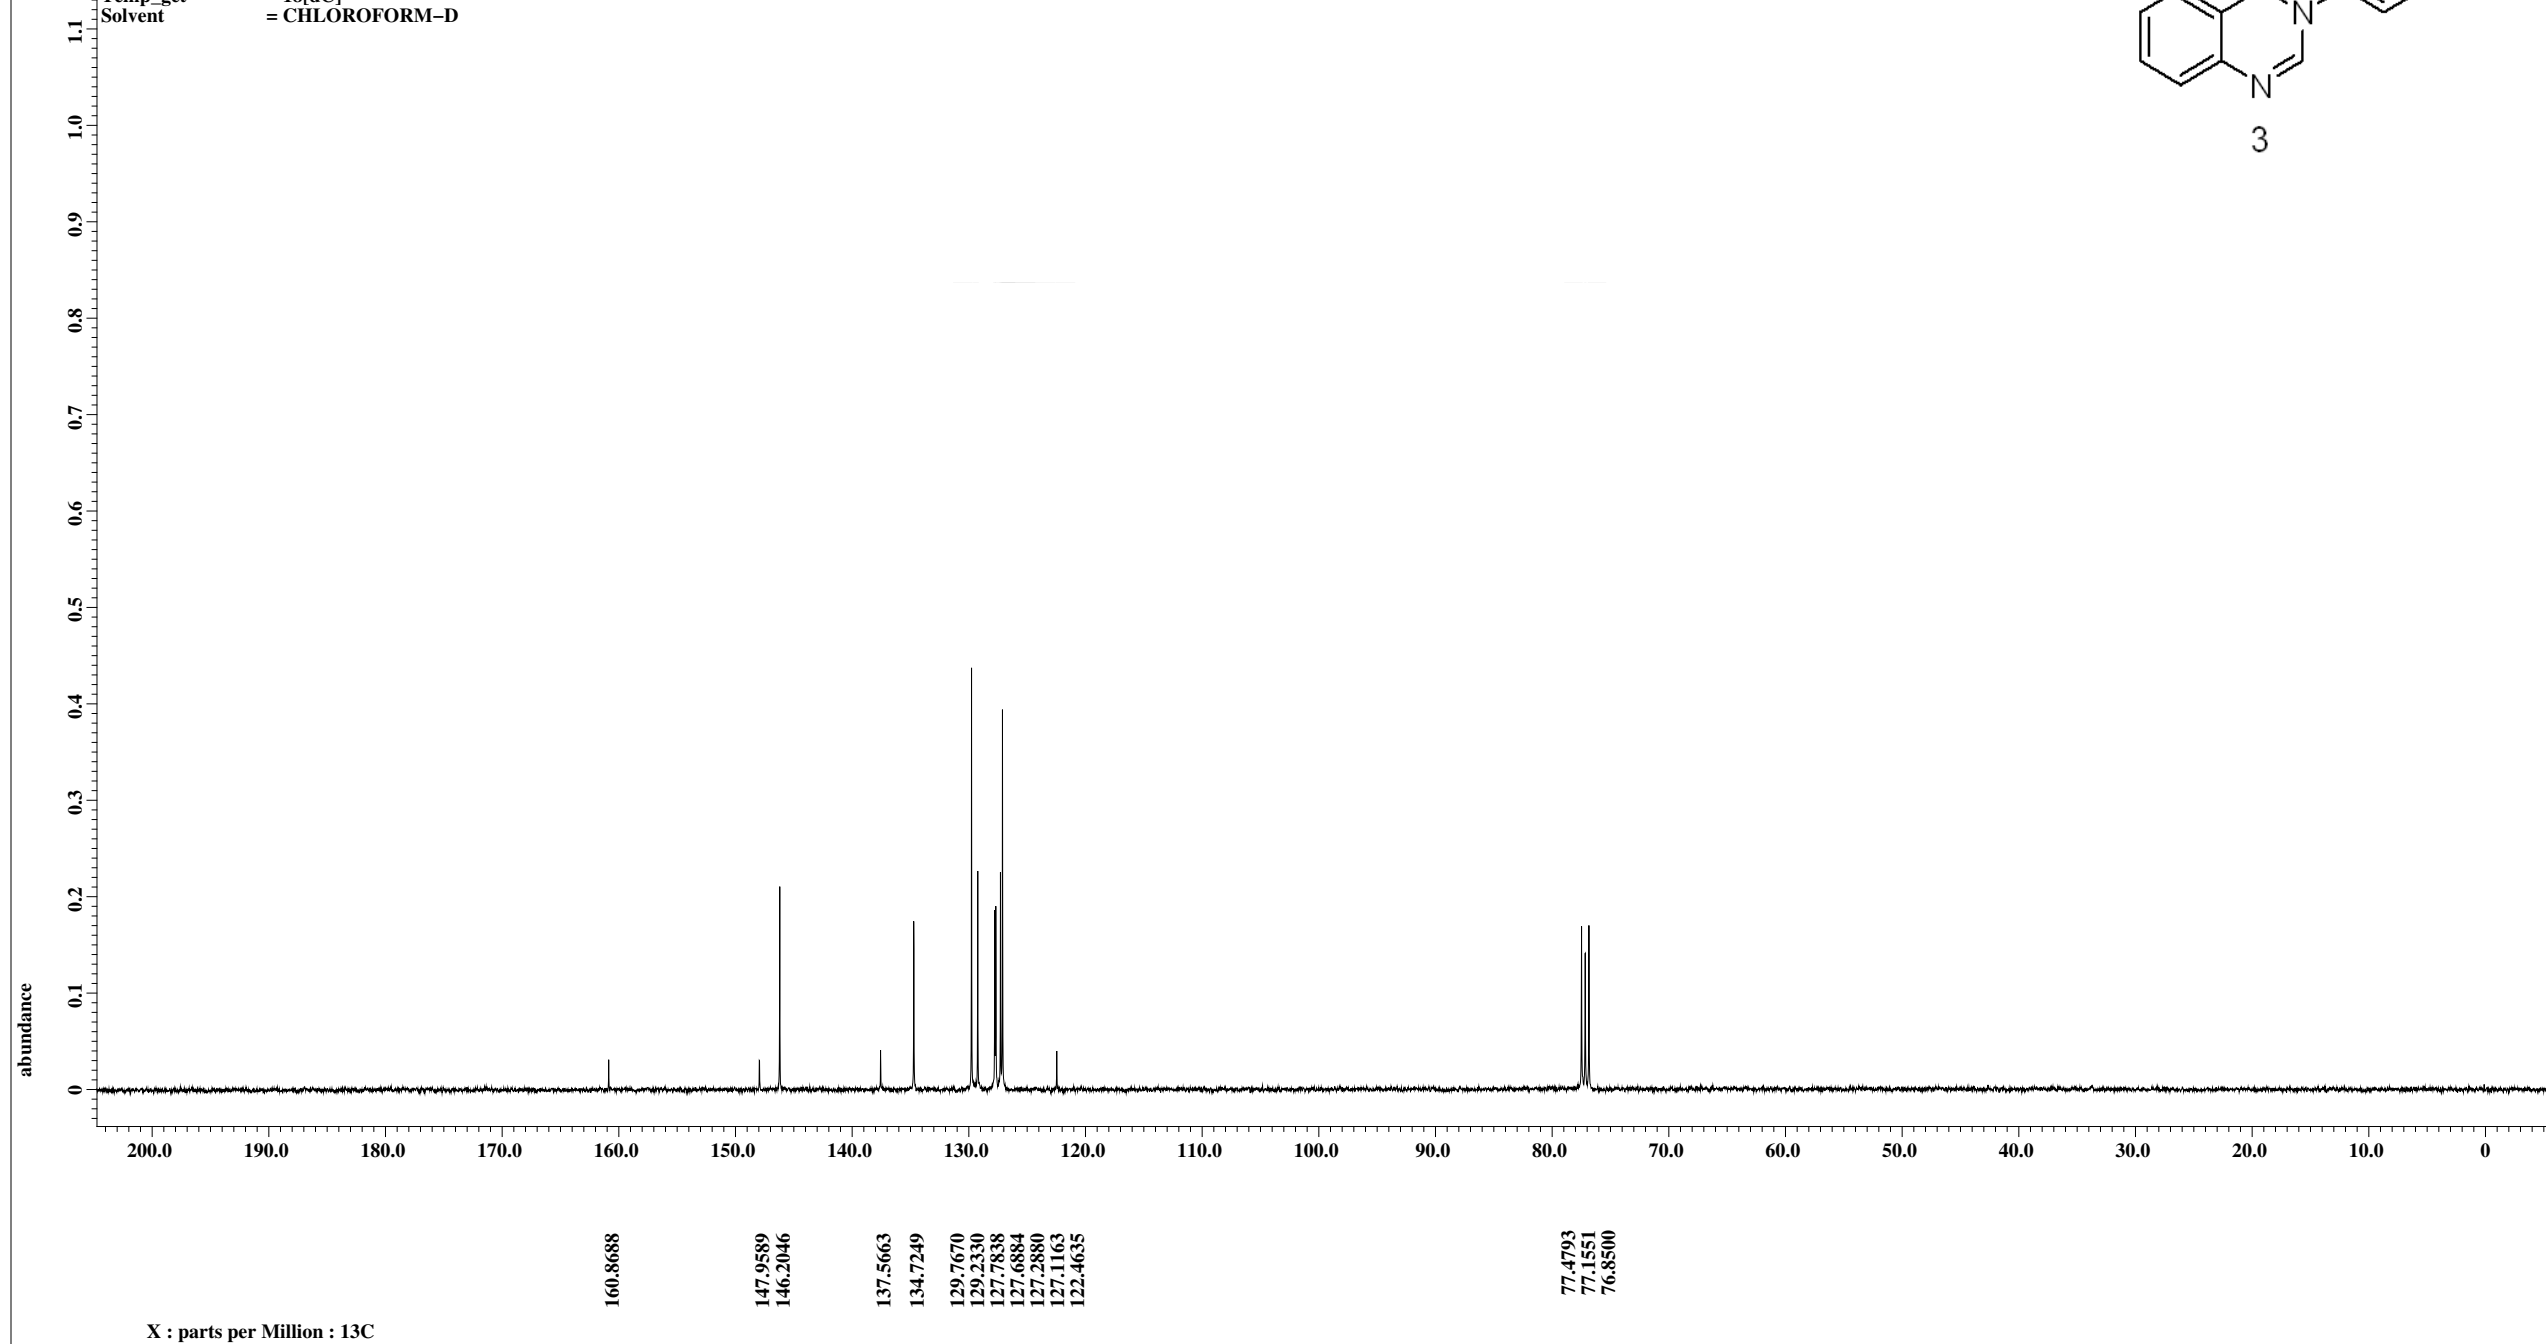

Sample\_id = YWJ1101  
Filename = NMR-2017-03293C-13.jdf  
Creation\_time = 5-JUN-2017 15:23:45  
Site = ECA400  
Experiment = single\_pulse\_dec  
X\_domain = 13C  
Scans = 927  
Temp\_get = 20.2[dC]  
Solvent = CHLOROFORM-D

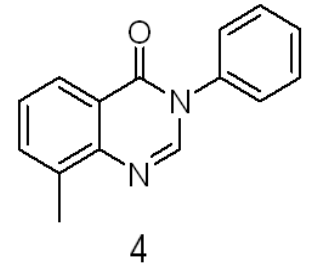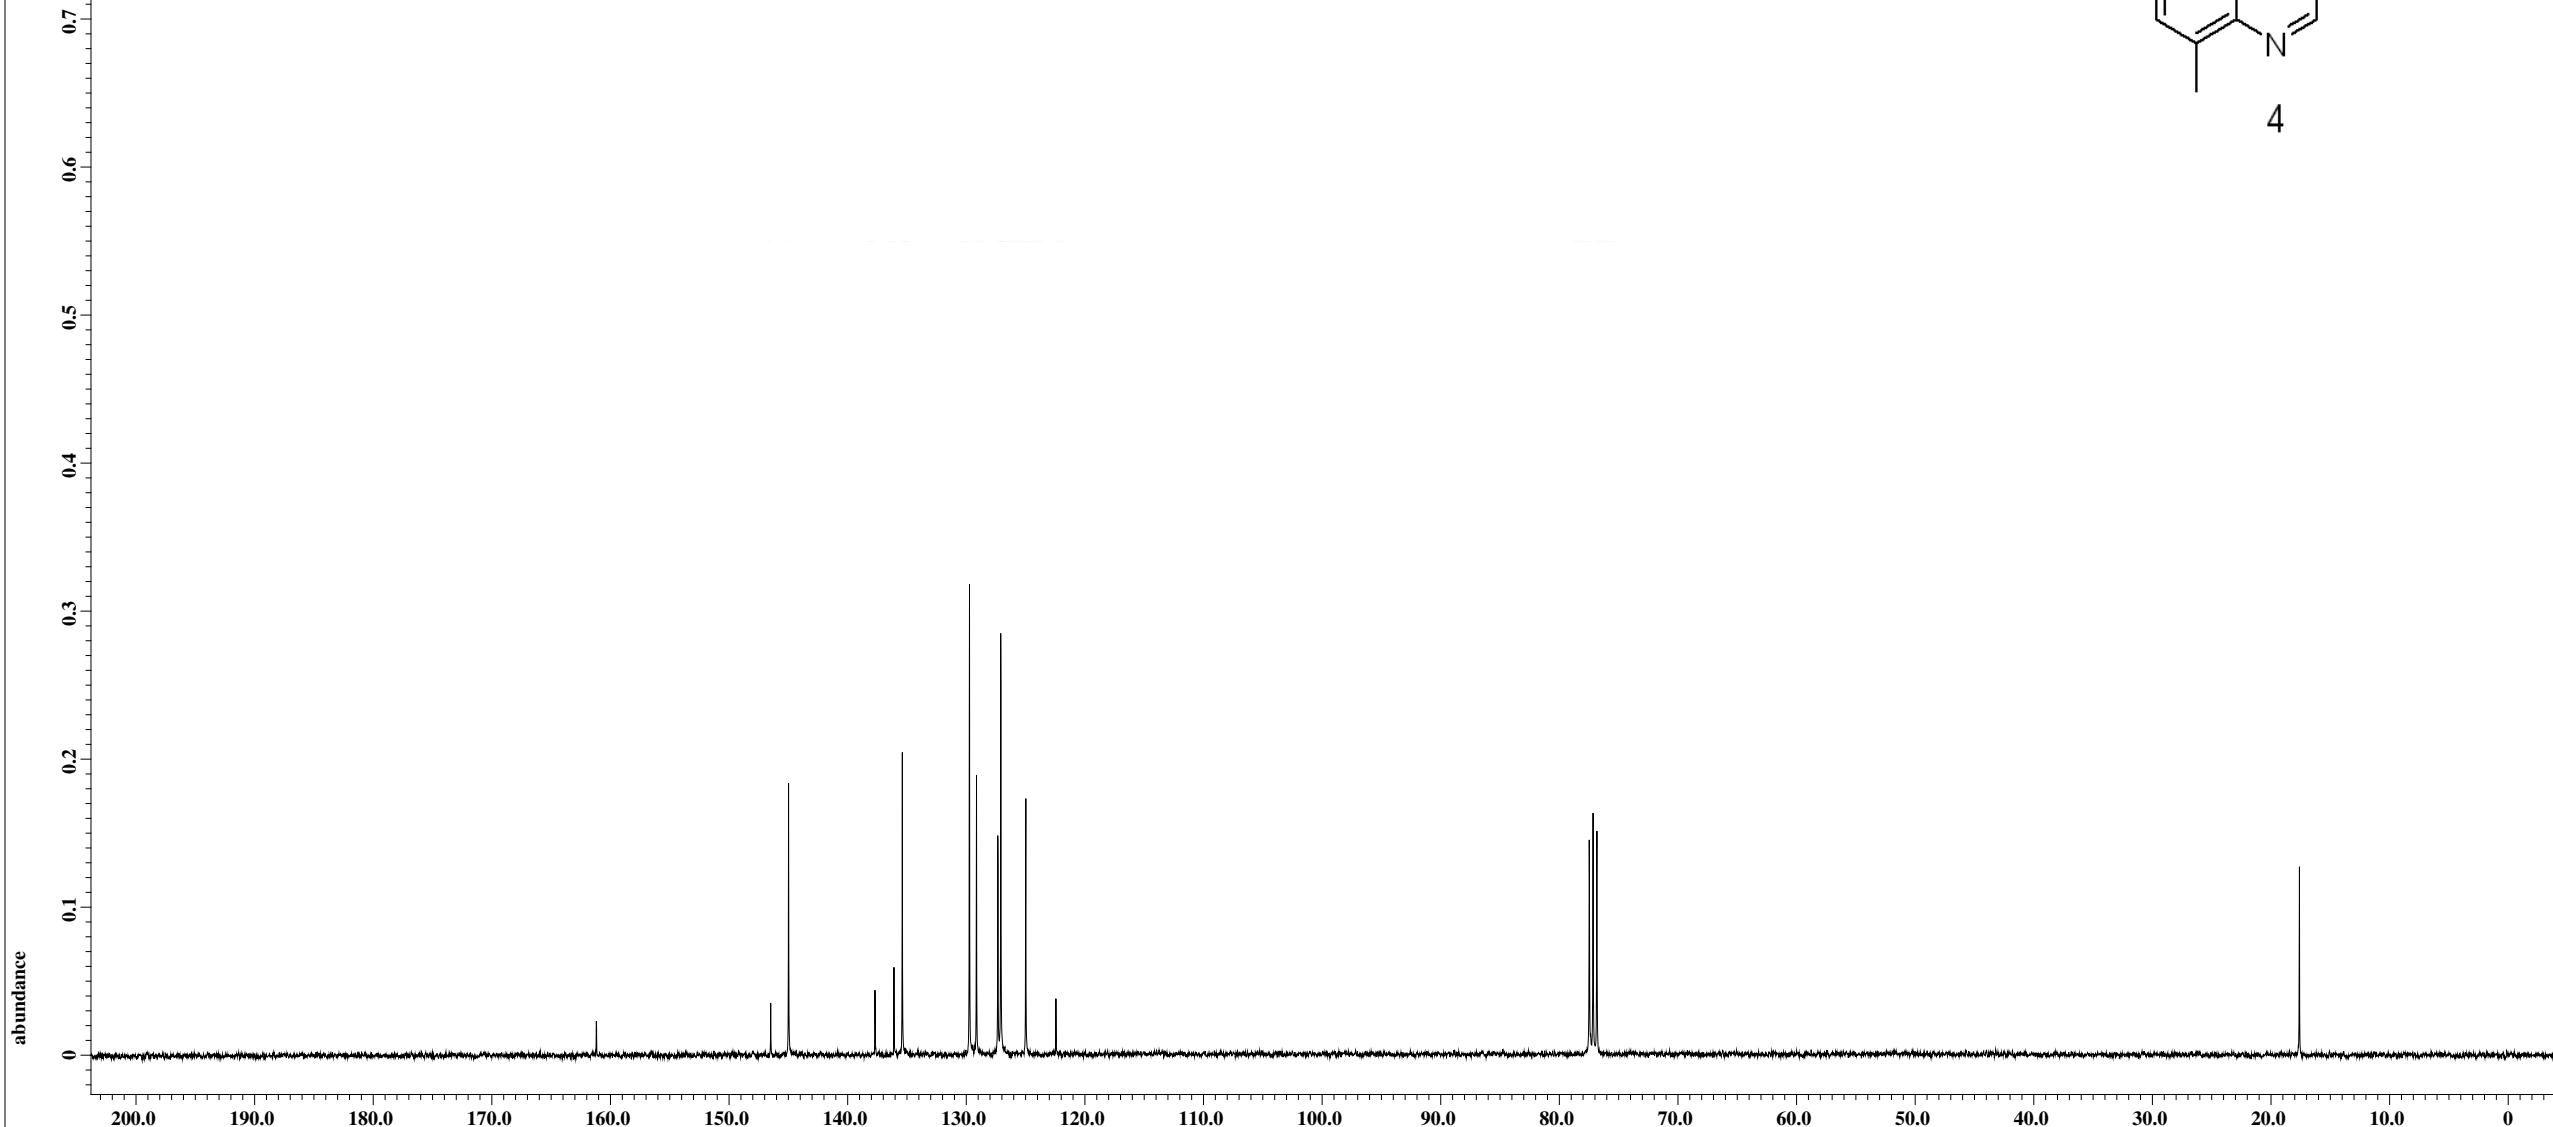

161.1929  
146.4906  
144.9841  
137.6997  
136.0979  
135.3924  
129.7288  
129.1377  
127.3452  
127.0973  
124.9806  
122.4444  
77.4793  
77.1551  
76.8310  
17.6021

X : parts per Million : 13C

Sample\_id = YWJ1103  
Filename = NMR-2017-03295C-4.jdf  
Creation\_time = 5-JUN-2017 16:06:01  
Site = ECA400  
Experiment = single\_pulse\_dec  
X\_domain = 13C  
Scans = 616  
Temp\_get = 20.4[dC]  
Solvent = CHLOROFORM-D

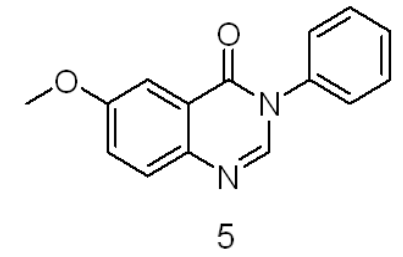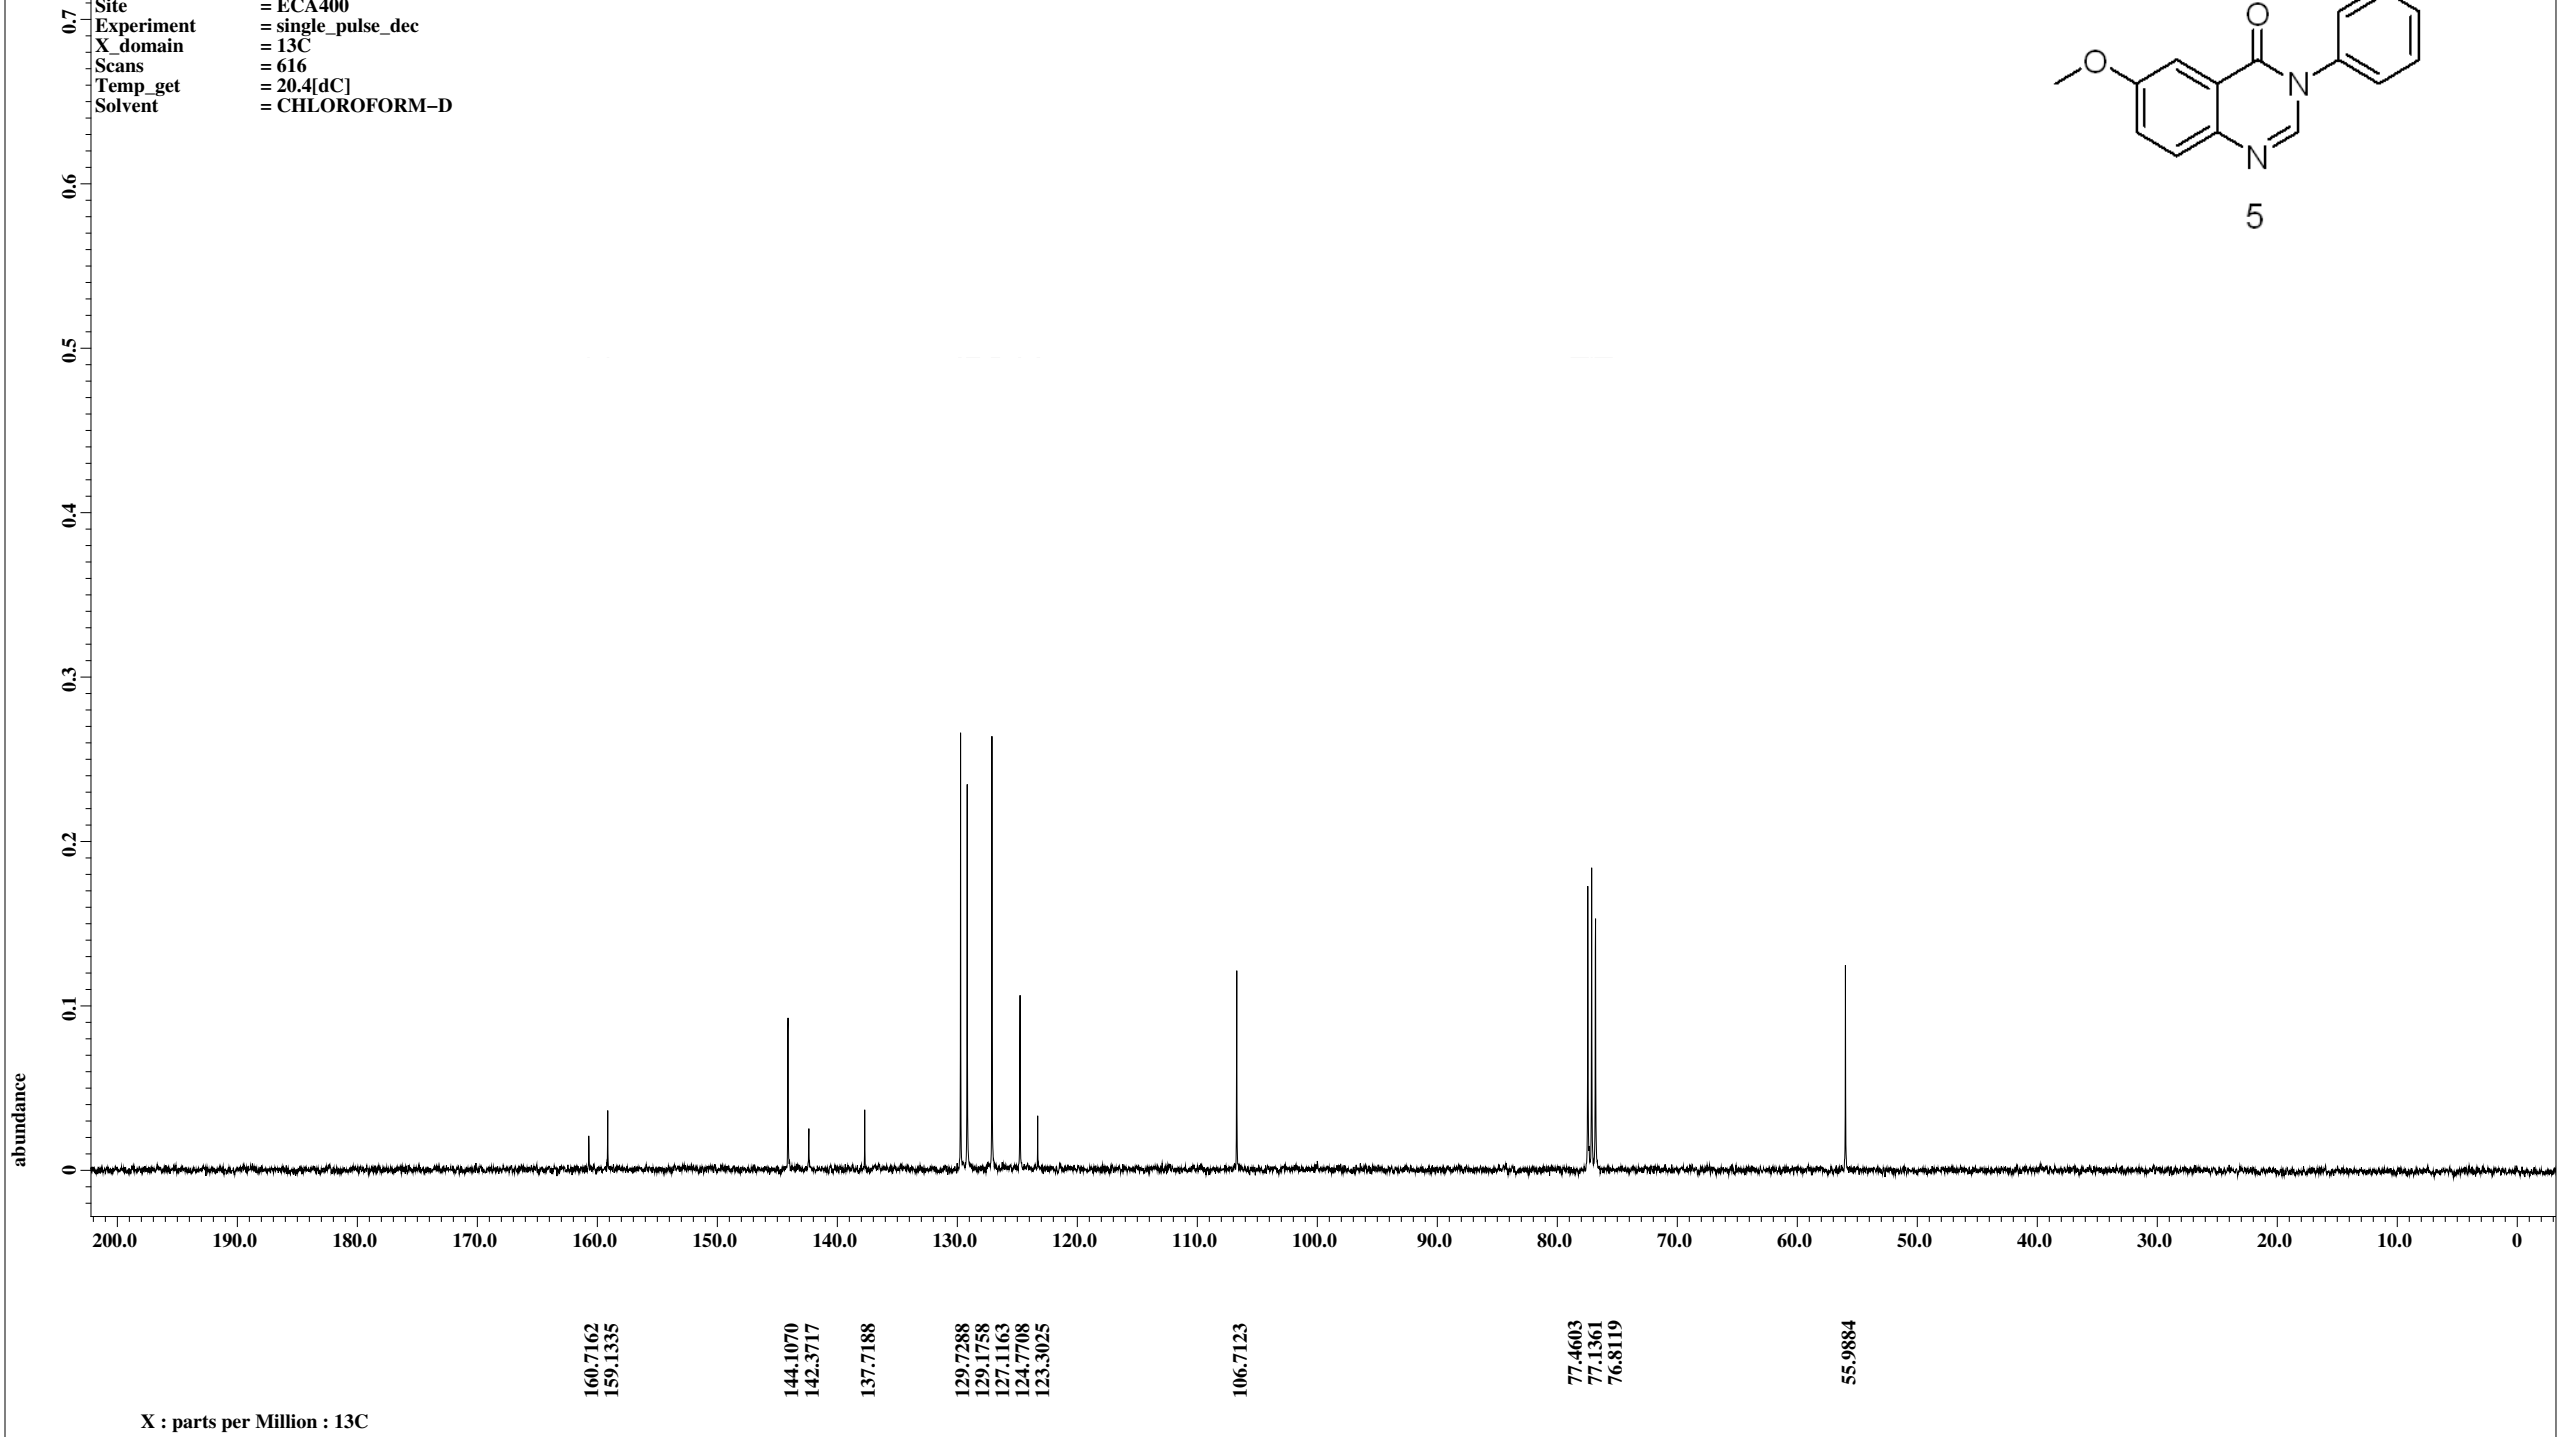

Sample\_id = YWJ1106  
Filename = NMR-2017-03298C-5.jdf  
Creation\_time = 6-JUN-2017 08:22:16  
Site = ECA400  
Experiment = single\_pulse\_dec  
X\_domain = 13C  
Scans = 566  
Temp\_get = 19.3[dC]  
Solvent = CHLOROFORM-D

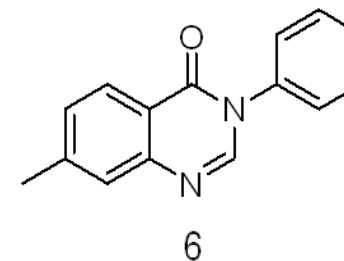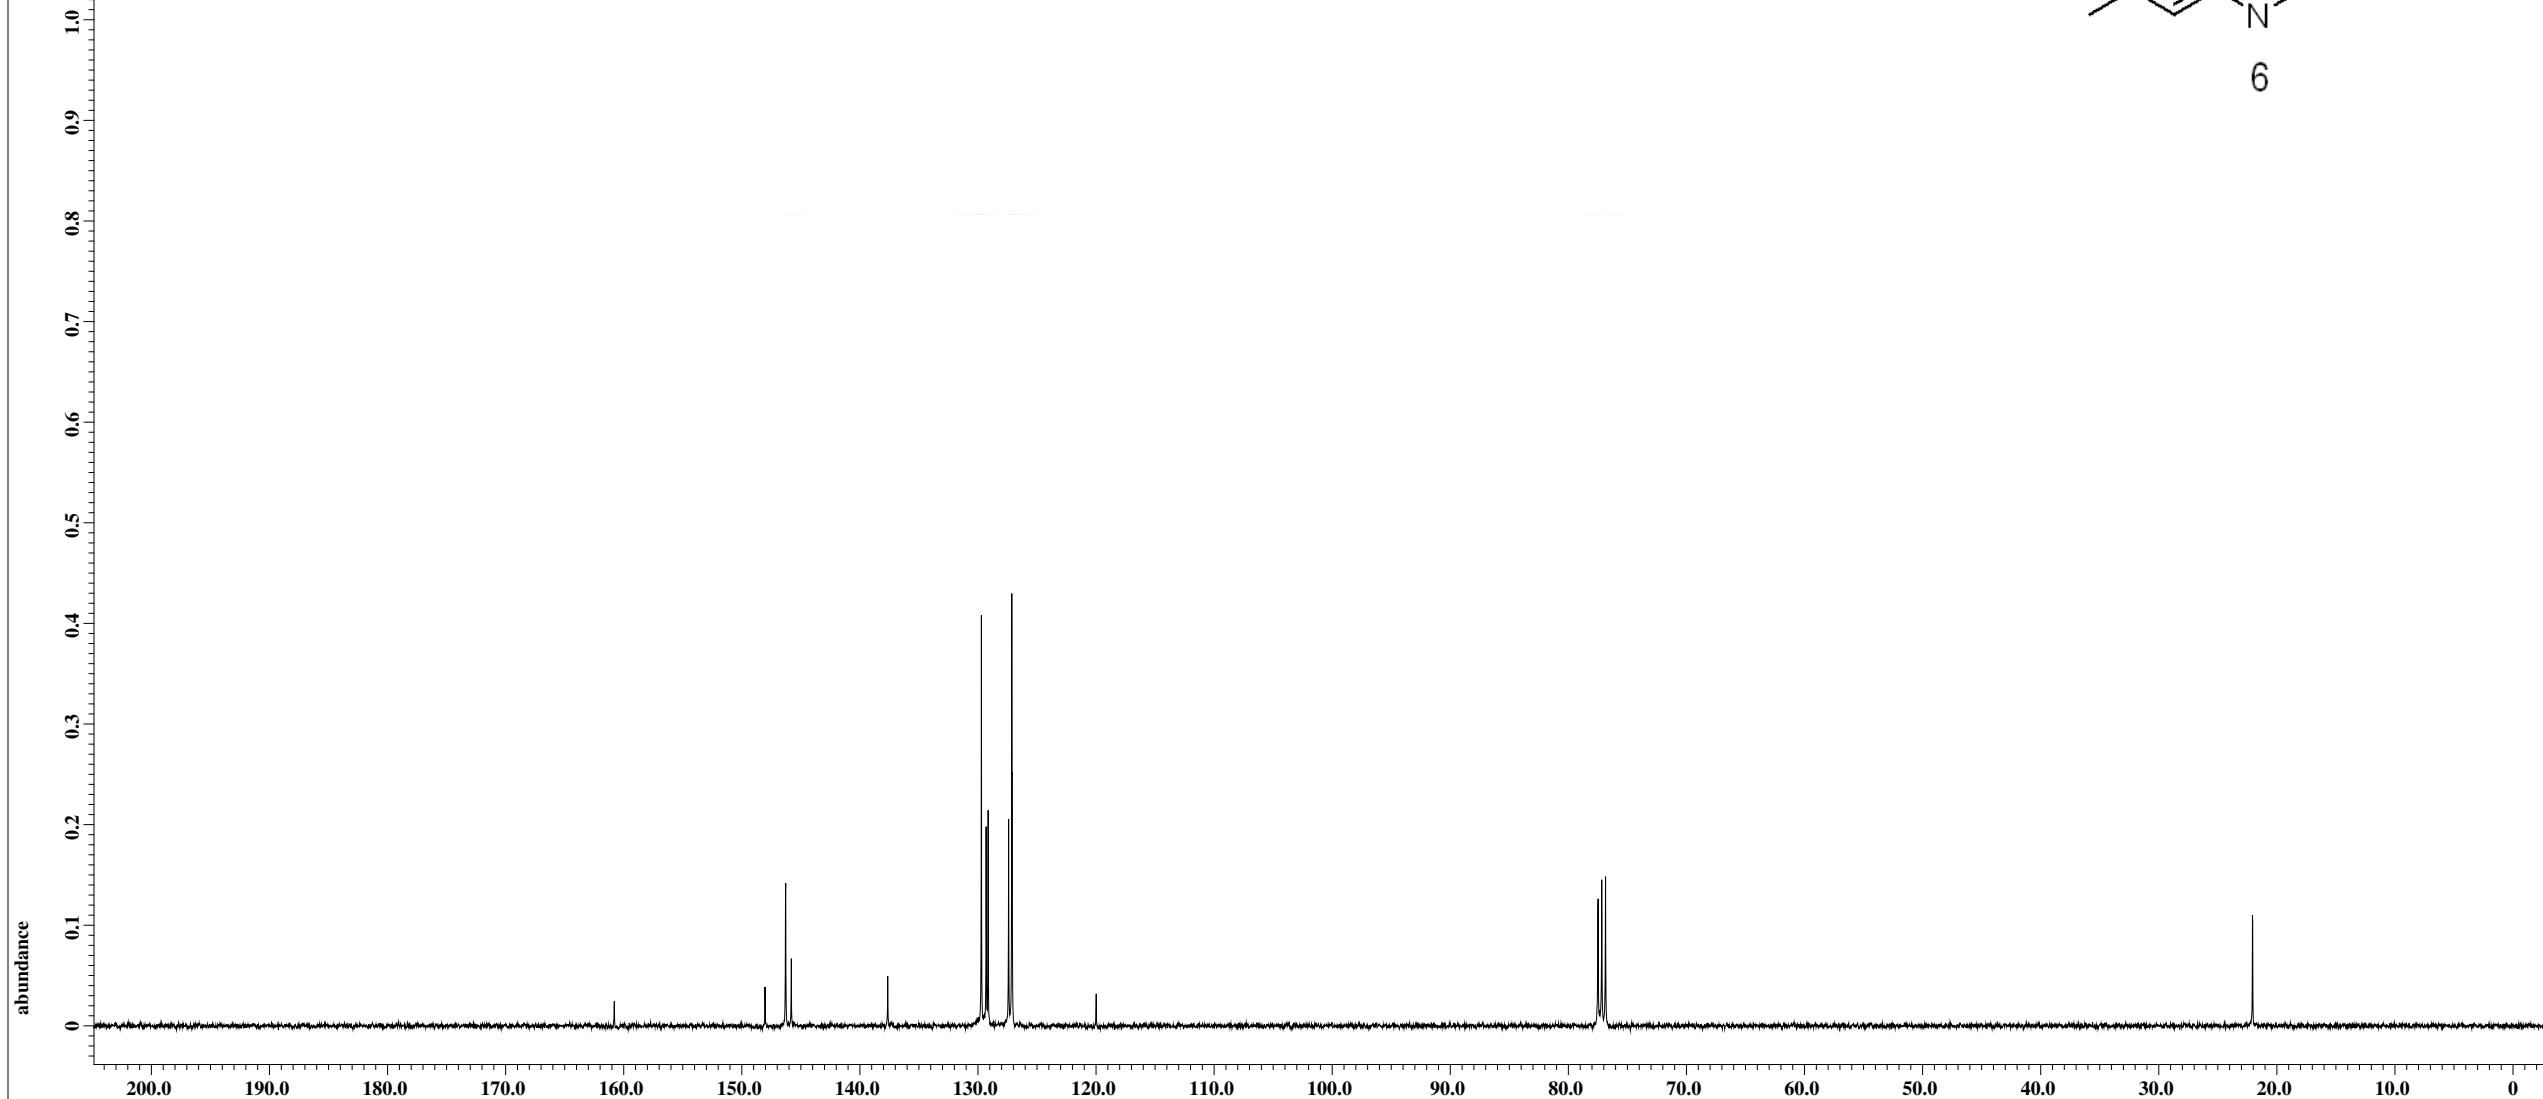

160.7925

148.0352  
146.2809  
145.8041

137.6425

129.7097  
129.3093  
129.1377  
127.4024  
127.1354

119.9845

77.4793  
77.1742  
76.8500

22.0643

X : parts per Million : 13C

Sample\_id = YWJ1110  
Filename = NMR-2017-03540-6.jdf  
Creation\_time = 19-JUN-2017 08:41:59  
Site = ECA400  
Experiment = single\_pulse\_dec  
X\_domain = 13C  
Scans = 505  
Temp\_get = 20.1[dC]  
Solvent = CHLOROFORM-D

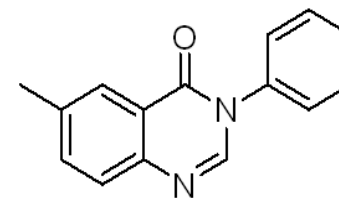

7

abundance

0.5  
0.4  
0.3  
0.2  
0.1  
0

200.0 190.0 180.0 170.0 160.0 150.0 140.0 130.0 120.0 110.0 100.0 90.0 80.0 70.0 60.0 50.0 40.0 30.0 20.0 10.0 0

160.6945

145.6871  
145.3057

137.9260  
137.5255  
135.9618

129.5737  
129.0016  
127.2663  
126.9612  
126.5417  
121.9841

77.3242  
77.0000  
76.6949

21.3371

X : parts per Million : 13C

Sample\_id = YWJ1127  
Filename = NMR-2017-03694C-4.jdf  
Creation\_time = 26-JUN-2017 17:34:01  
Site = ECA400  
Experiment = single\_pulse\_dec  
X\_domain = 13C  
Scans = 856  
Temp\_get = 20[dC]  
Solvent = CHLOROFORM-D

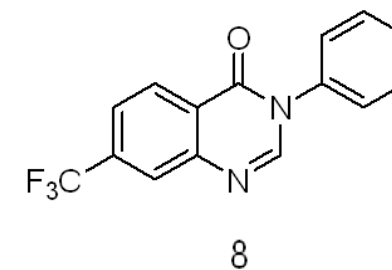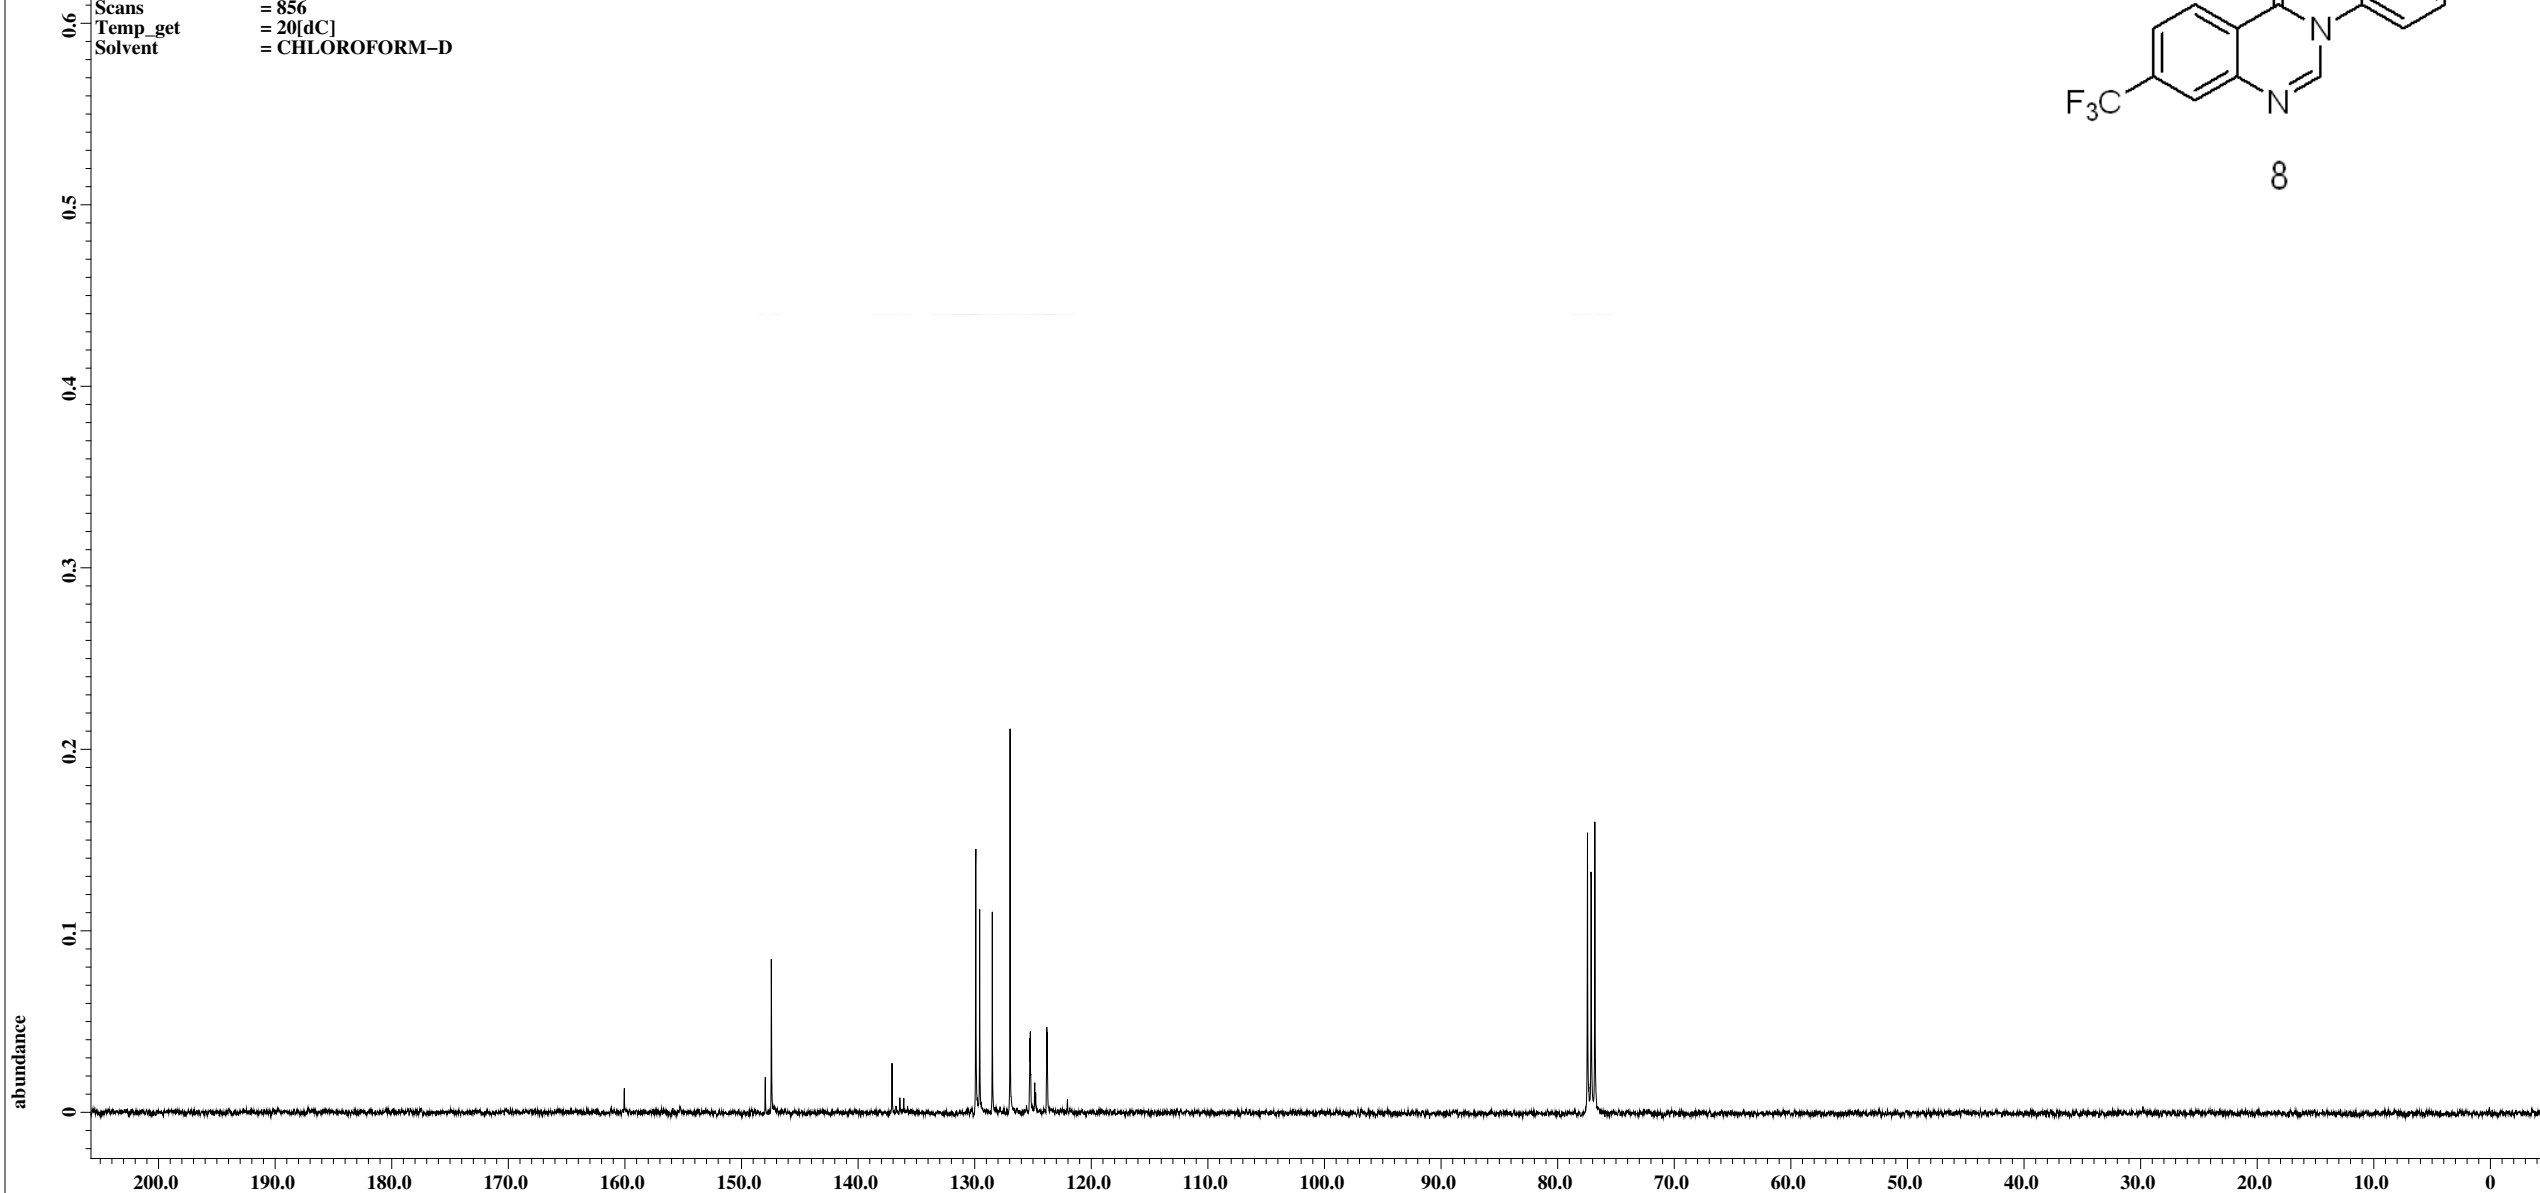

Sample\_id = YWJ1114  
Filename = NMR-2017-03541-4.jdf  
Creation\_time = 19-JUN-2017 08:58:37  
Site = ECA400  
Experiment = single\_pulse\_dec  
X\_domain = 13C  
Scans = 504  
Temp\_get = 20.1[dC]  
Solvent = CHLOROFORM-D

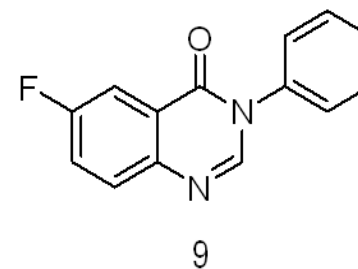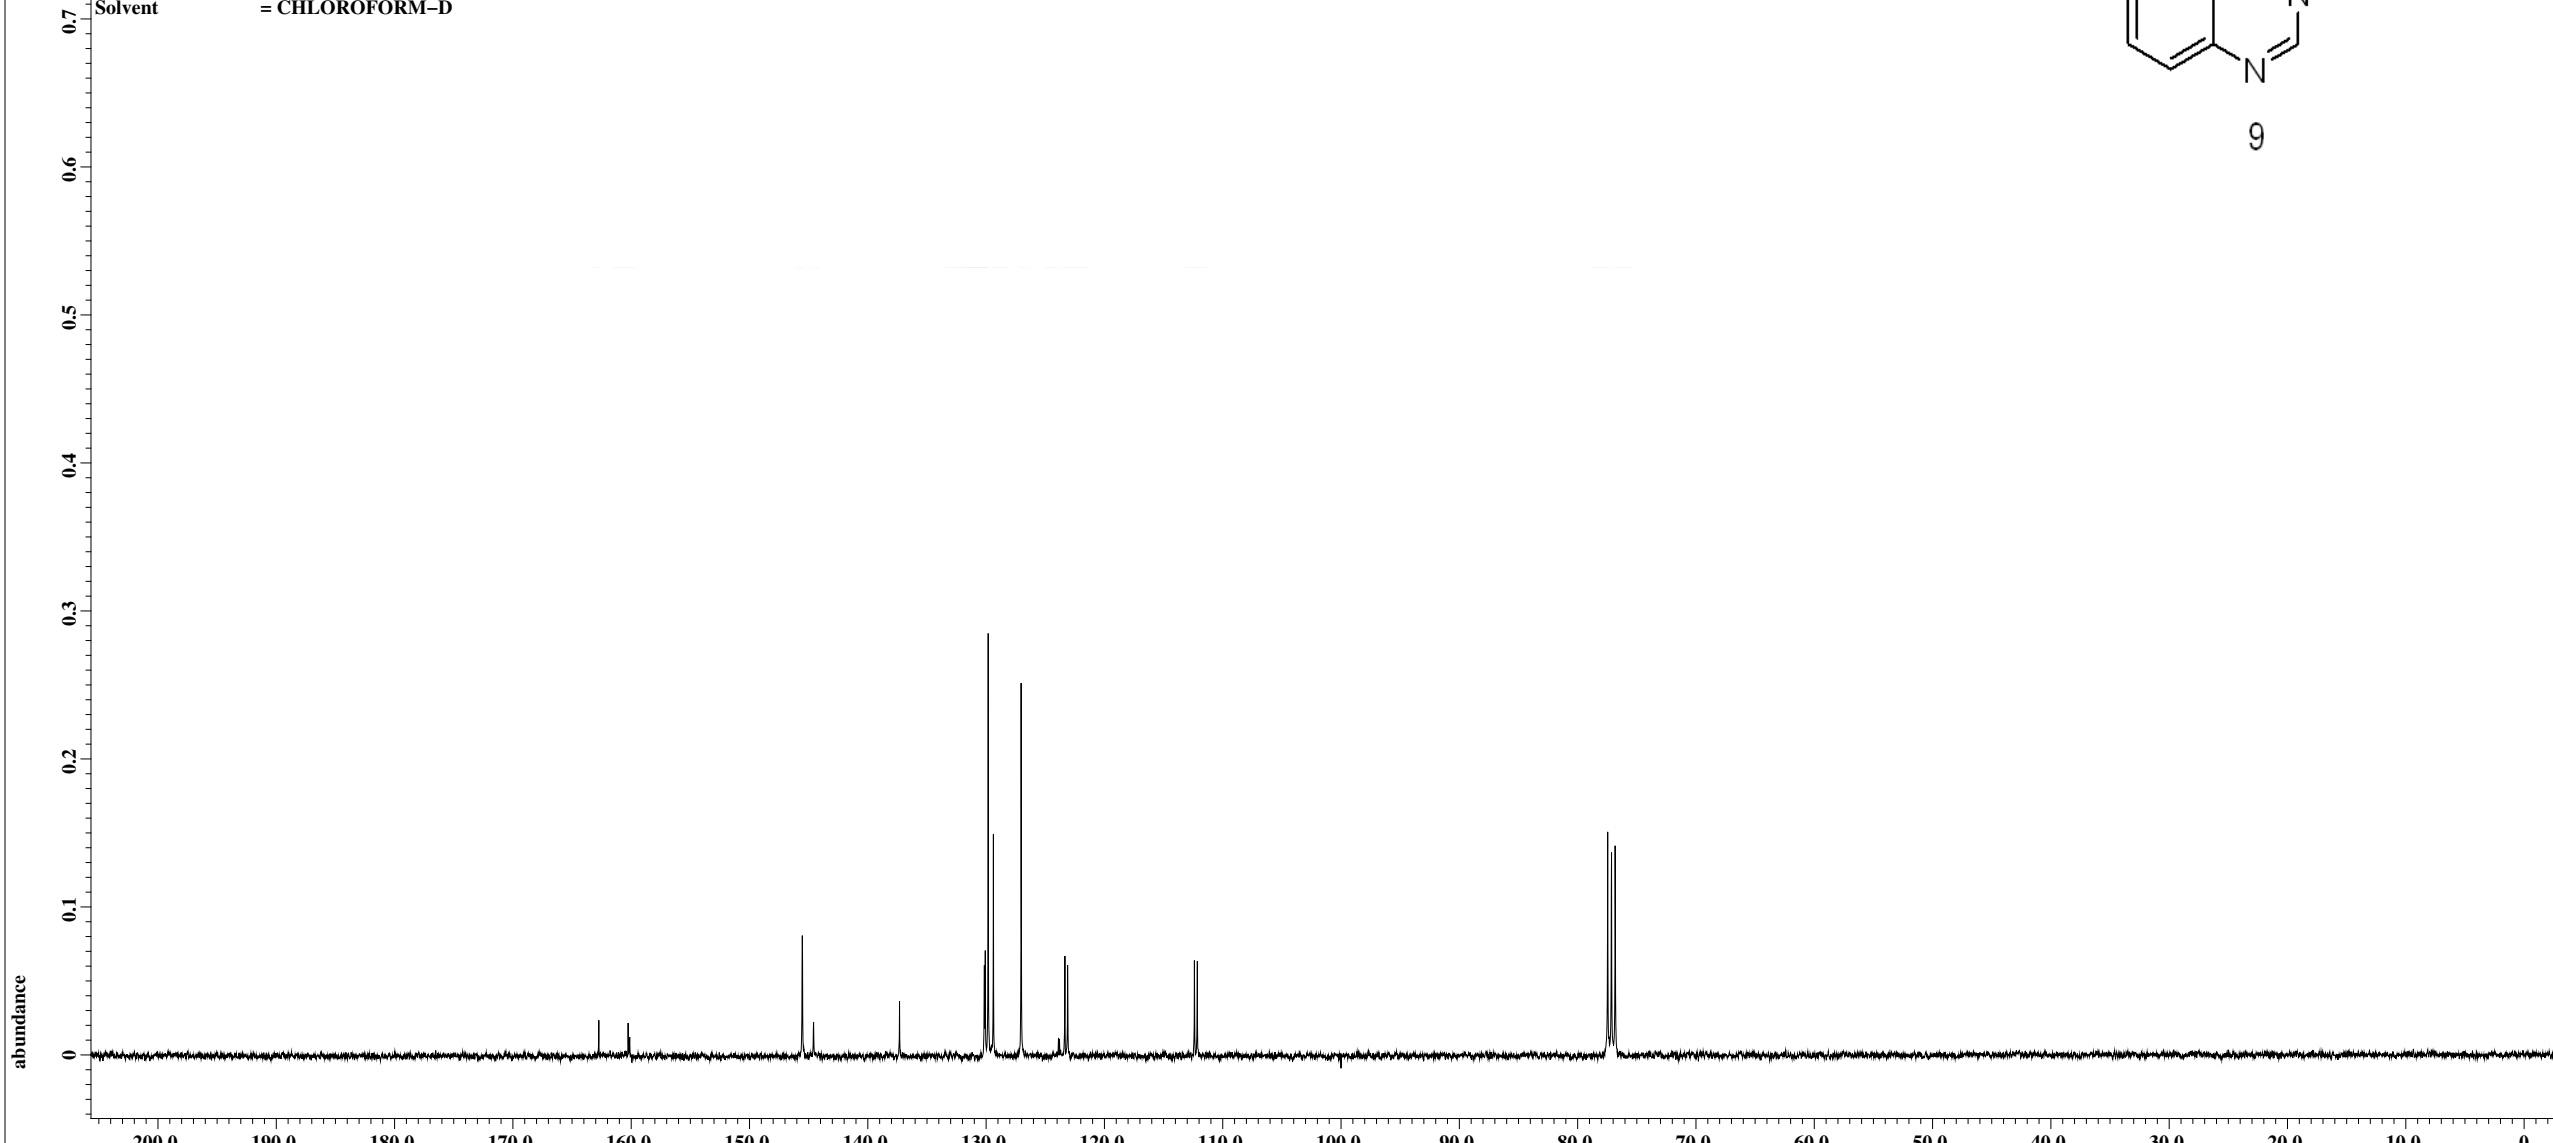

162.7375  
160.2585  
160.1251

145.5372  
144.5837

137.3183

130.1483  
130.0721  
129.8242  
129.3856  
127.0401  
123.8746  
123.3407  
123.1118

112.3950  
112.1471

77.4603  
77.1361  
76.8310

X : parts per Million : 13C

Sample\_id = YWJ1131  
Filename = NMR-2017-03734C-2.jdf  
Creation\_time = 28-JUN-2017 11:26:14  
Site = ECA400  
Experiment = single\_pulse\_dec  
X\_domain = 13C  
Scans = 518  
Temp\_get = 19.1[dC]  
Solvent = CHLOROFORM-D

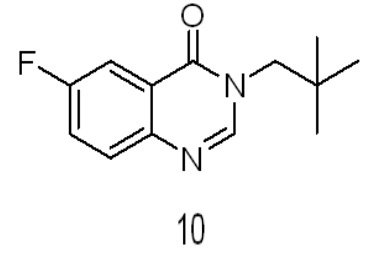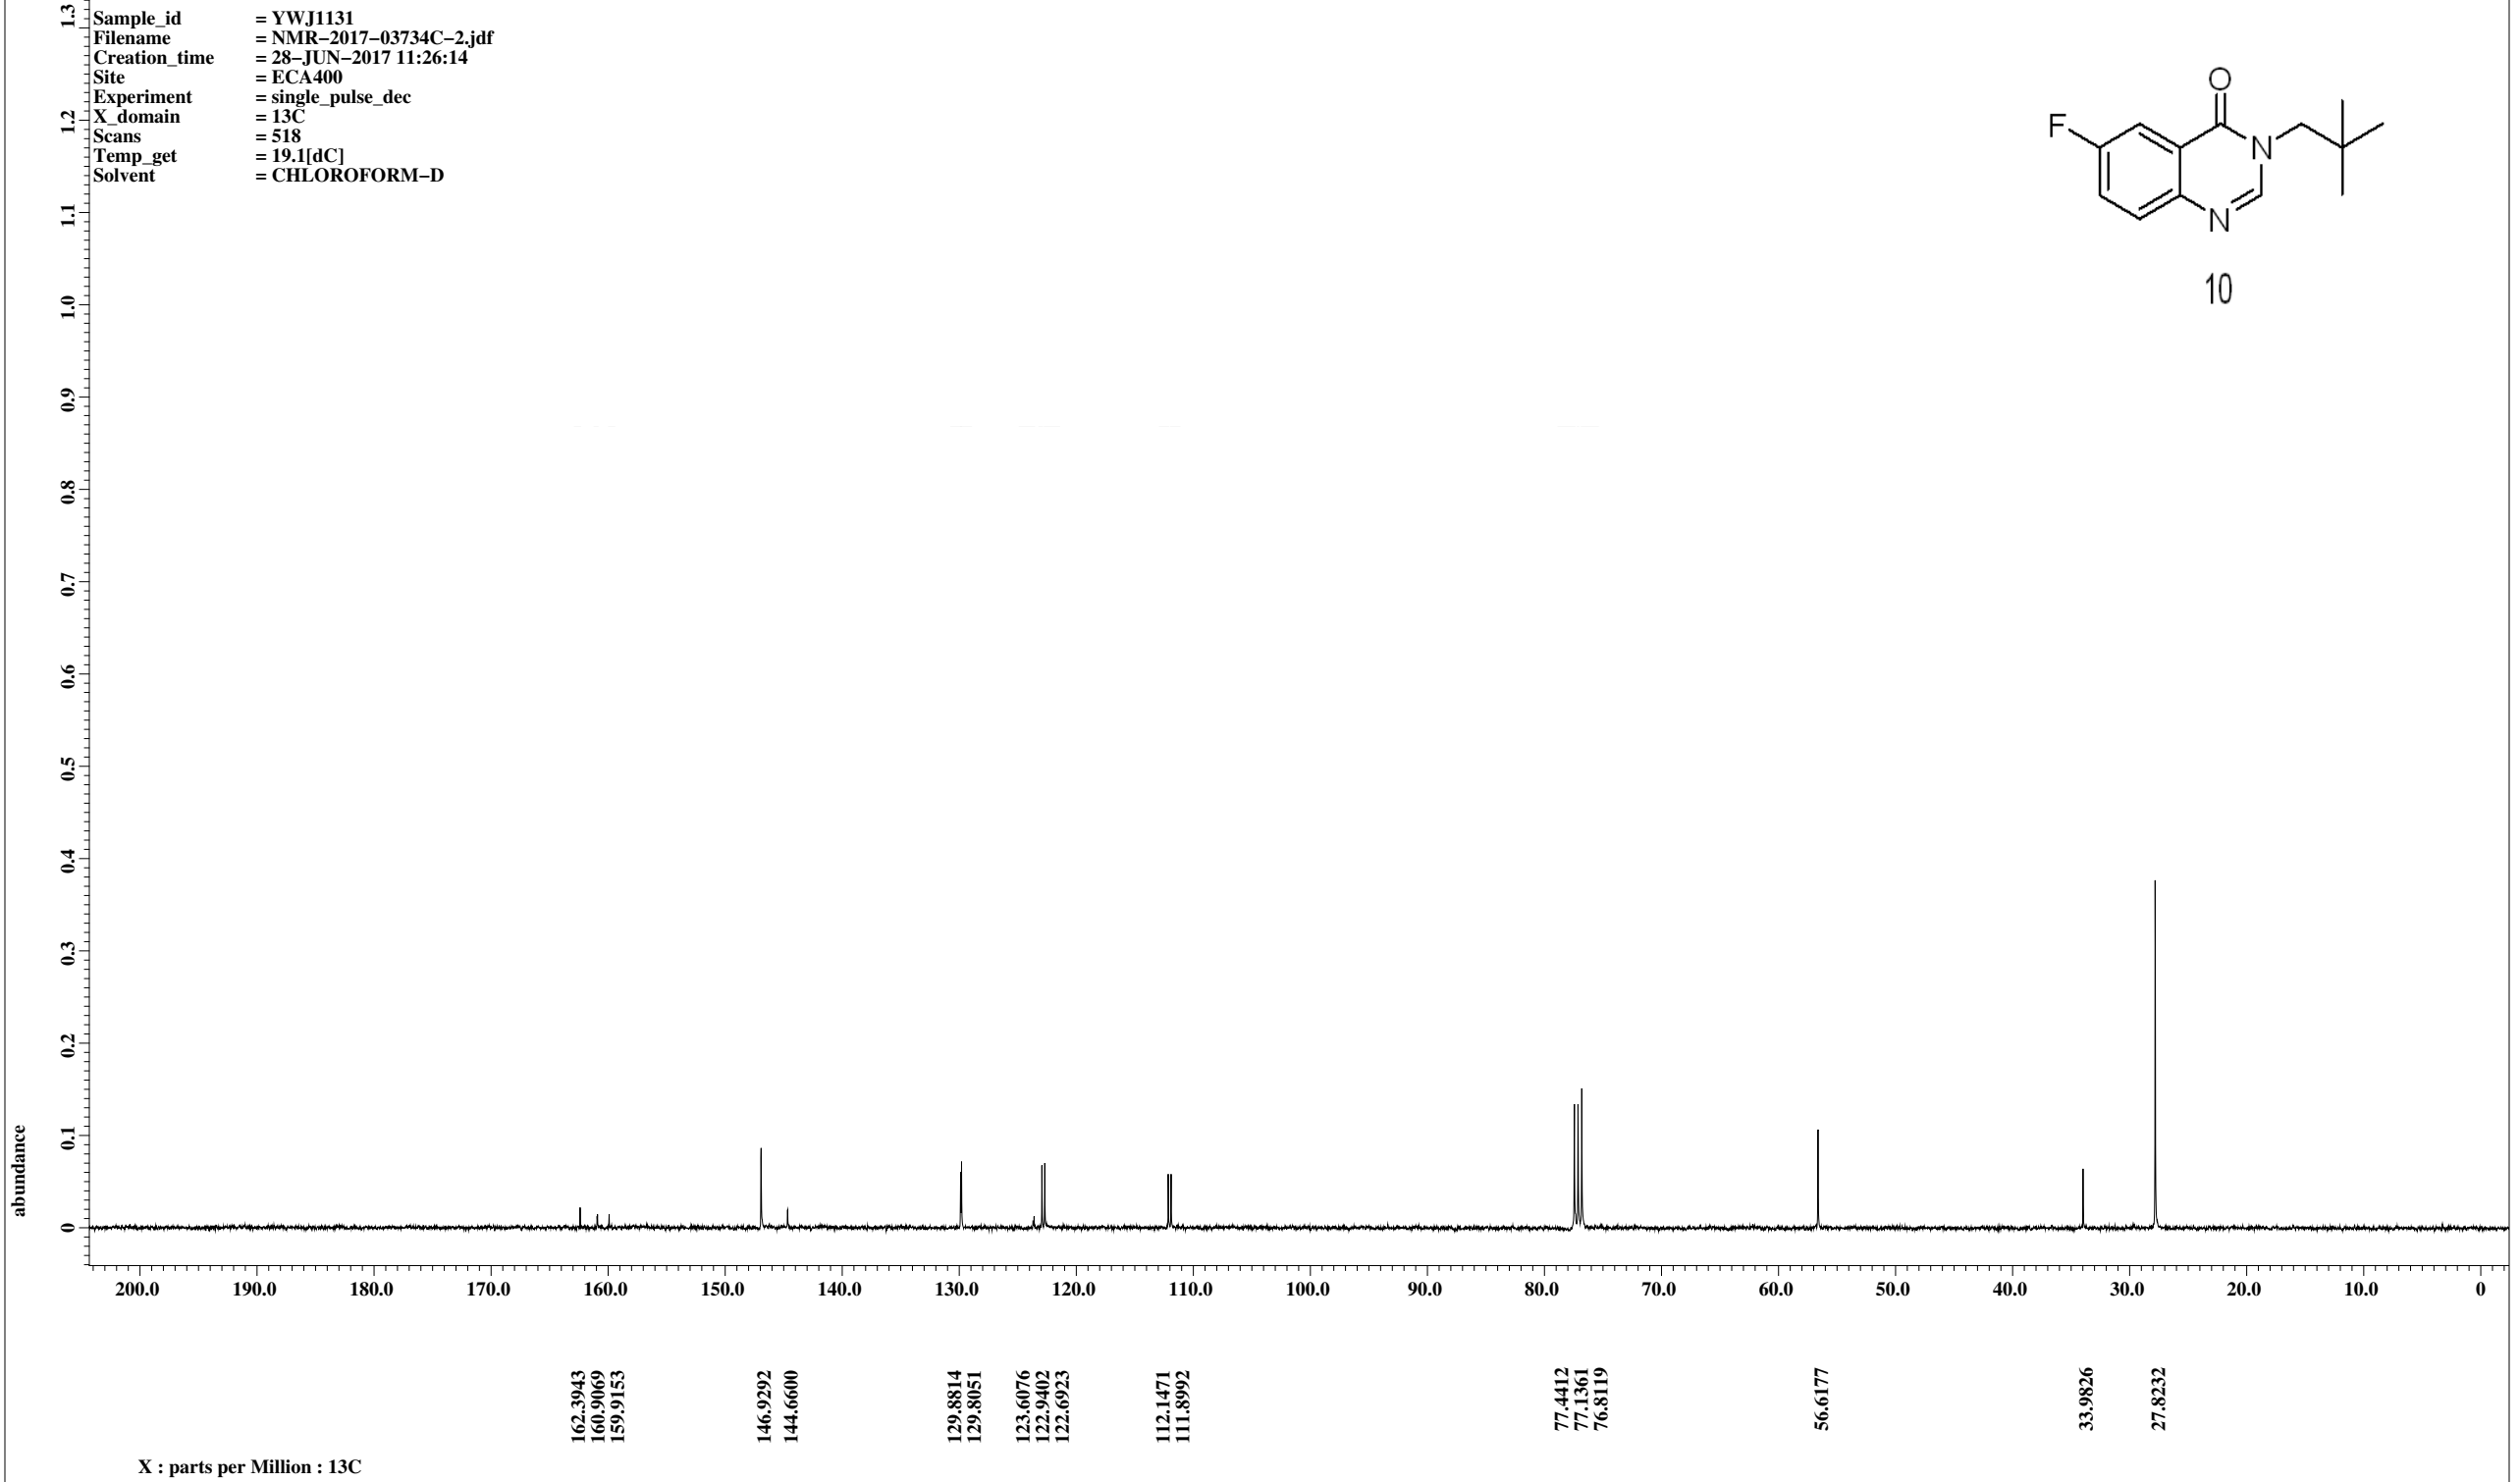



Sample\_id = YWJ1141  
Filename = NMR-2017-03884C-7.jdf  
Creation\_time = 7-JUL-2017 16:26:51  
Site = ECA400  
Experiment = single\_pulse\_dec  
X\_domain = 13C  
Scans = 1727  
Temp\_get = 19.2[dC]  
Solvent = CHLOROFORM-D

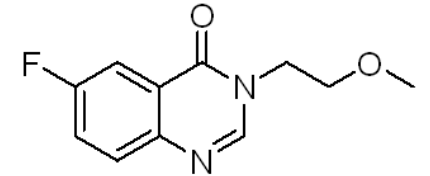

11

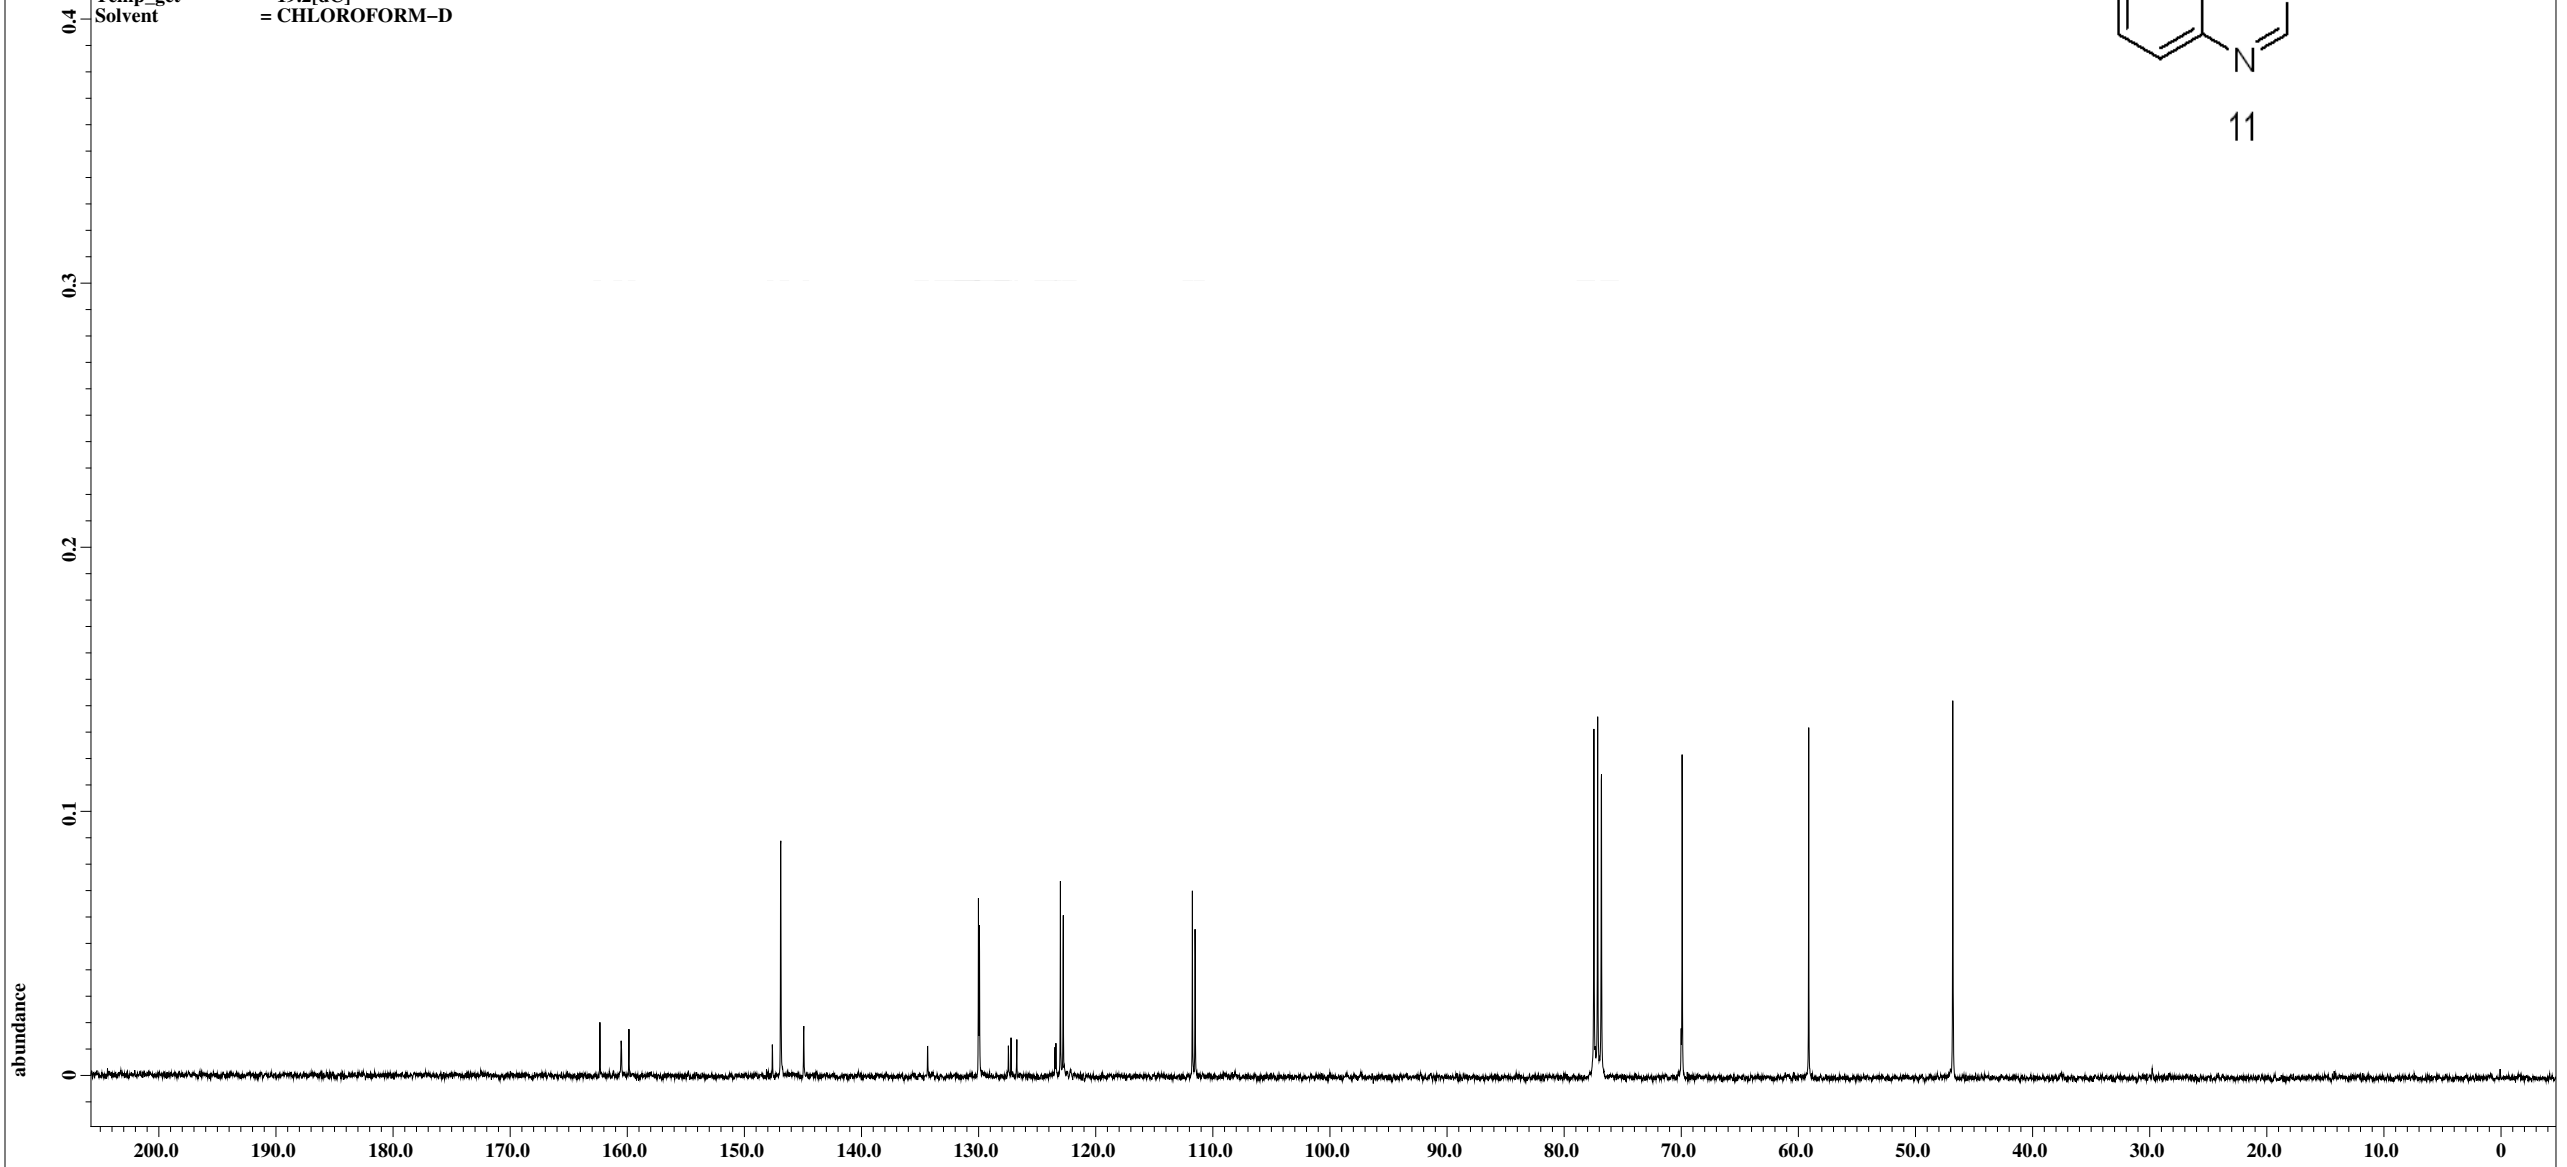

162.3371  
160.5255  
159.8581

147.6157  
146.8911  
144.9269

134.3436  
130.0149  
129.9386  
127.4596  
127.2308  
126.7350  
123.3979  
123.0165  
122.7686

111.7466  
111.5178

77.4603  
77.1361  
76.8119

69.9279

59.1157

46.8161

X : parts per Million : 13C

Sample\_id = YWJ1136  
Filename = NMR-2017-03881C-13.jdf  
Creation\_time = 7-JUL-2017 11:04:45  
Site = ECA400  
Experiment = single\_pulse\_dec  
X\_domain = 13C  
Scans = 646  
Temp\_get = 18.8[dC]  
Solvent = CHLOROFORM-D

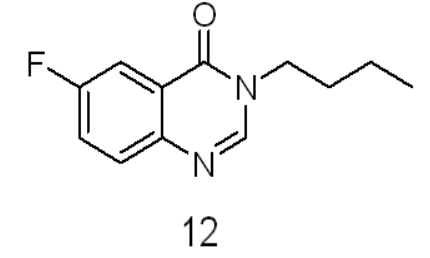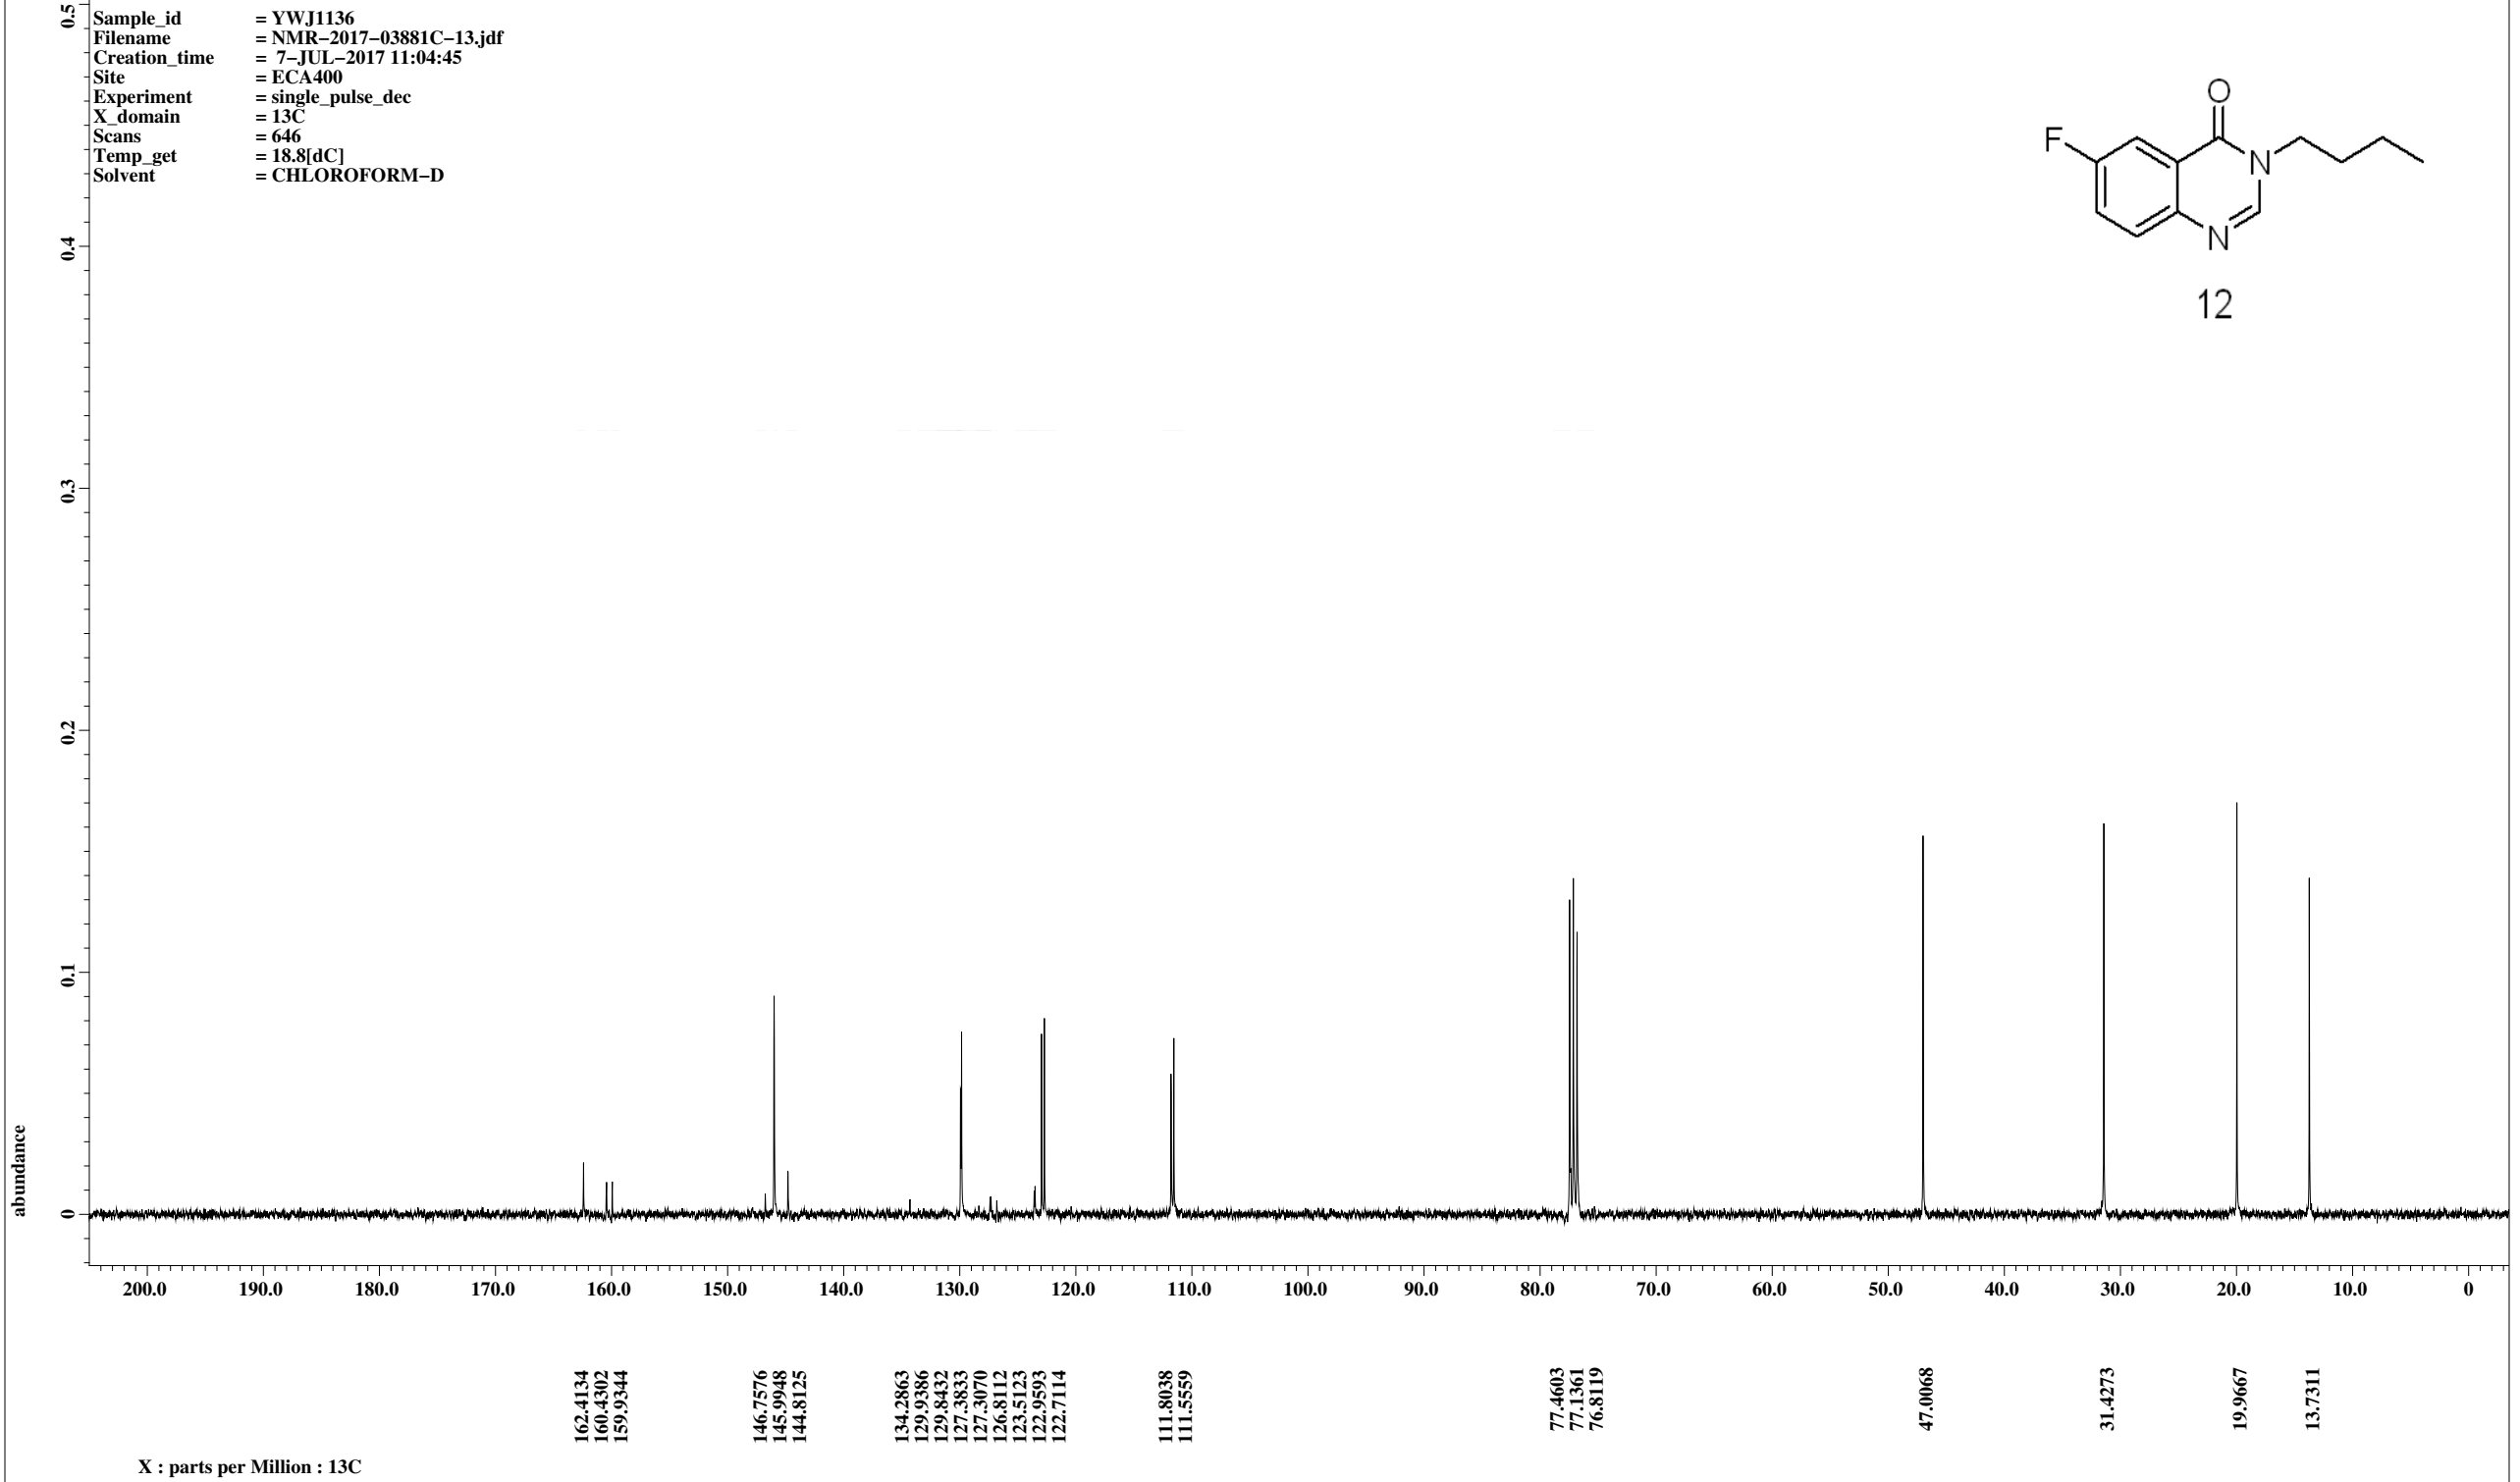

Sample\_id = YWJ1139  
Filename = NMR-2017-03882C-4.jdf  
Creation\_time = 7-JUL-2017 11:23:27  
Site = ECA400  
Experiment = single\_pulse\_dec  
X\_domain = 13C  
Scans = 559  
Temp\_get = 18.9[dC]  
Solvent = CHLOROFORM-D

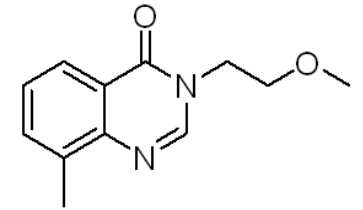

13

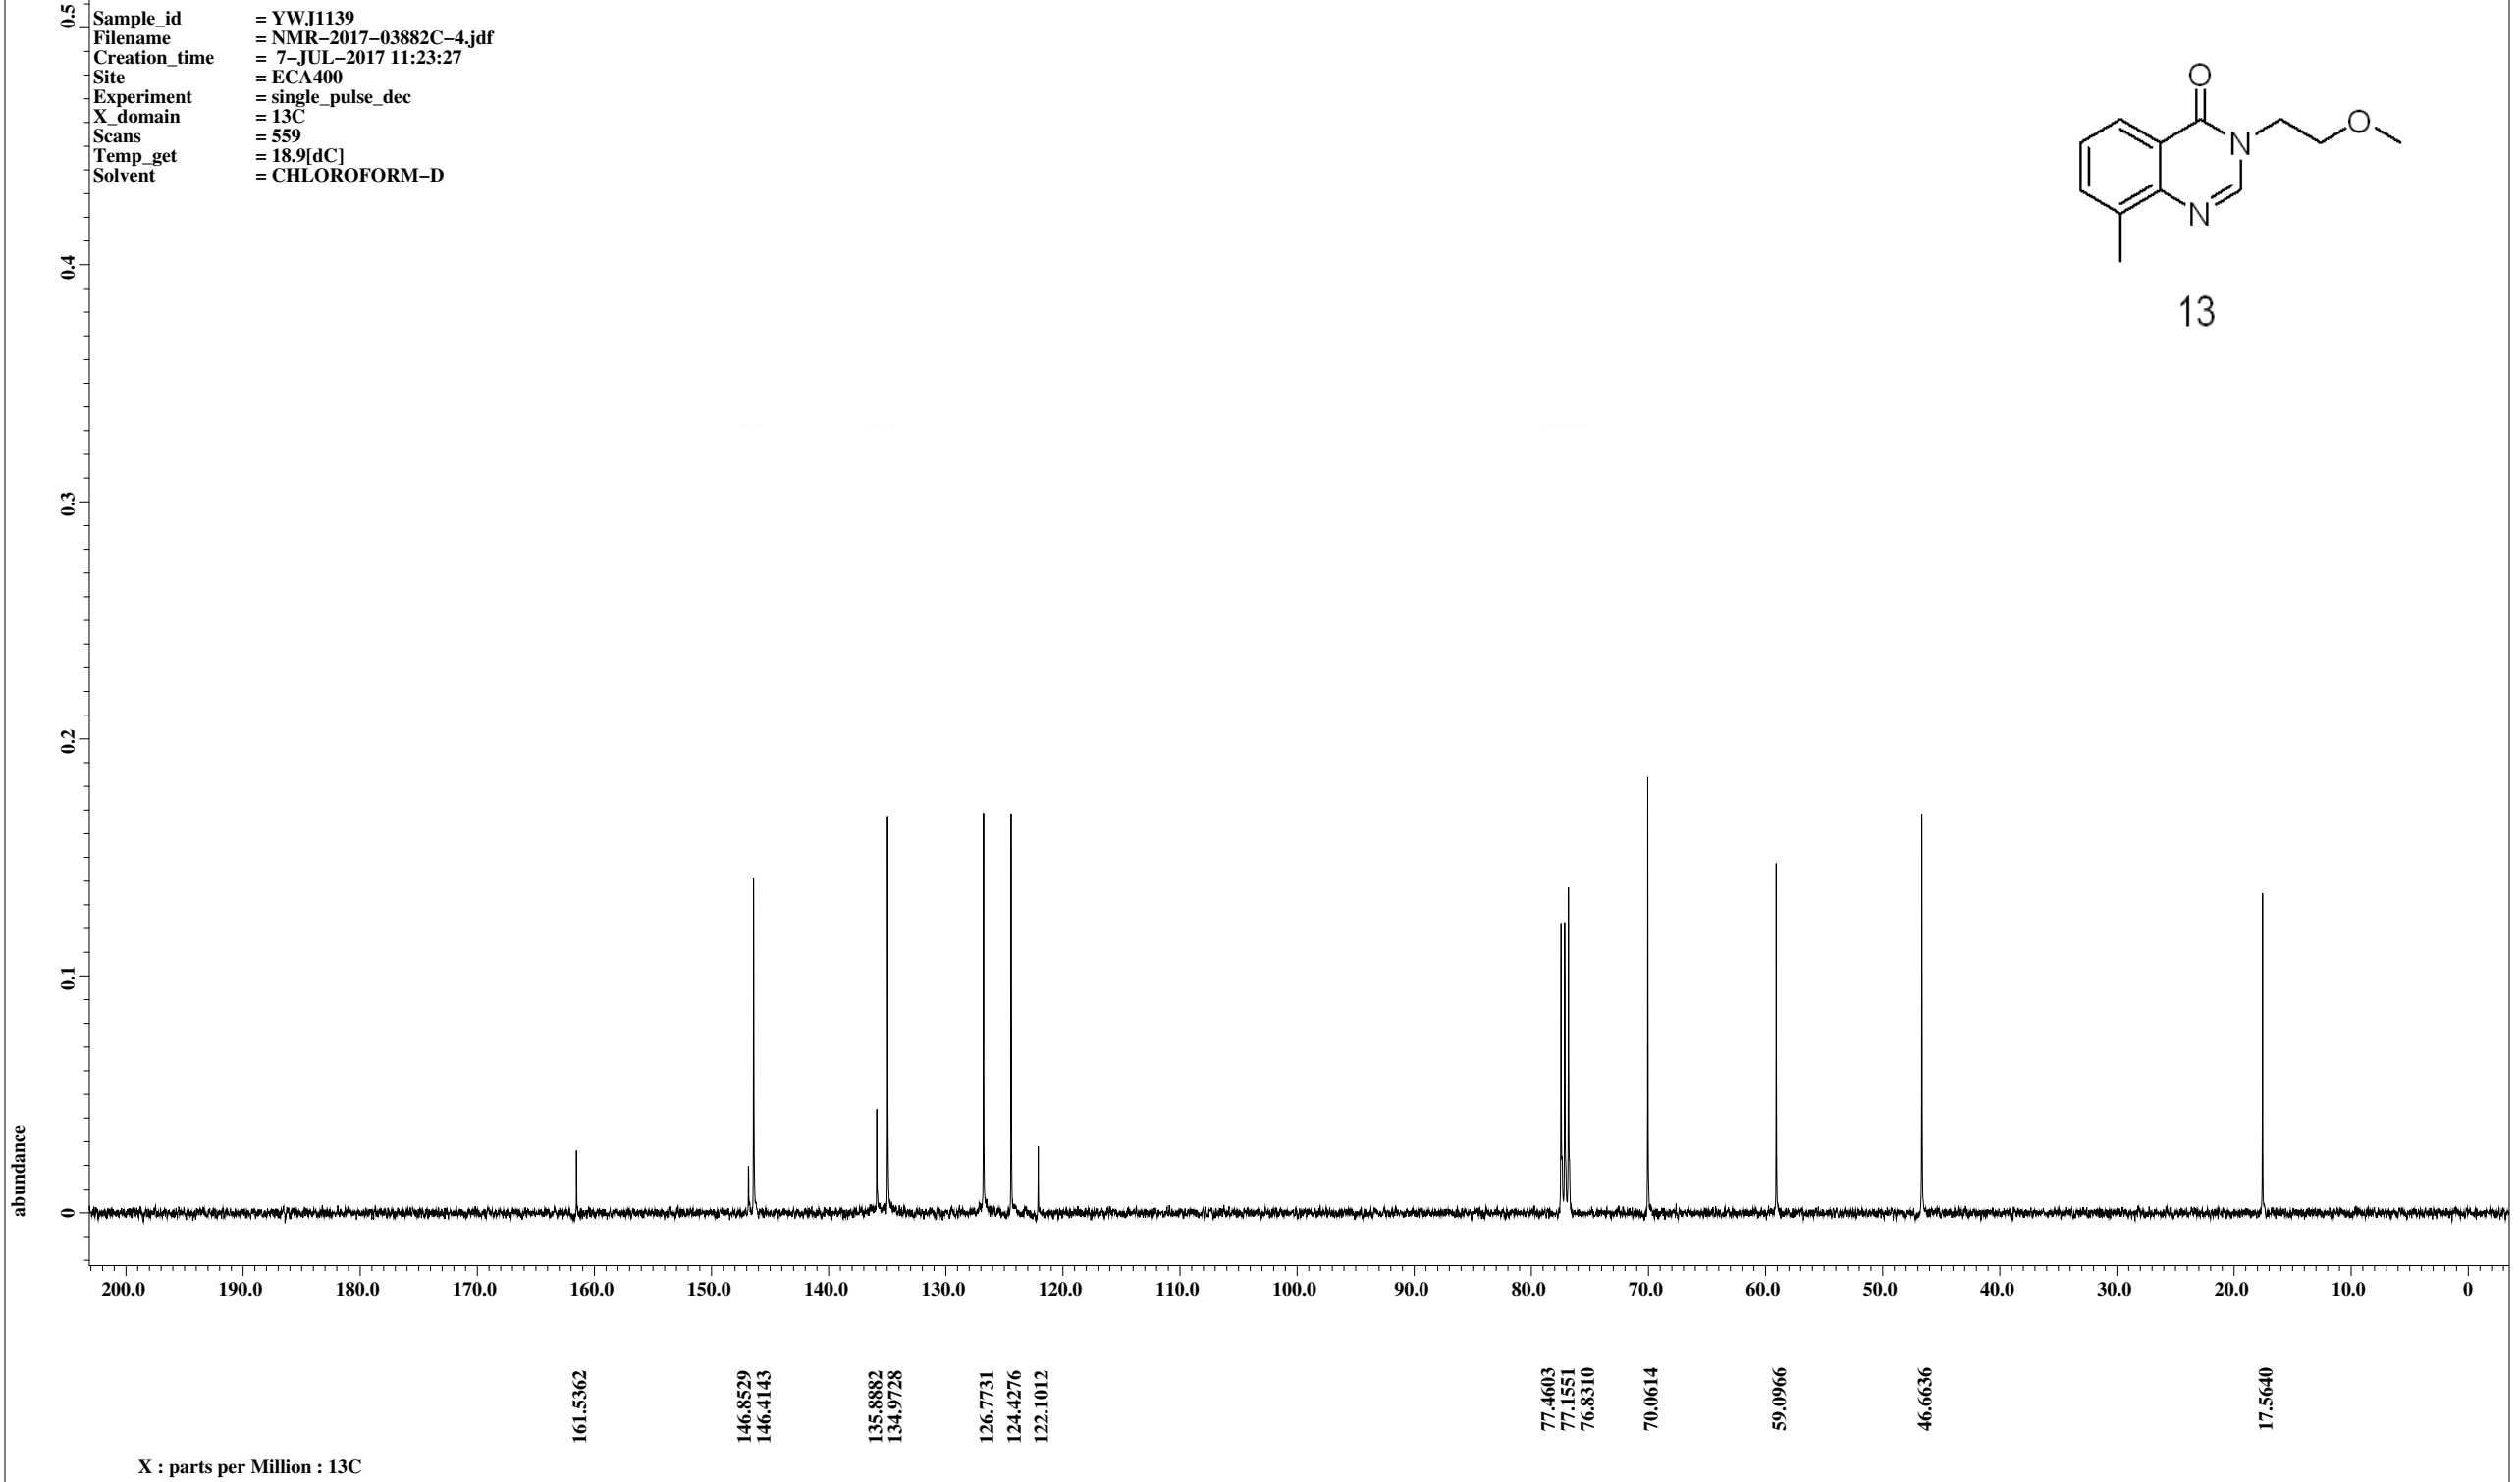

X : parts per Million : 13C

Sample\_id = YWJ1140  
Filename = NMR-2017-03883C-4.jdf  
Creation\_time = 7-JUL-2017 15:32:08  
Site = ECA400  
Experiment = single\_pulse\_dec  
X\_domain = 13C  
Scans = 790  
Temp\_get = 19.2[dC]  
Solvent = CHLOROFORM-D

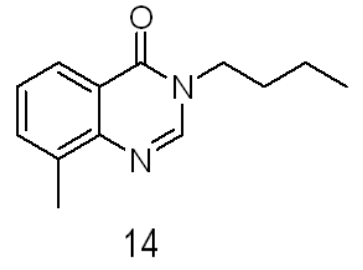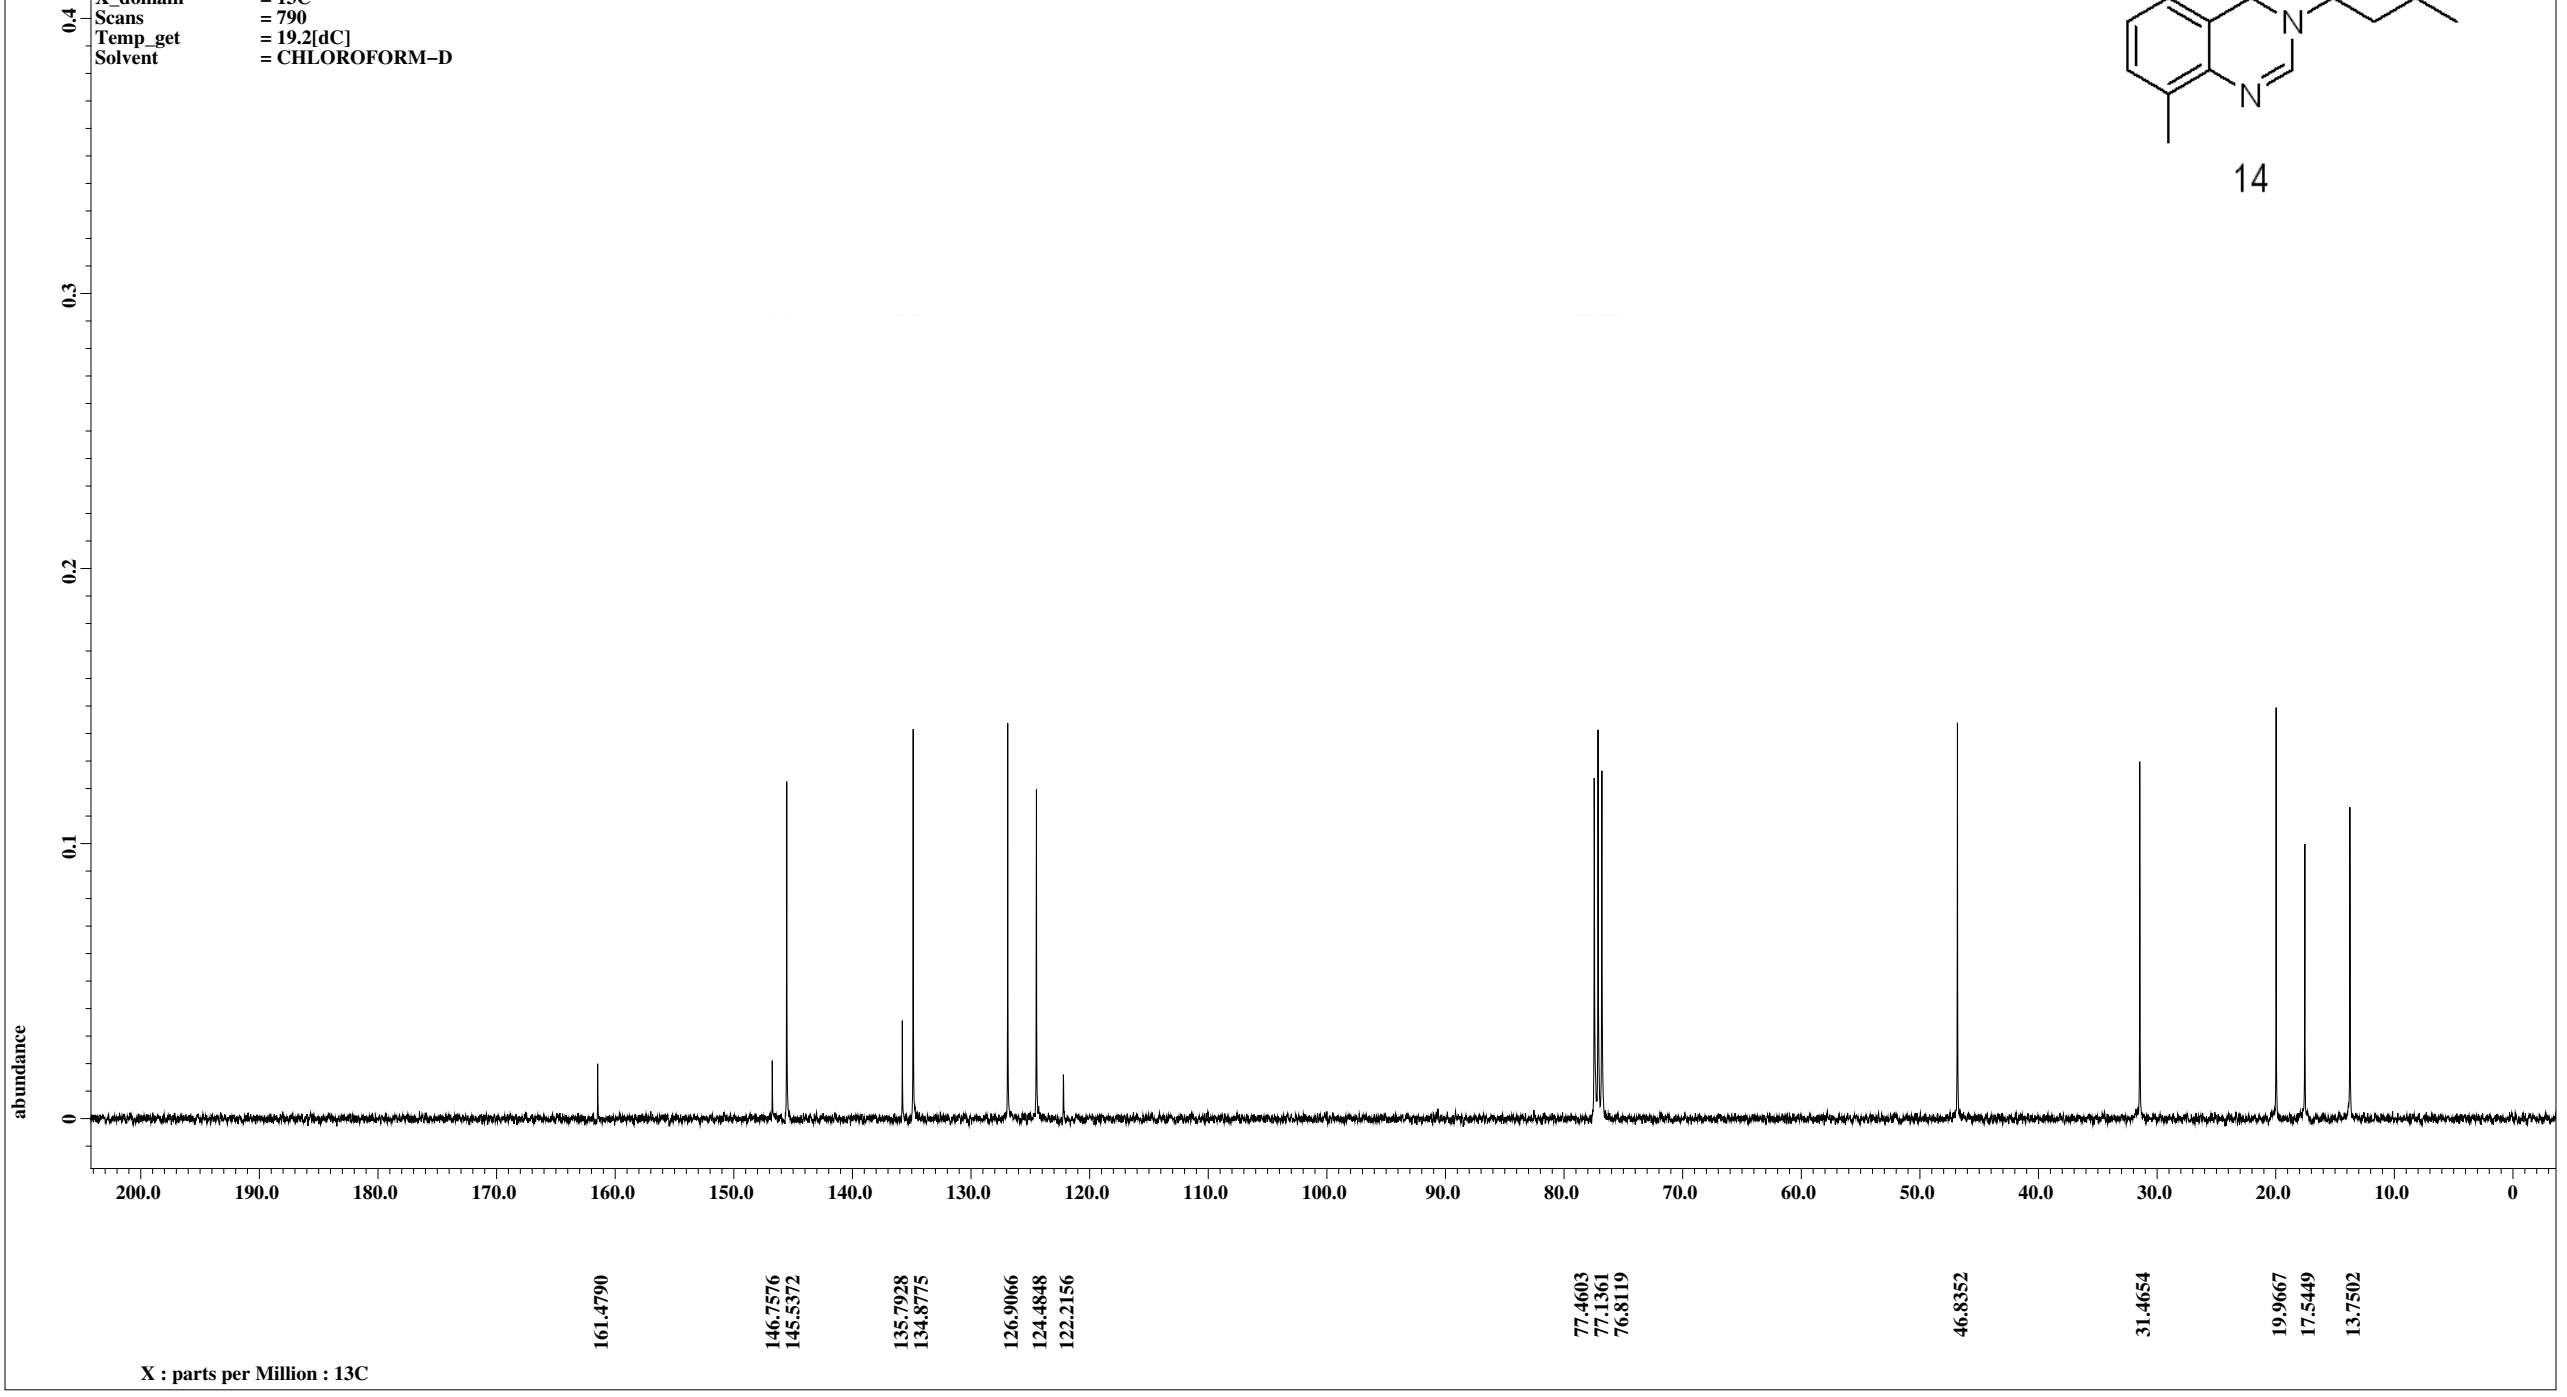

Sample\_id = YWJ1142  
Filename = NMR-2017-03885C-5.jdf  
Creation\_time = 7-JUL-2017 17:38:01  
Site = ECA400  
Experiment = single\_pulse\_dec  
X\_domain = 13C  
Scans = 239  
Temp\_get = 19.5[dC]  
Solvent = CHLOROFORM-D

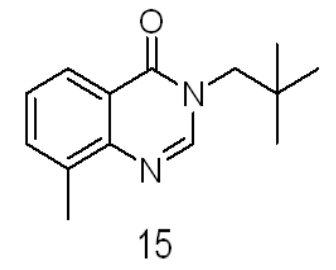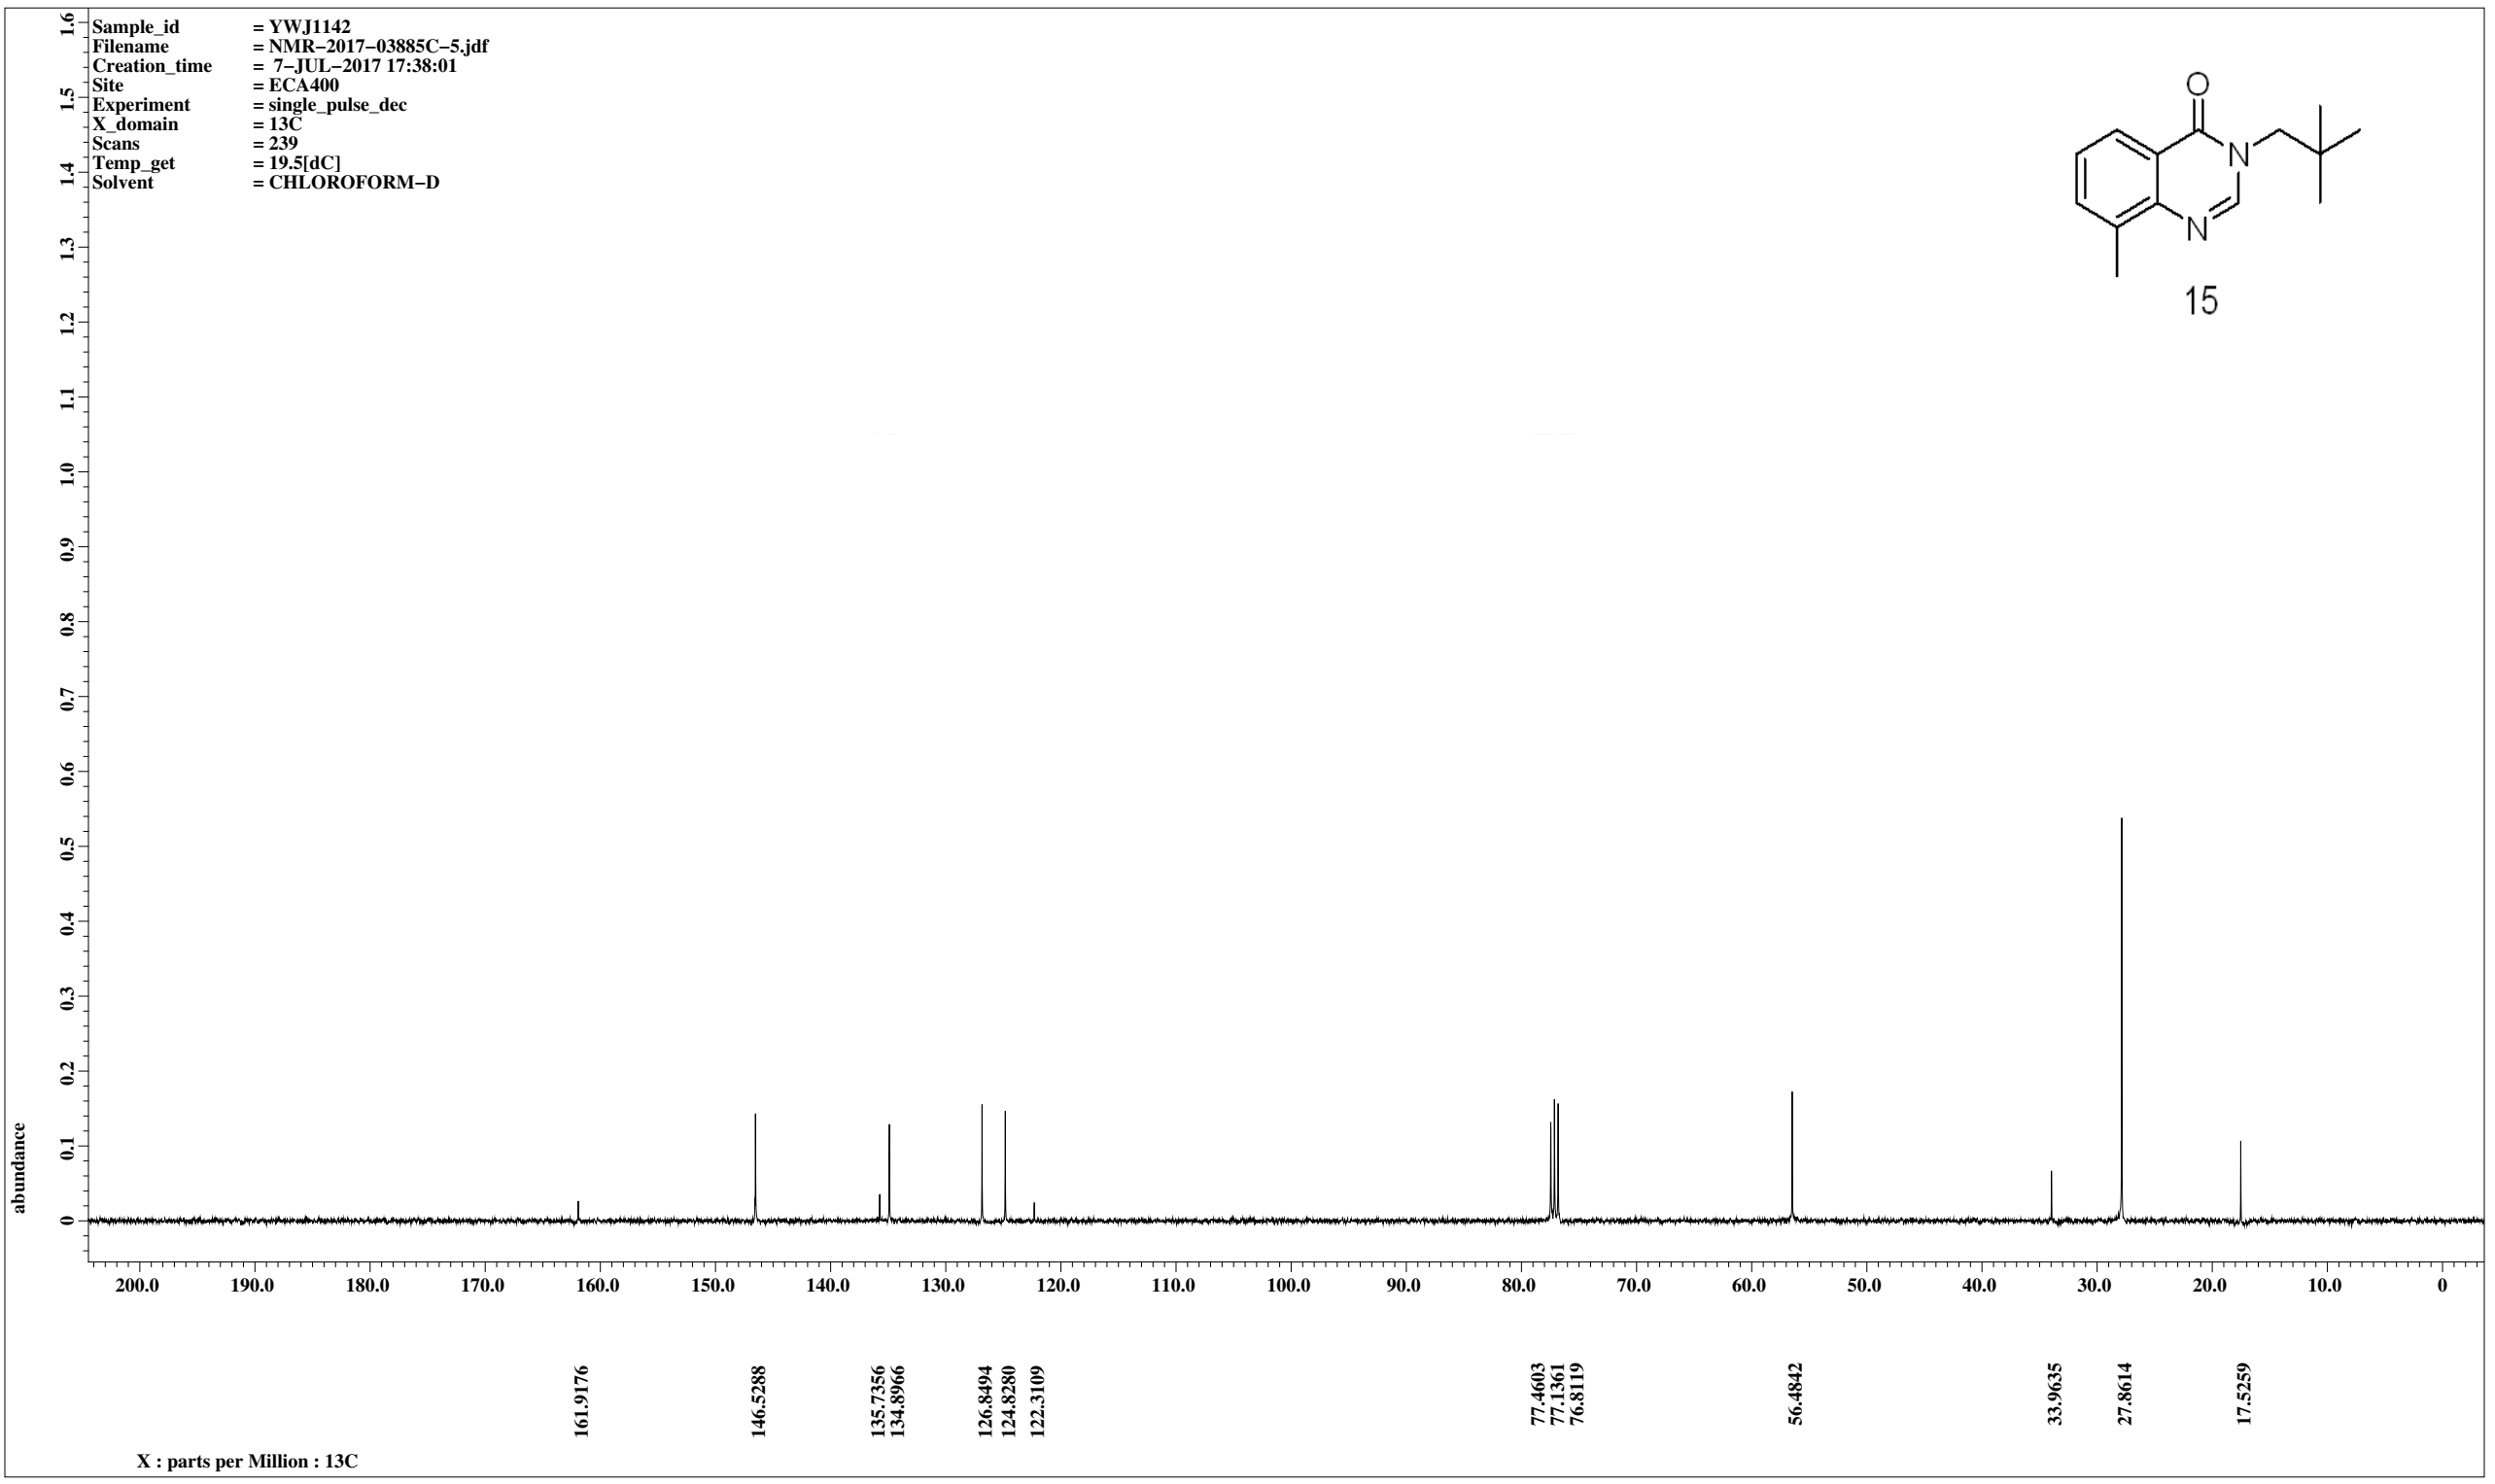

Sample\_id = YWJ1104  
Filename = NMR-2017-03296C-6.jdf  
Creation\_time = 5-JUN-2017 17:10:14  
Site = ECA400  
Experiment = single\_pulse\_dec  
X\_domain = 13C  
Scans = 765  
Temp\_get = 20.8[dC]  
Solvent = CHLOROFORM-D

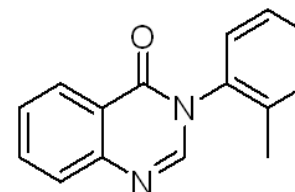

16

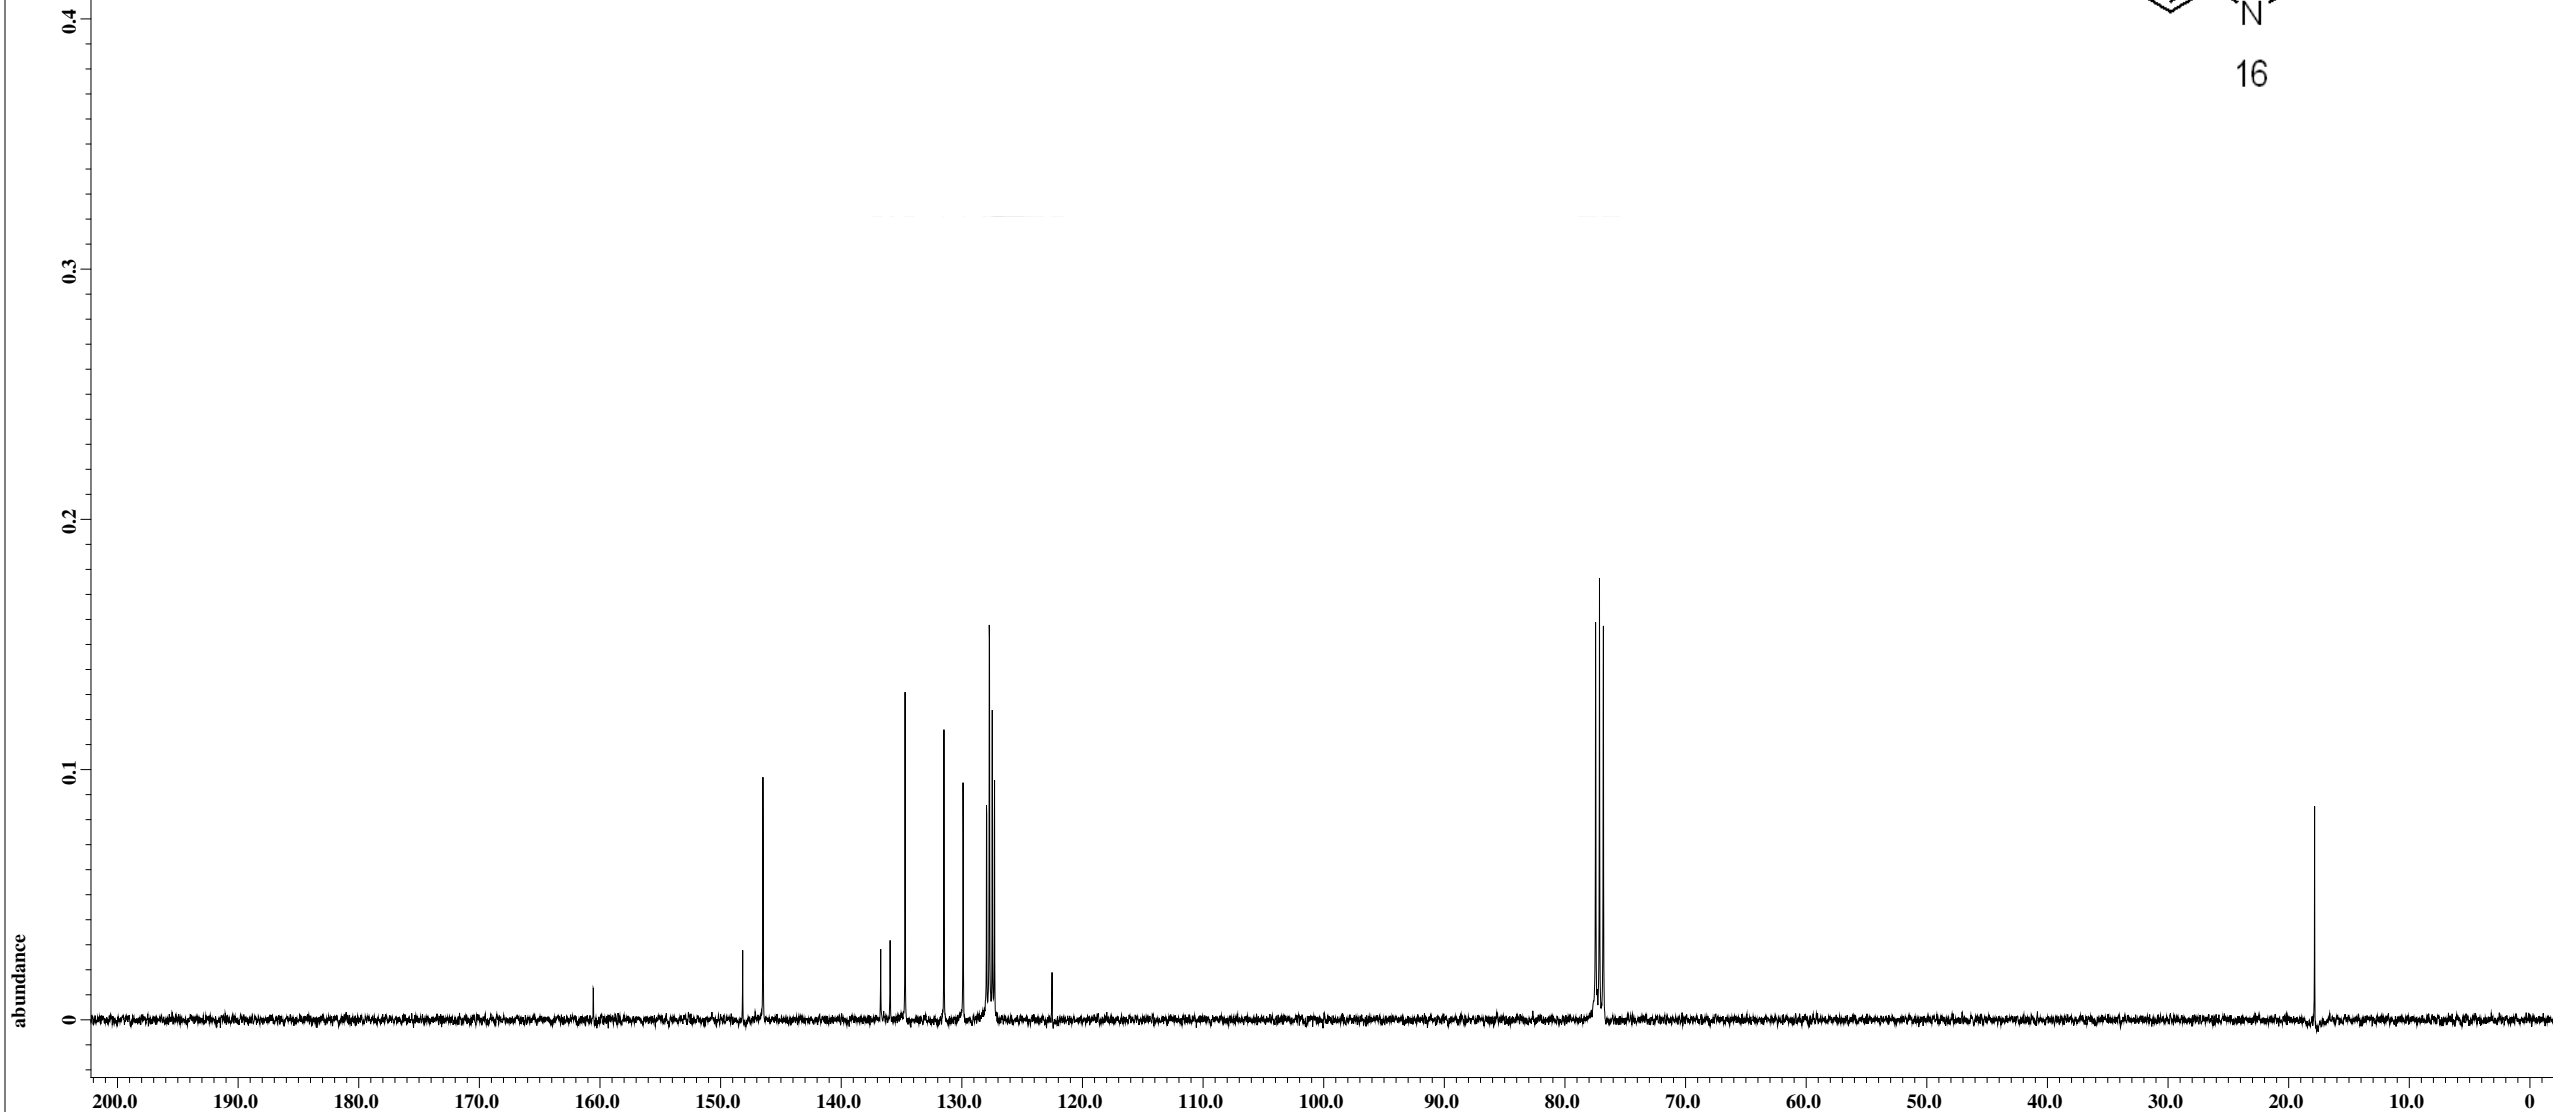

160.5637

148.1687  
146.4906

136.7272  
135.9454  
134.7059

131.4832  
129.9005  
127.9554  
127.7266  
127.4787  
127.2880  
122.5207

77.4603  
77.1361  
76.8119

17.8500

X : parts per Million : 13C

Sample\_id = YWJ1102  
Filename = NMR-2017-03294C-10.jdf  
Creation\_time = 5-JUN-2017 15:47:07  
Site = ECA400  
Experiment = single\_pulse\_dec  
X\_domain = 13C  
Scans = 629  
Temp\_get = 20.5[dC]  
Solvent = CHLOROFORM-D

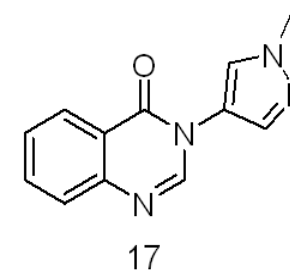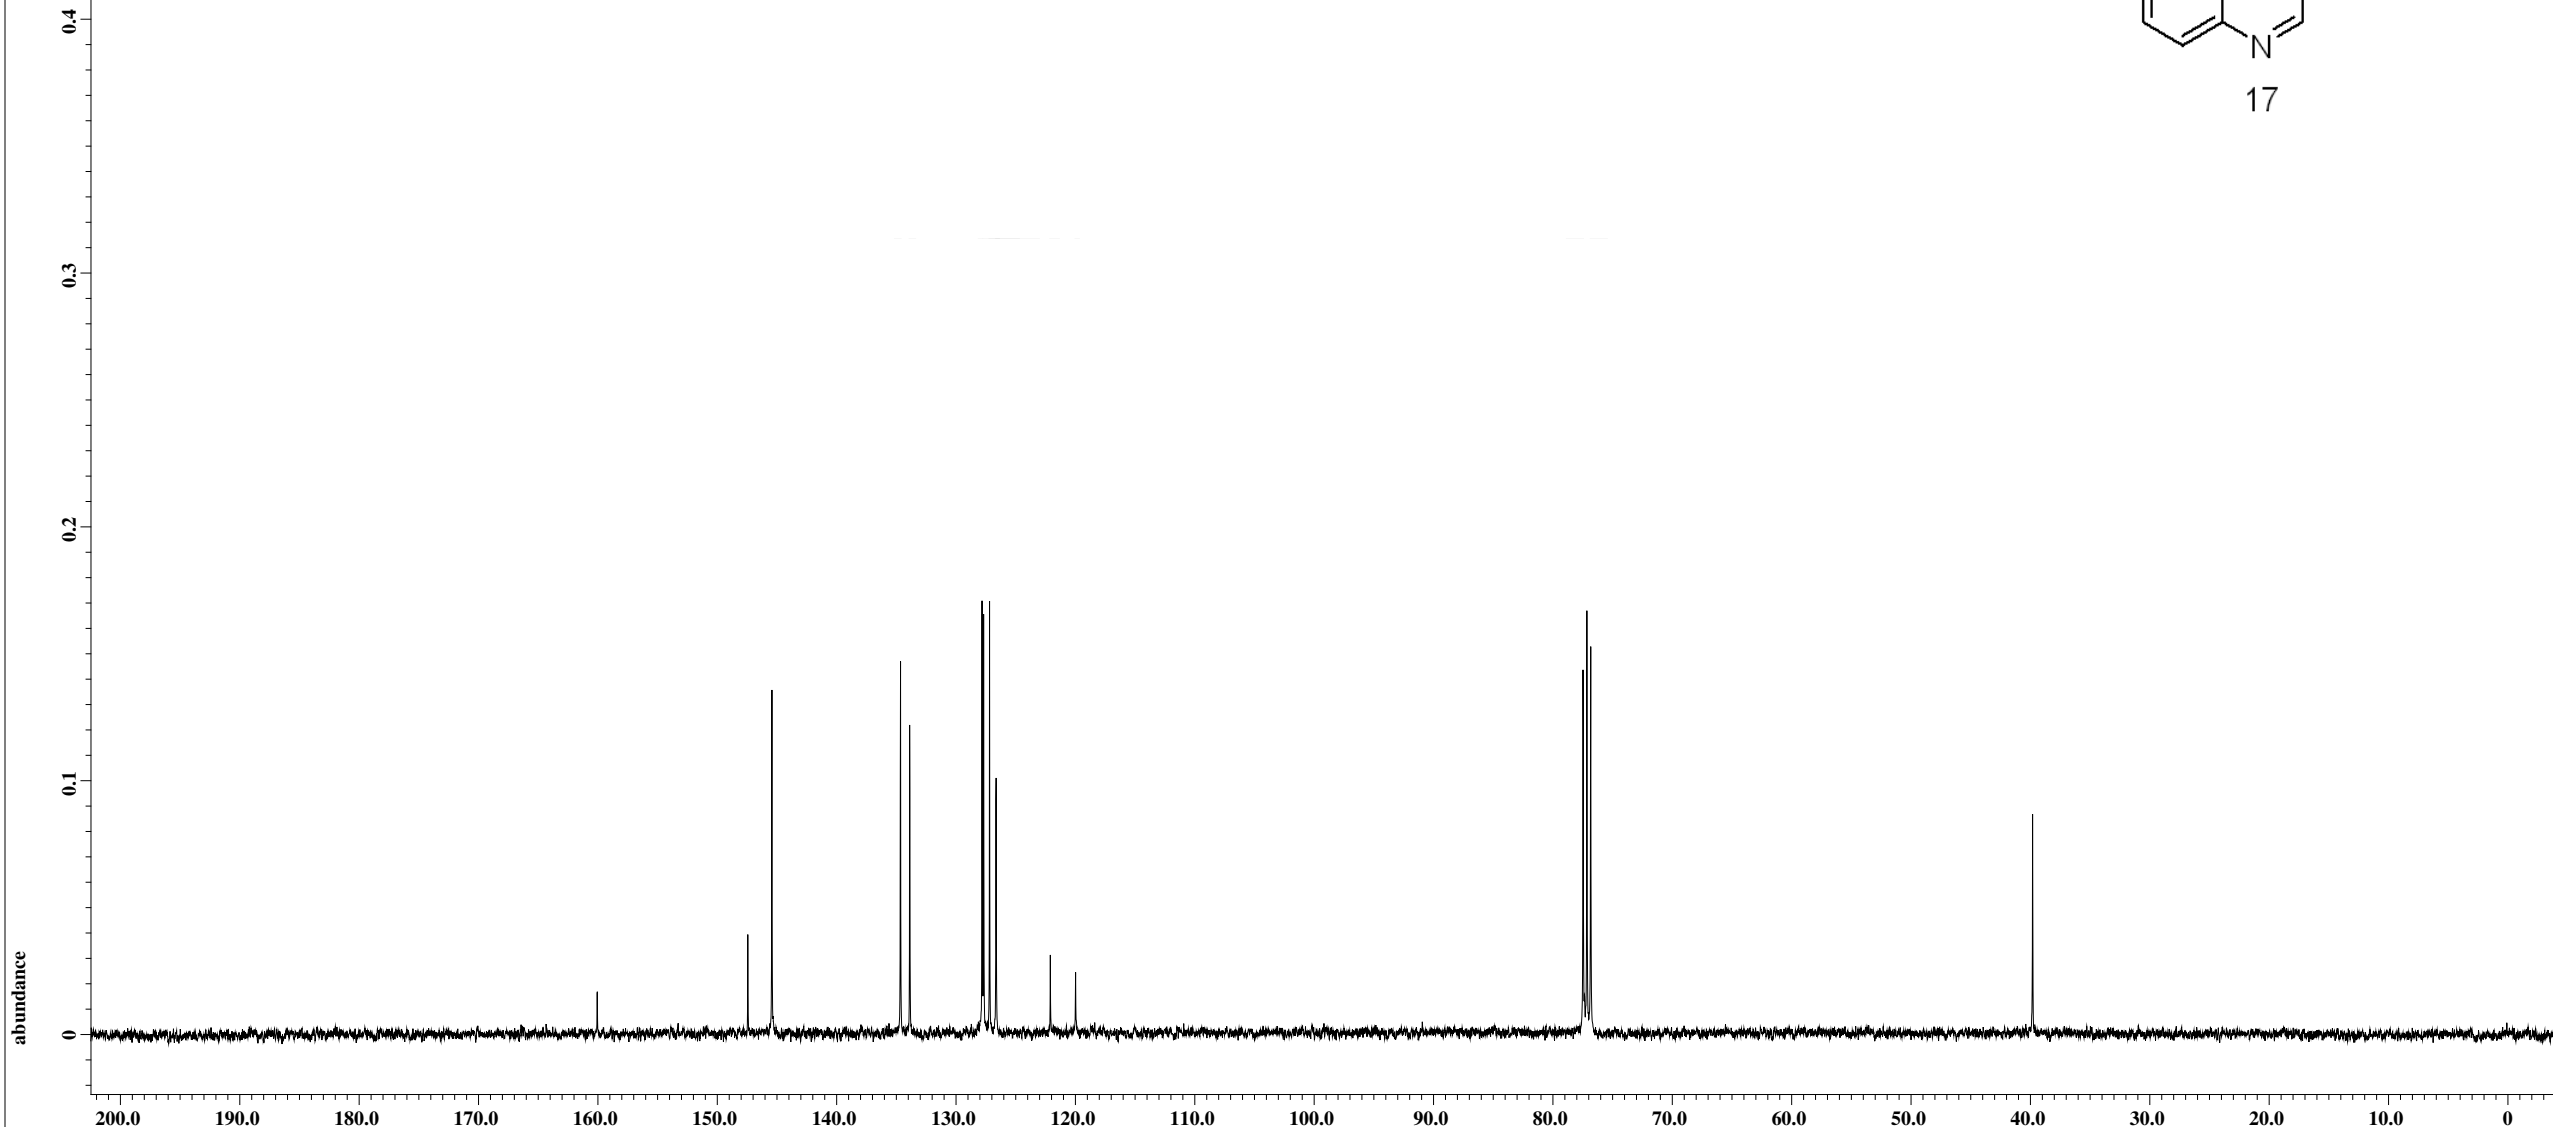

160.0488

147.4441  
145.4227

134.6487  
133.8859

127.8219  
127.6884  
127.1926  
126.6396  
122.1012  
119.9845

77.4793  
77.1551  
76.8310

39.8177

X : parts per Million : 13C

Sample\_id = YWJ1105  
Filename = NMR-2017-03297C-6.jdf  
Creation\_time = 5-JUN-2017 17:51:22  
Site = ECA400  
Experiment = single\_pulse\_dec  
X\_domain = 13C  
Scans = 1000  
Temp\_get = 20.6[ $^{\circ}$ C]  
Solvent = CHLOROFORM-D

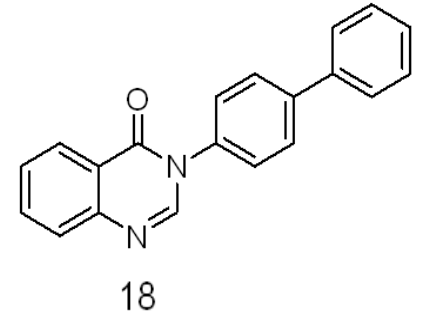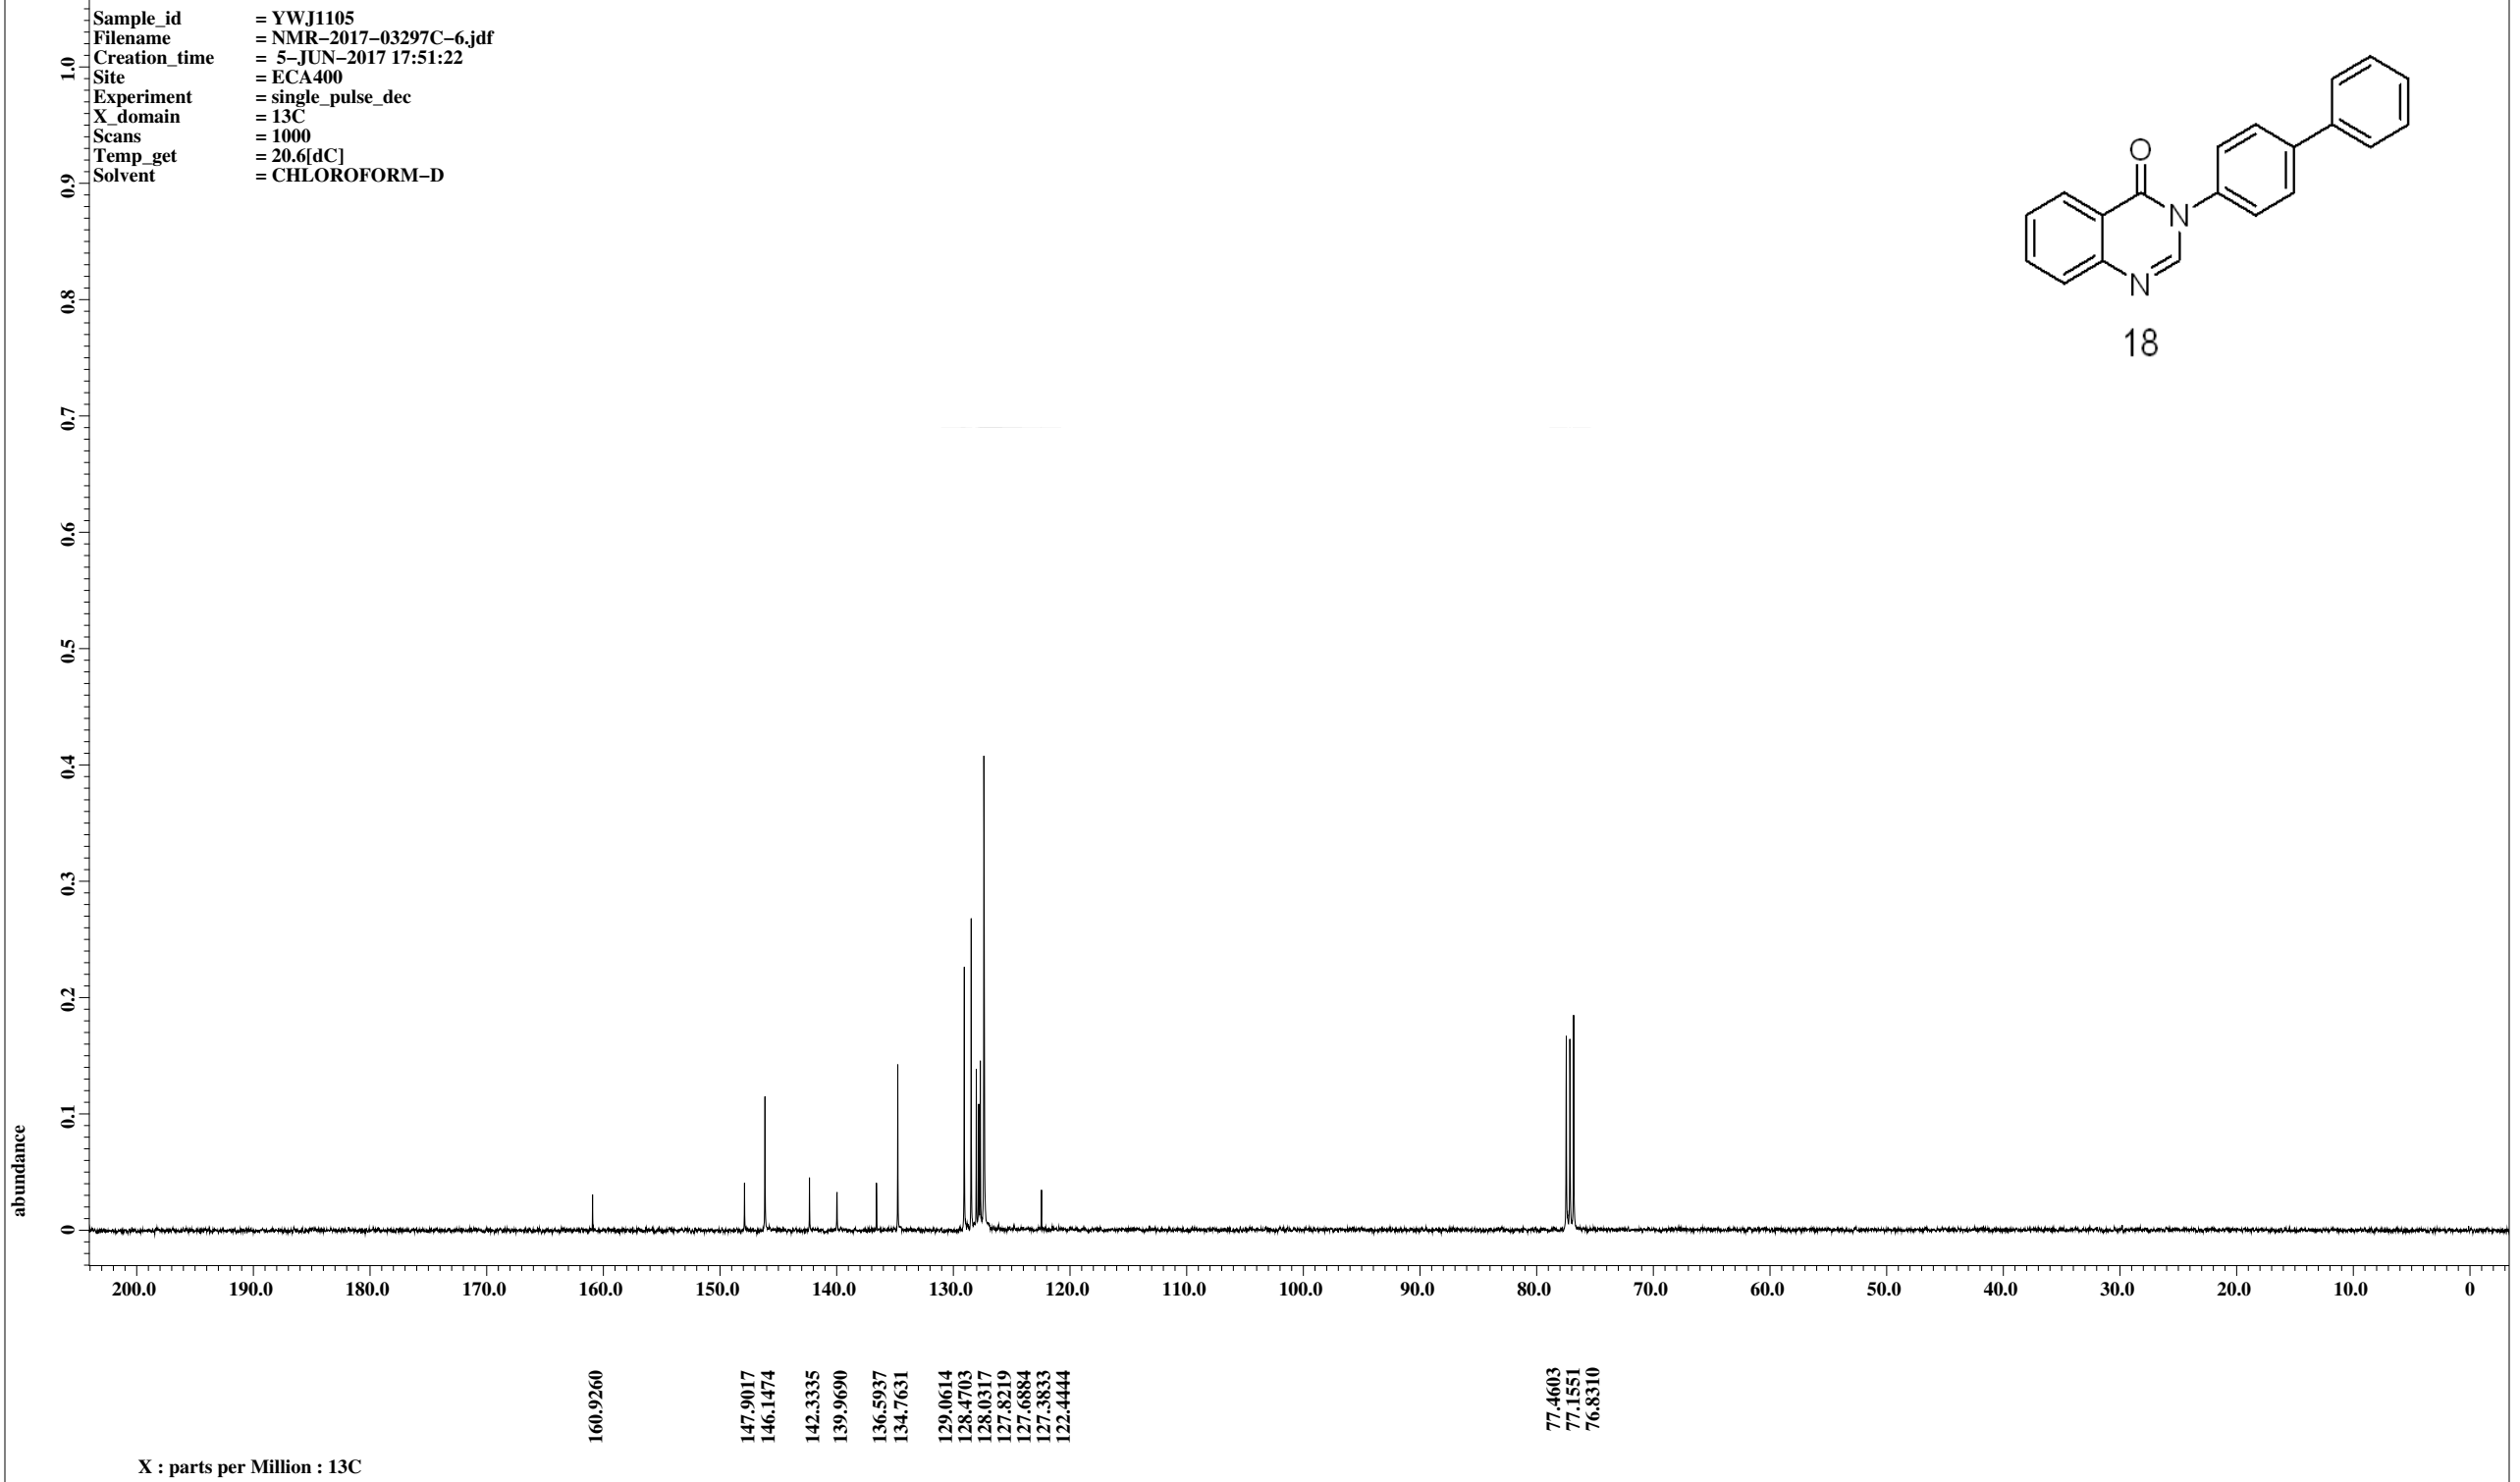



Sample\_id = YWJ1115  
Filename = NMR-2017-03542\_copy-11.jdf  
Creation\_time = 19-JUN-2017 09:13:38  
Site = ECA400  
Experiment = single\_pulse\_dec  
X\_domain = 13C  
Scans = 374  
Temp\_get = 20.3[dC]  
Solvent = CHLOROFORM-D

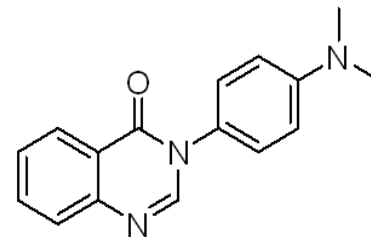

19

abundance

0.6  
0.5  
0.4  
0.3  
0.2  
0.1  
0

200.0 190.0 180.0 170.0 160.0 150.0 140.0 130.0 120.0 110.0 100.0 90.0 80.0 70.0 60.0 50.0 40.0 30.0 20.0 10.0 0

161.4027

150.7240  
148.0543  
147.0818

134.4008

127.6121  
127.5549  
127.4787  
127.2498  
126.1057  
122.5588

112.6047

77.4984  
77.1742  
76.8500

40.5996

X : parts per Million : 13C

Sample\_id = YWJ1116  
Filename = NMR-2017-03543C-16.jdf  
Creation\_time = 19-JUN-2017 09:39:09  
Site = ECA400  
Experiment = single\_pulse\_dec  
X\_domain = 13C  
Scans = 706  
Temp\_get = 20.4[dC]  
Solvent = CHLOROFORM-D

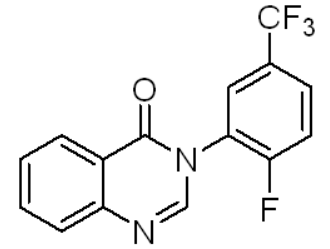

20

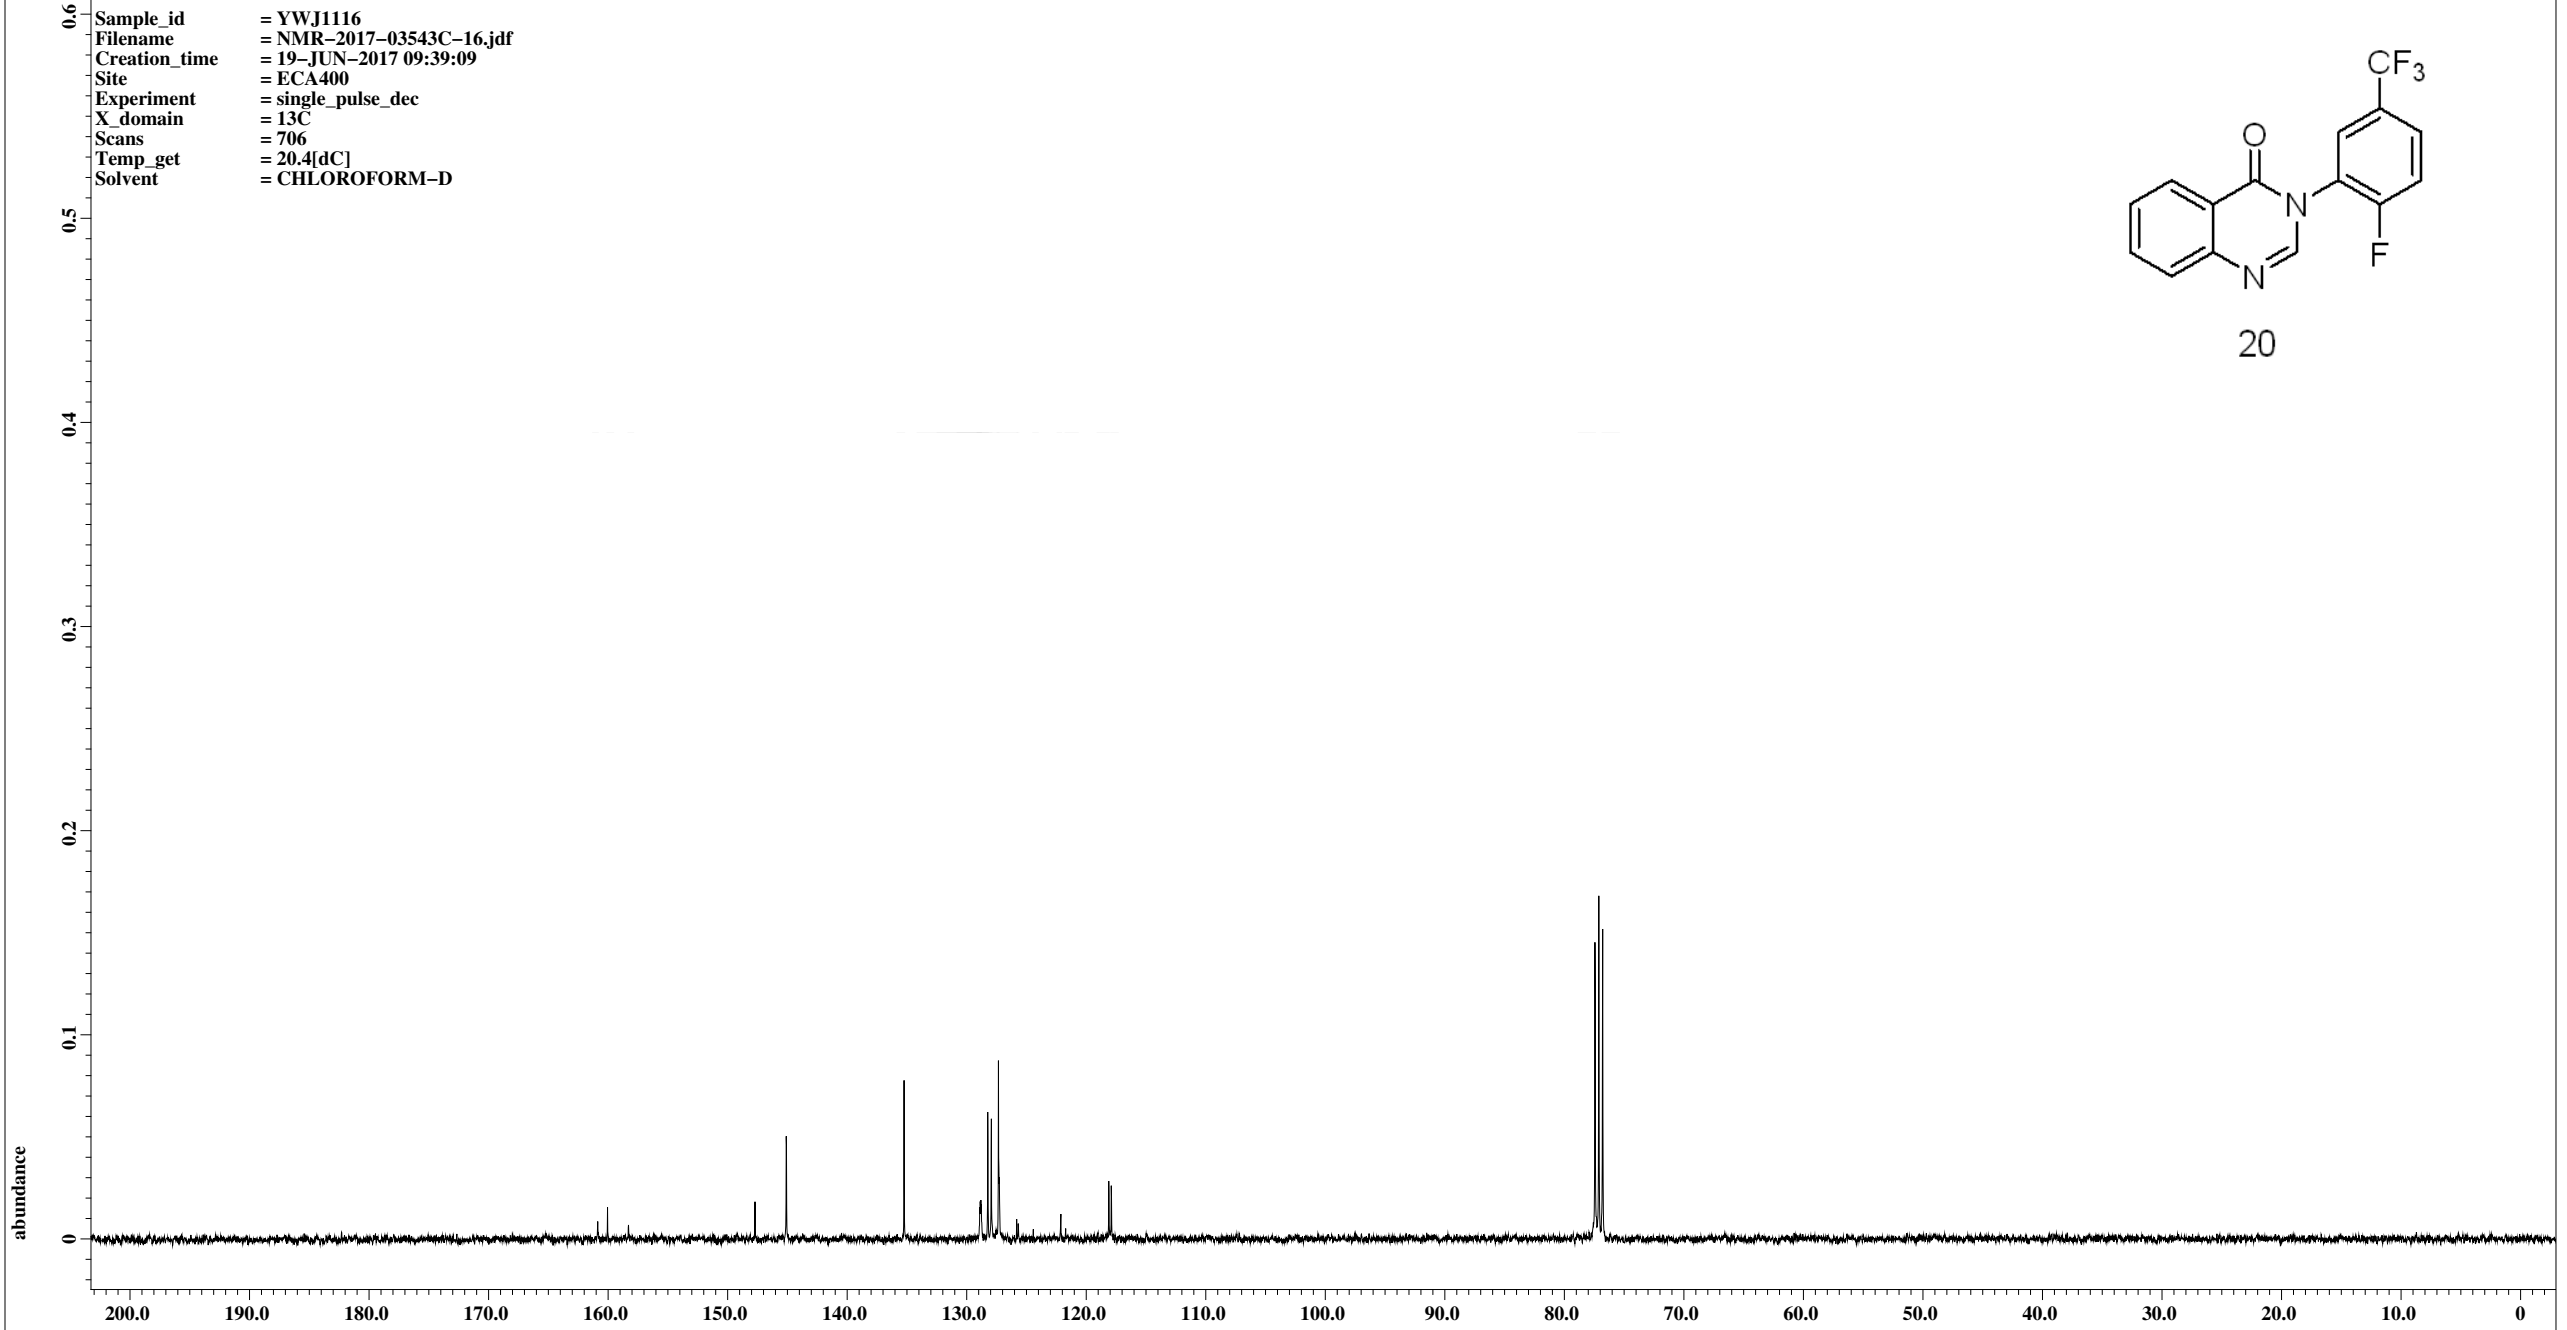

160.8688  
160.0488  
158.2944

147.7110  
145.0986

135.2398  
128.8135  
128.2414  
127.9363  
127.3452  
125.8196  
125.6862  
124.4276  
122.1202  
121.7198  
118.1157  
117.9059

77.4412  
77.1170  
76.7928

X : parts per Million : 13C

Sample\_id = YWJ1107  
Filename = NMR-2017-03299C-10.jdf  
Creation\_time = 6-JUN-2017 08:43:30  
Site = ECA400  
Experiment = single\_pulse\_dec  
X\_domain = 13C  
Scans = 592  
Temp\_get = 19.1[dC]  
Solvent = CHLOROFORM-D

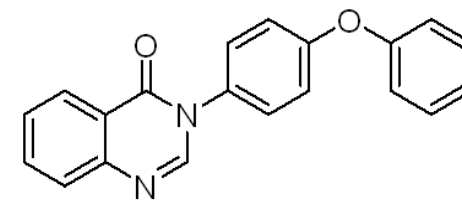

21

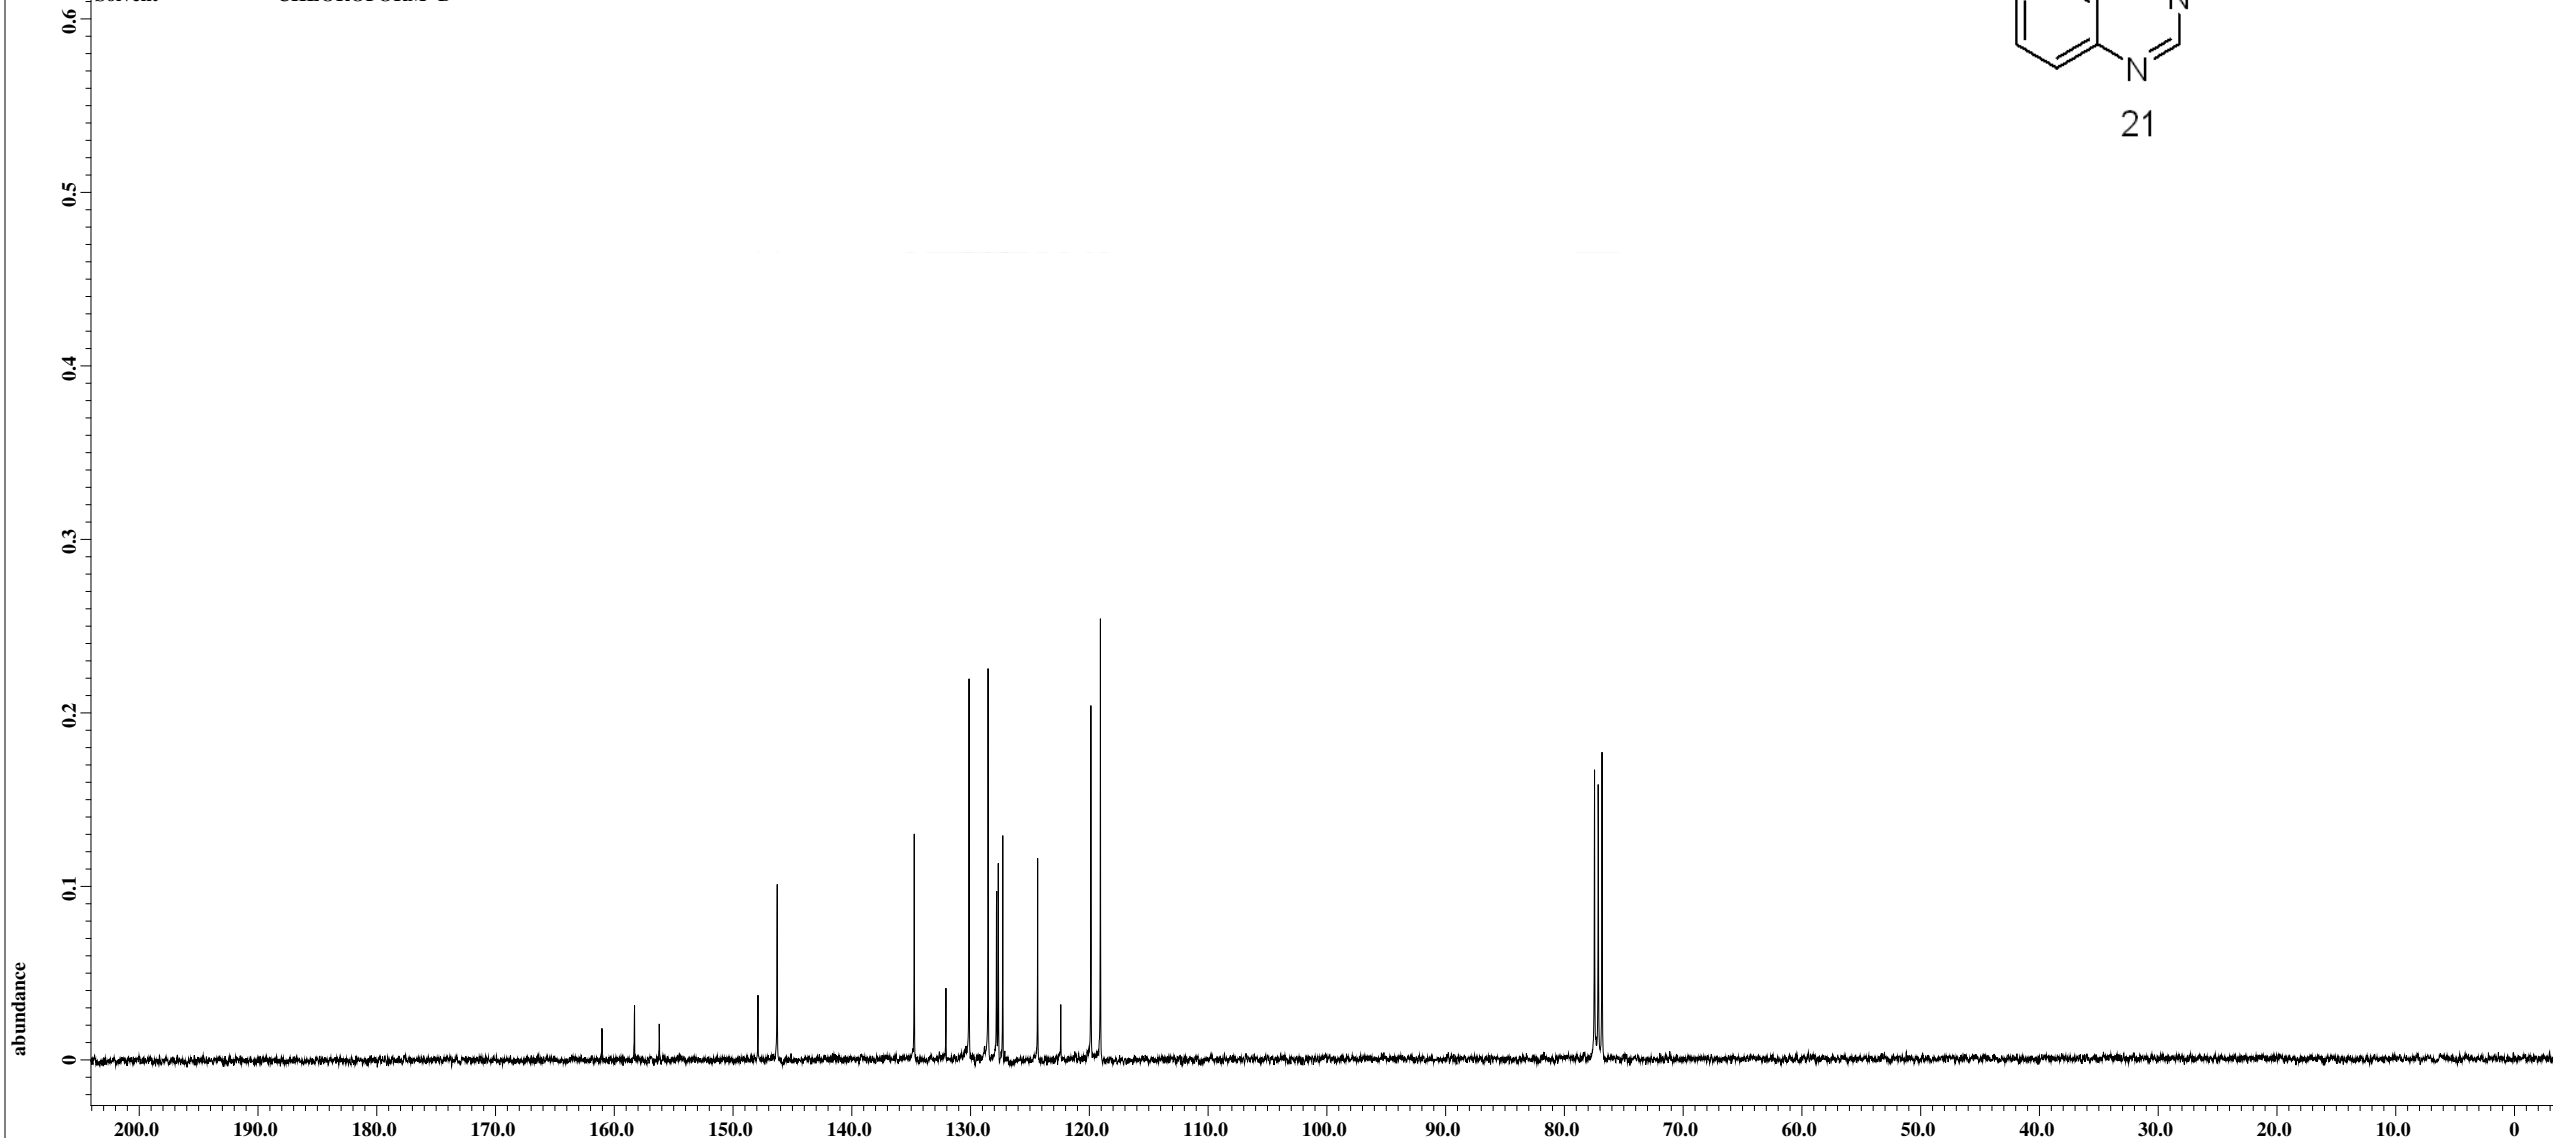

161.0404  
158.2944  
156.2159  
  
147.9017  
146.2809  
  
134.7440  
132.0743  
130.1293  
128.5275  
127.8028  
127.6694  
127.2880  
124.3513  
122.4063  
119.8701  
119.0692  
  
77.4603  
77.1551  
76.8310

X : parts per Million : 13C

Sample\_id = YWJ1111  
Filename = NMR-2017-03880C-8.jdf  
Creation\_time = 7-JUL-2017 10:43:46  
Site = ECA400  
Experiment = single\_pulse\_dec  
X\_domain = 13C  
Scans = 432  
Temp\_get = 18.7[dC]  
Solvent = DMSO-D6

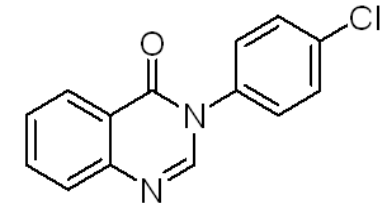

22

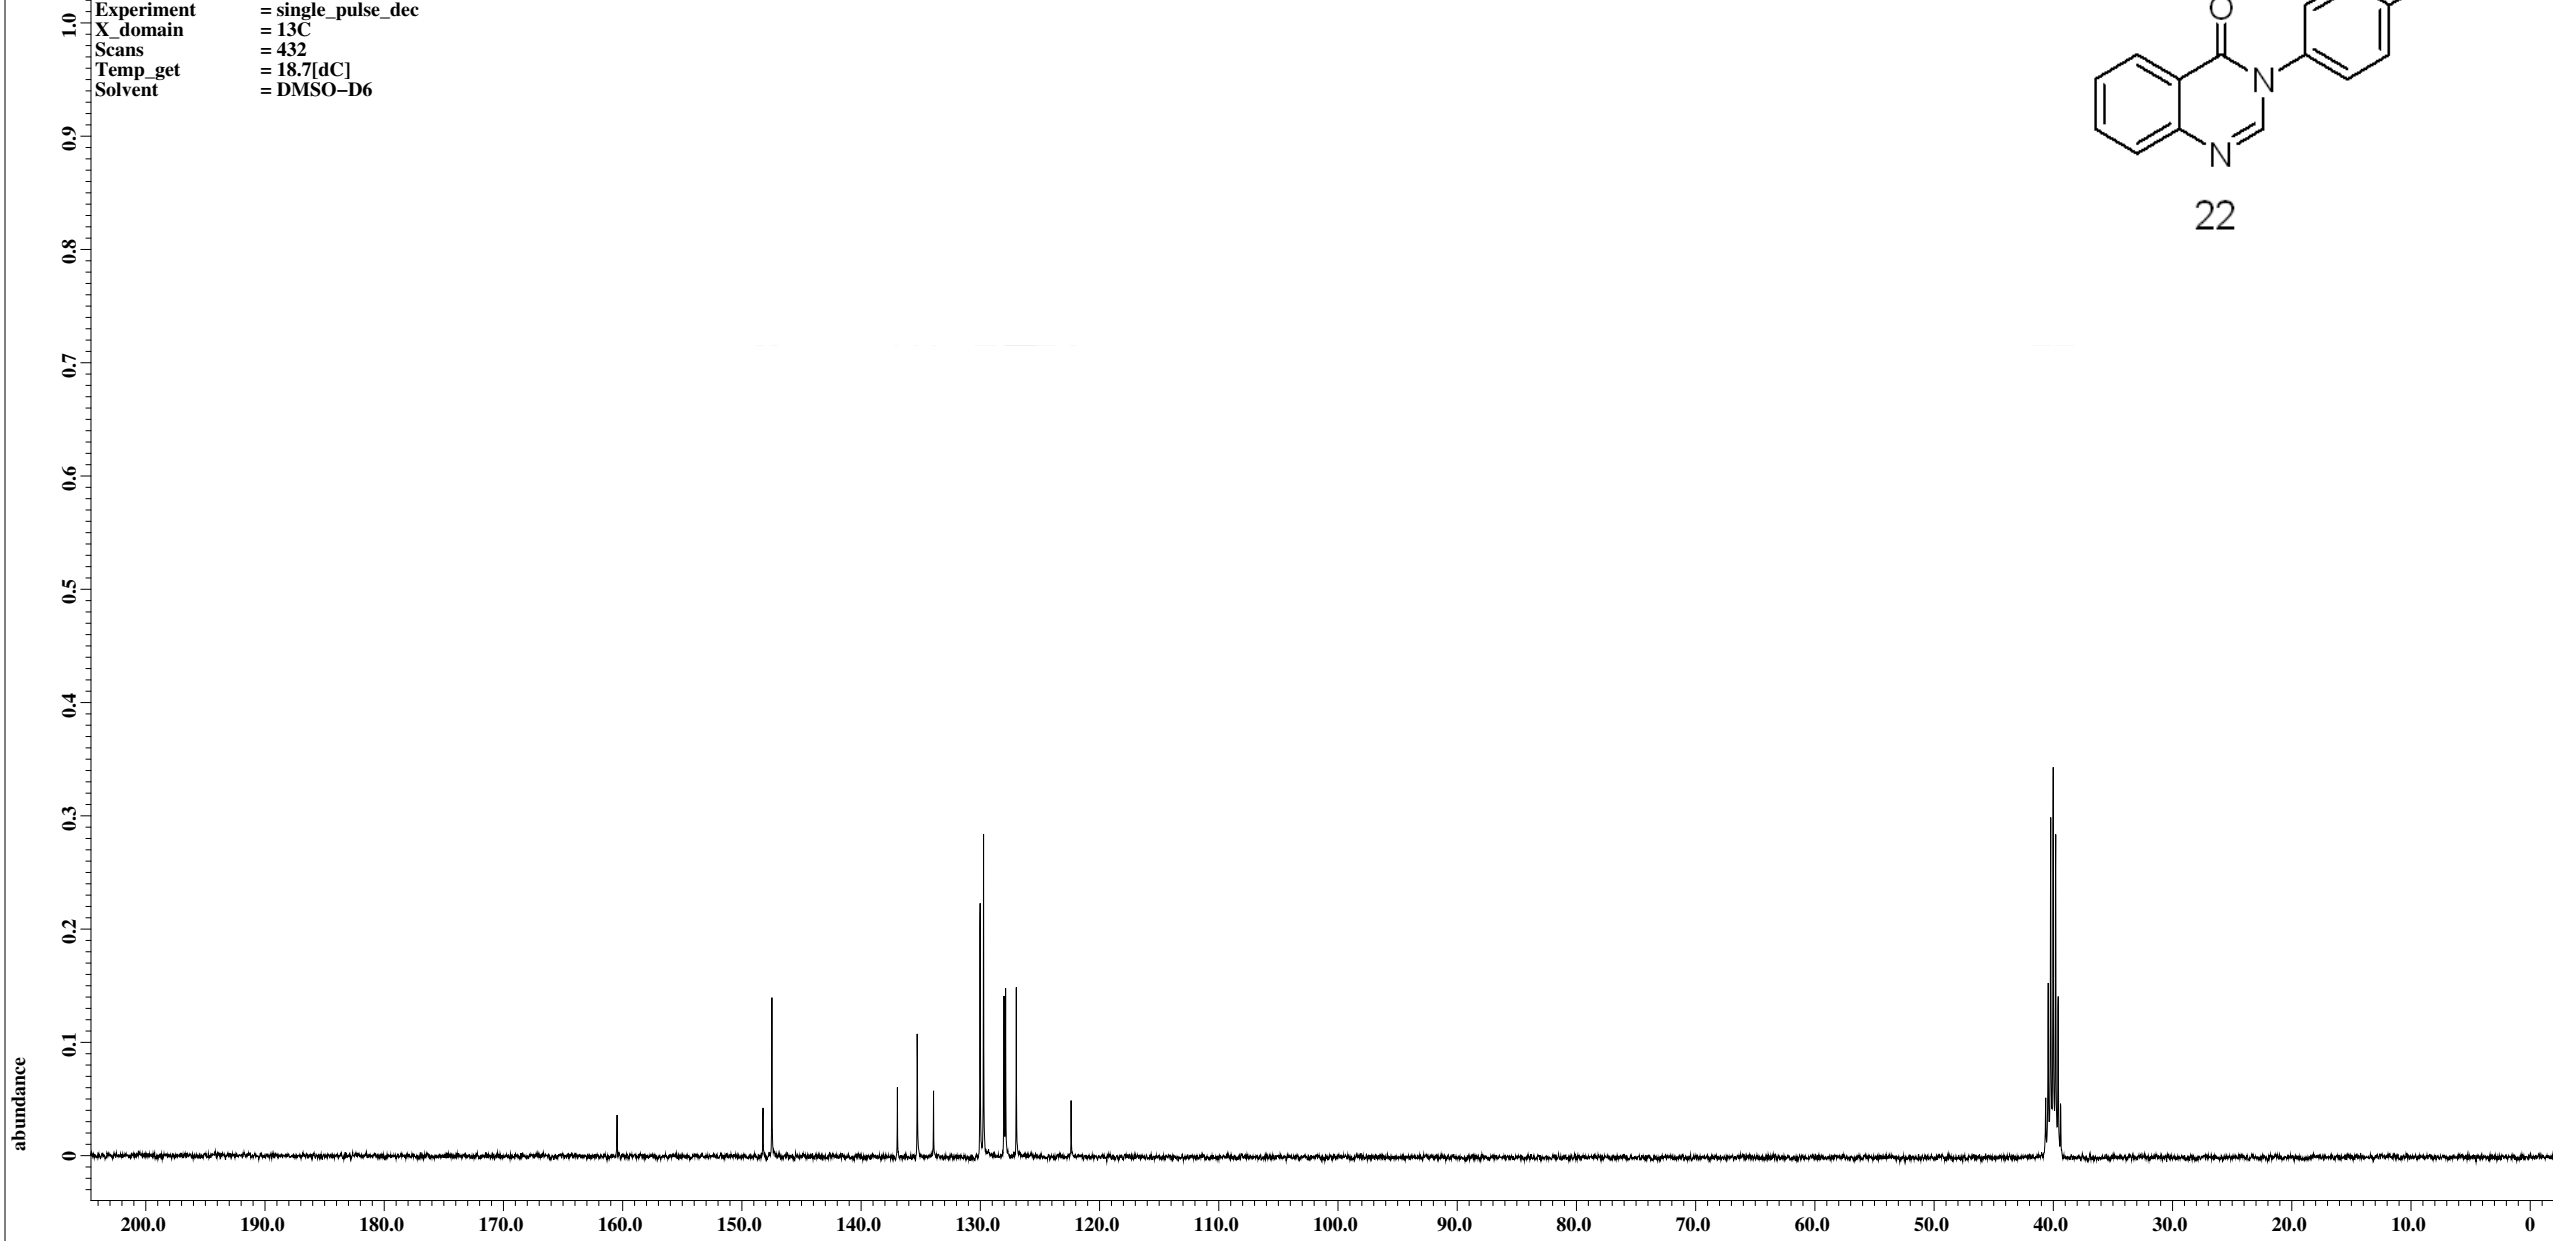

160.4683  
148.2259  
147.4822  
136.9560  
135.2970  
133.9240  
130.0149  
129.7288  
128.0126  
127.8791  
126.9829  
122.3872  
40.2182  
40.0084  
39.7987

X : parts per Million : 13C

Sample\_id = YWJ1124  
Filename = NMR-2017-03544C-8.jdf  
Creation\_time = 19-JUN-2017 09:56:31  
Site = ECA400  
Experiment = single\_pulse\_dec  
X\_domain = 13C  
Scans = 508  
Temp\_get = 20.1[dC]  
Solvent = CHLOROFORM-D

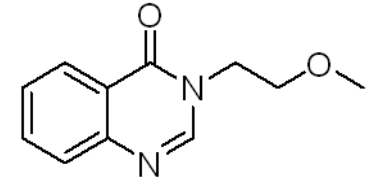

23

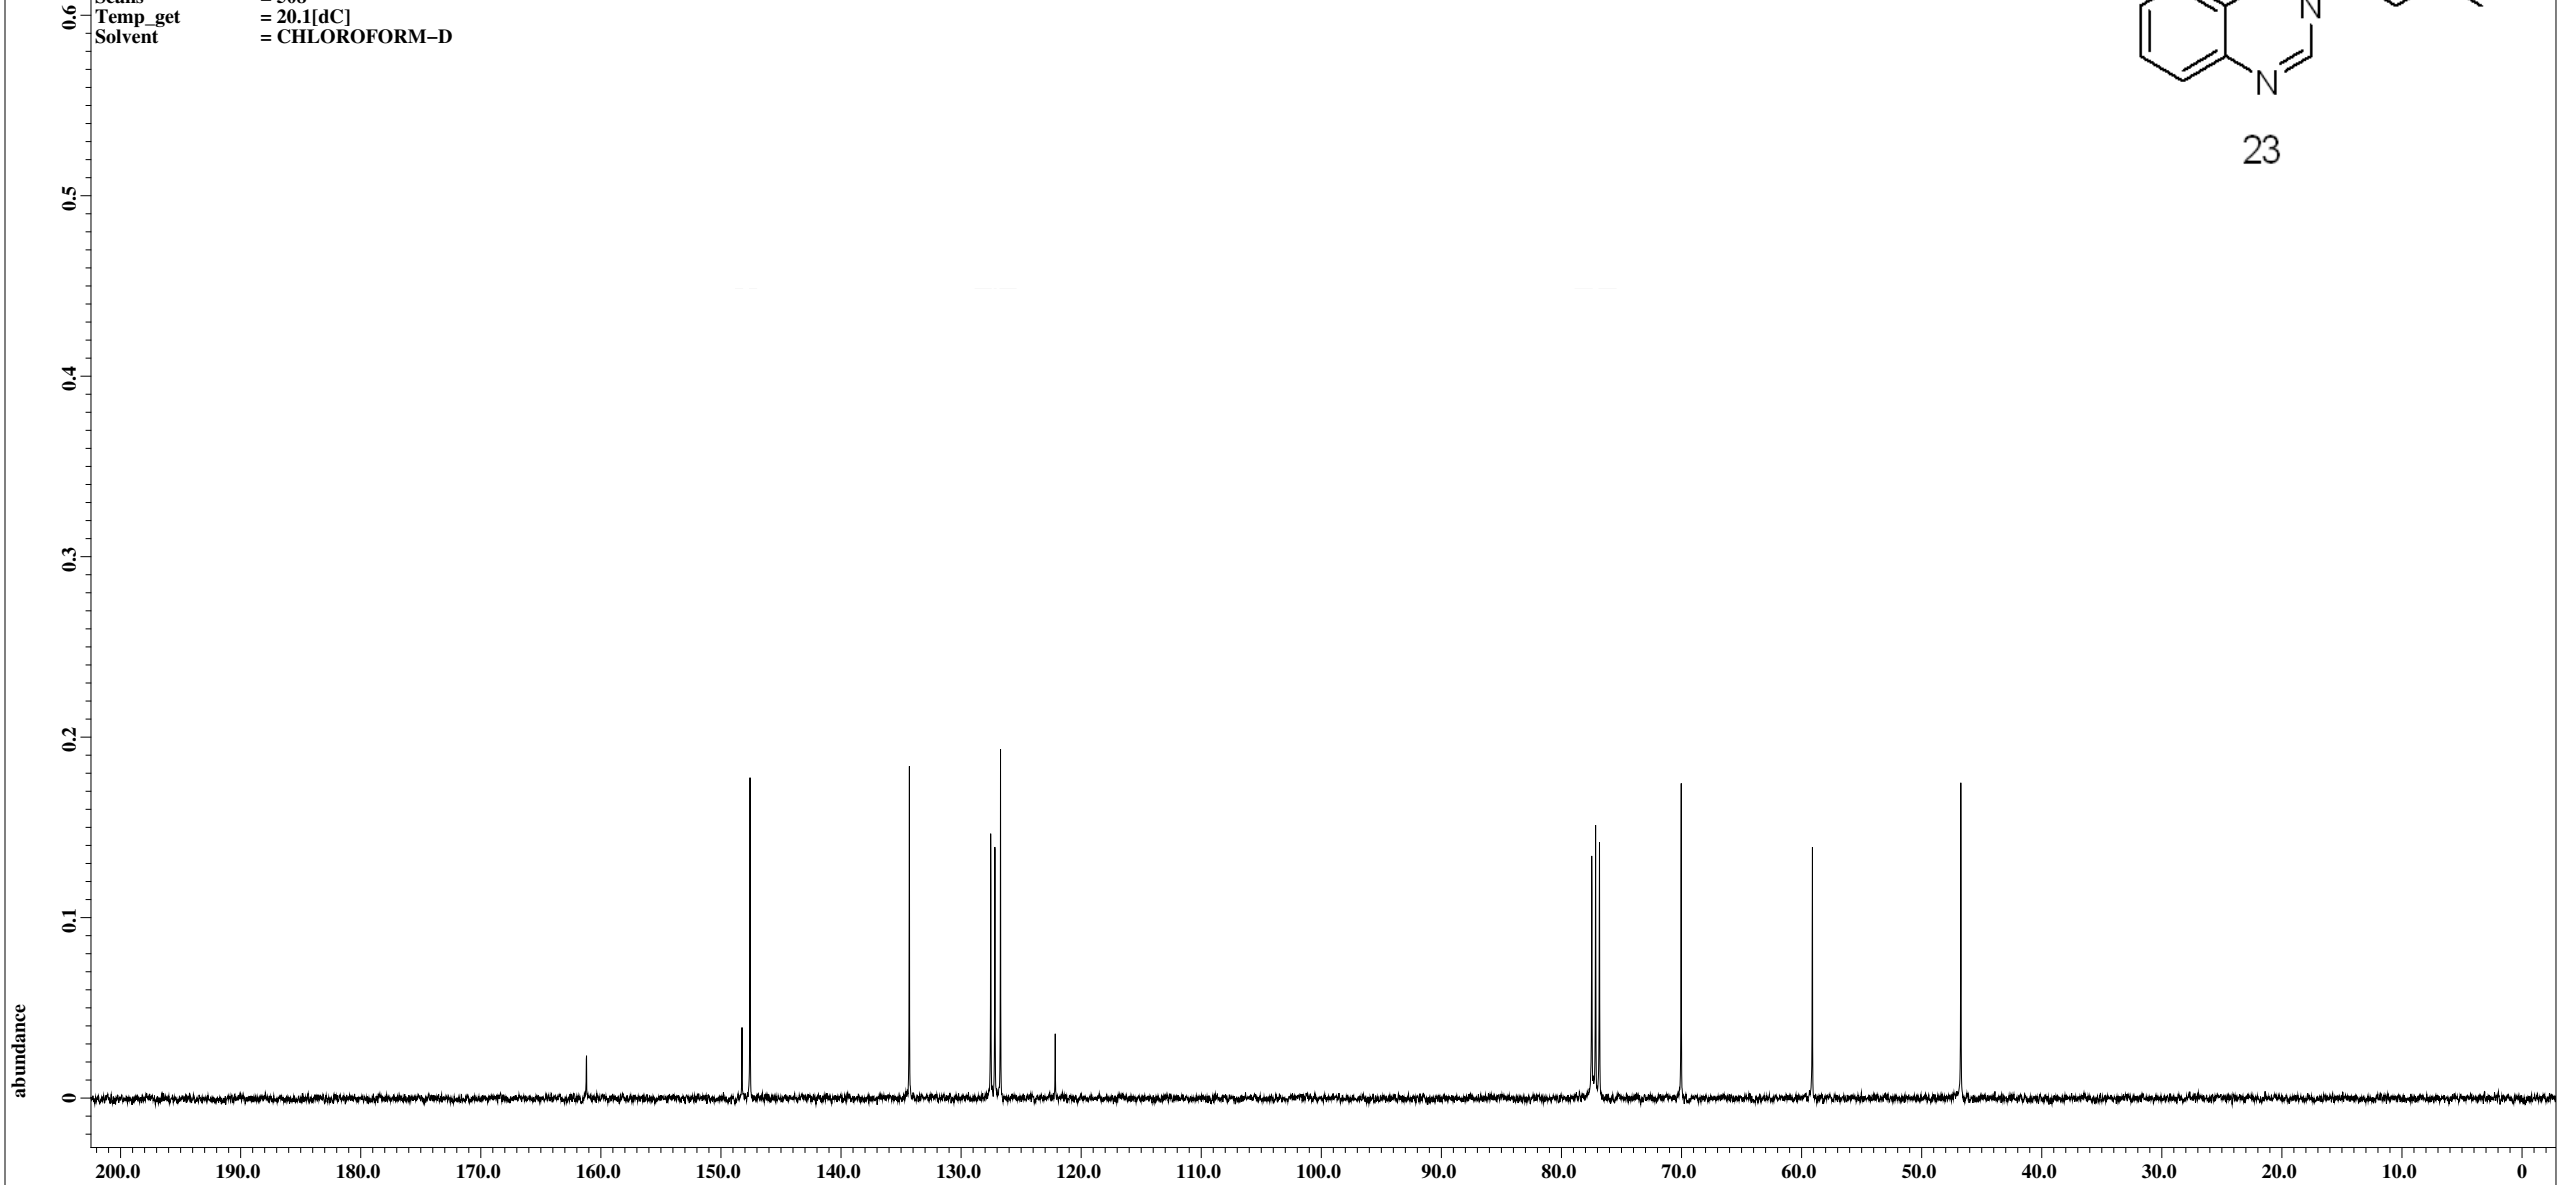

161.1929

148.2450  
147.5776

134.3054

127.5359  
127.1926  
126.7159

122.1584

77.4793  
77.1551  
76.8310

70.0233

59.0966

46.7398

X : parts per Million : 13C

Sample\_id = YWJ1125  
Filename = NMR-2017-03545C-5.jdf  
Creation\_time = 19-JUN-2017 10:14:05  
Site = ECA400  
Experiment = single\_pulse\_dec  
X\_domain = 13C  
Scans = 360  
Temp\_get = 19.7[dC]  
Solvent = CHLOROFORM-D

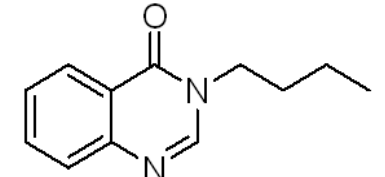

24

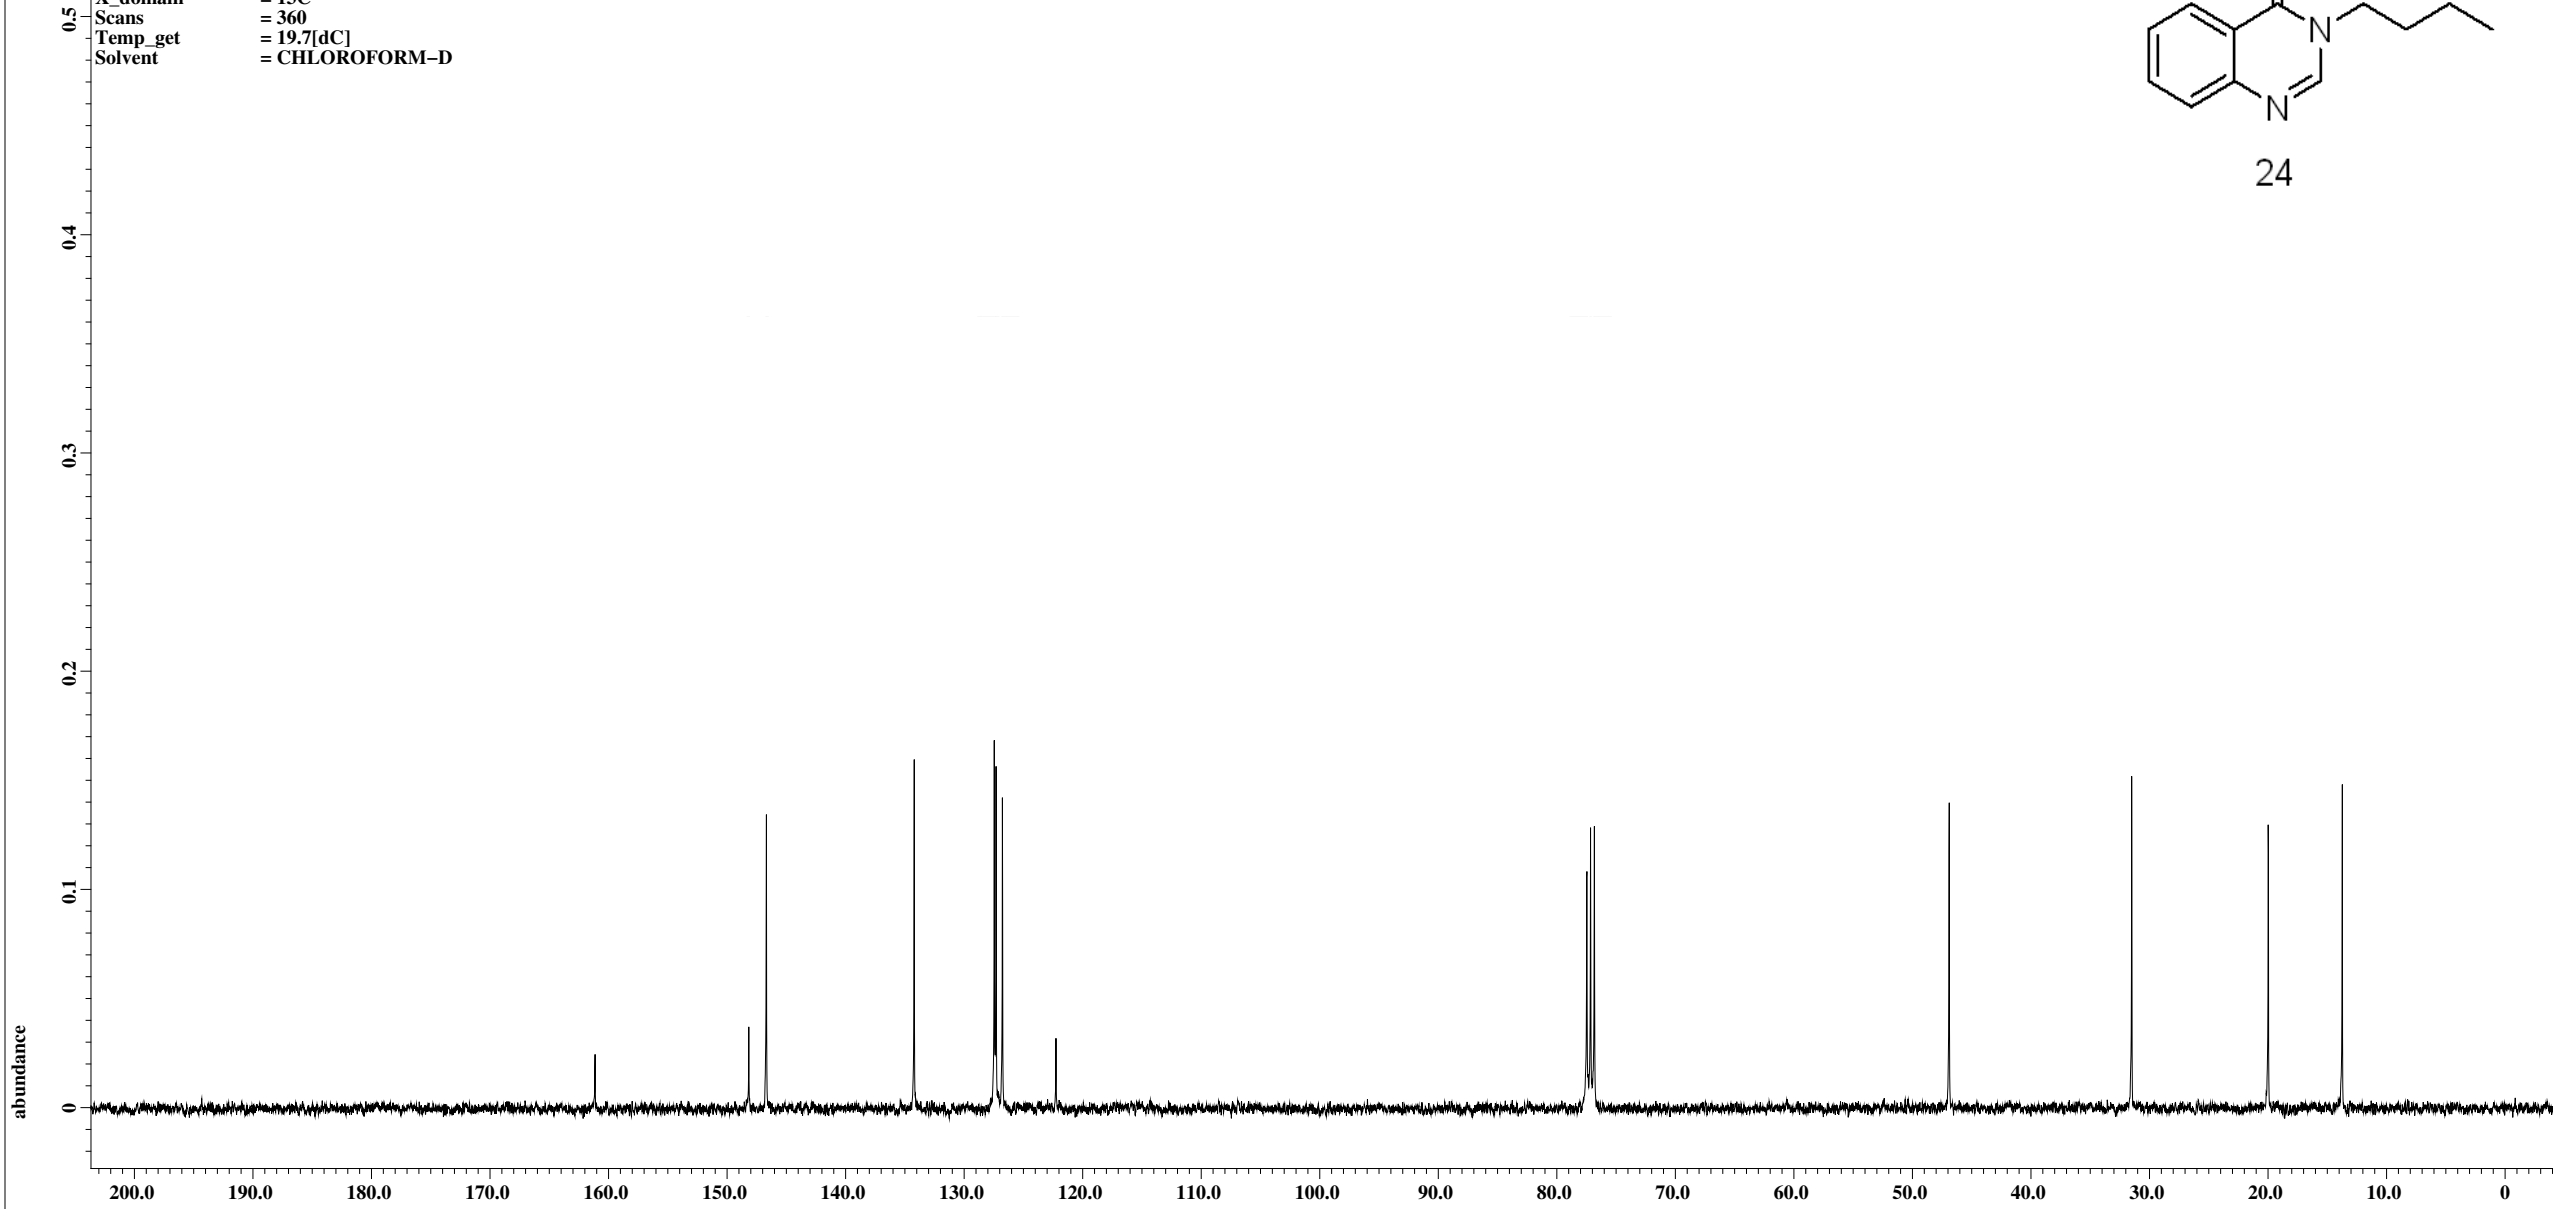

161.1357

148.1687  
146.6813

134.2101

127.4596  
127.3070  
126.7731

122.2537

77.4603  
77.1551  
76.8310

46.8924

31.5036

19.9858

13.7311

X : parts per Million : 13C

Sample\_id = YWJ1145  
Filename = NMR-2017-04113C-5.jdf  
Creation\_time = 19-JUL-2017 15:50:09  
Site = ECA400  
Experiment = single\_pulse\_dec  
X\_domain = 13C  
Scans = 1288  
Temp\_get = 19.9[dC]  
Solvent = CHLOROFORM-D

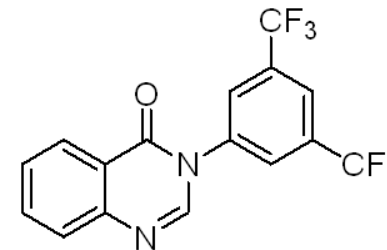

25

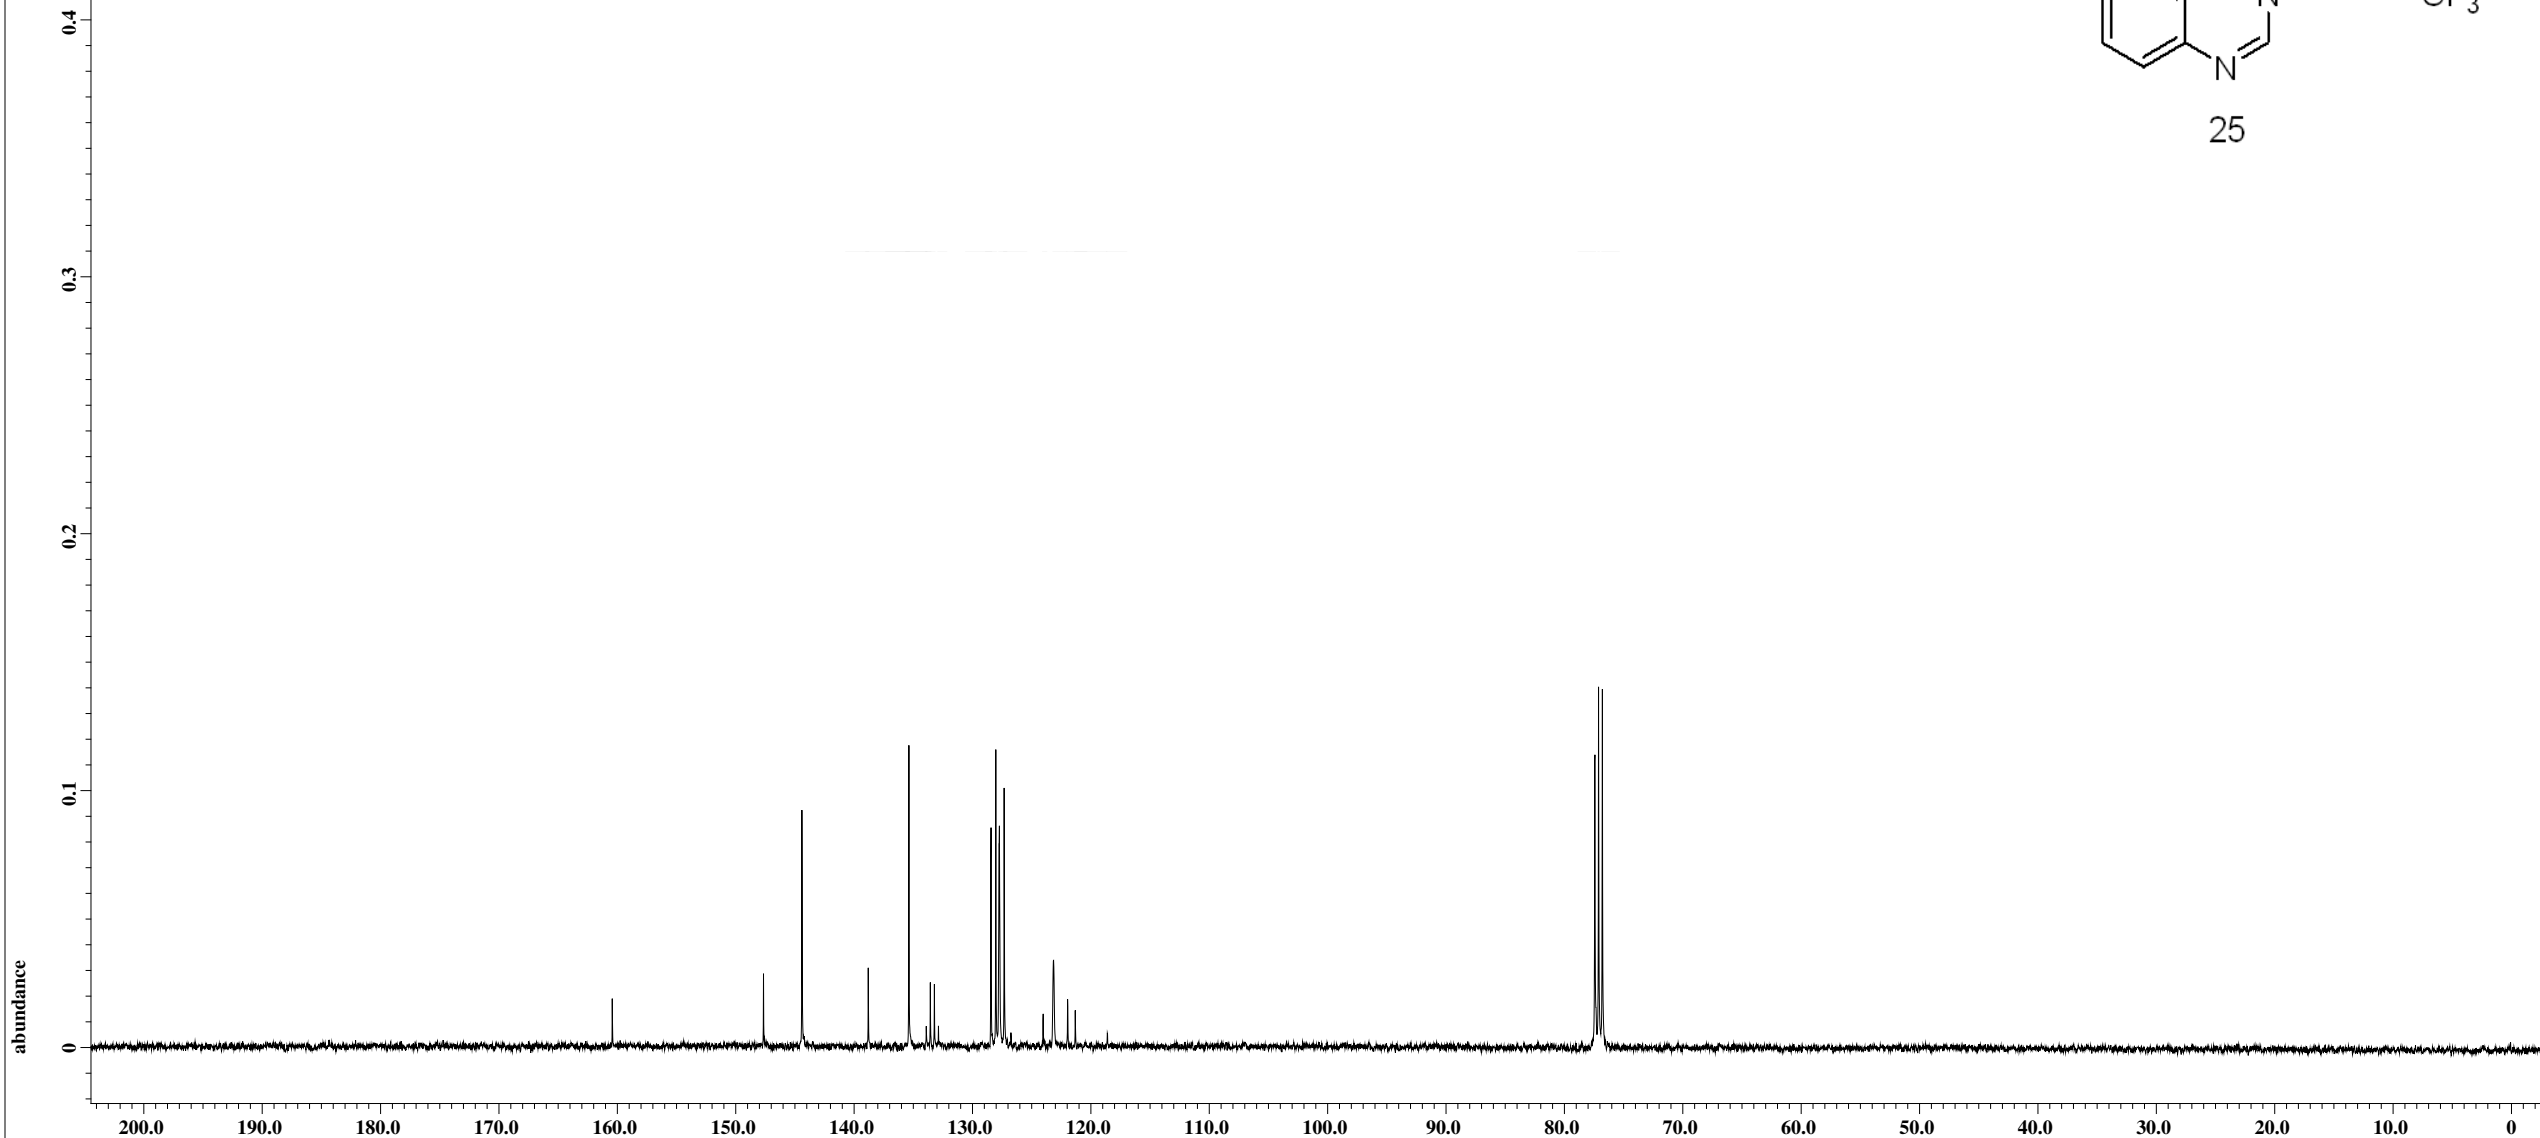

160.4302

147.6538

144.4121

138.8057

135.3733

133.9050

133.5617

133.2185

132.8752

128.4321

128.0317

127.7266

127.3261

124.0271

123.1500

121.9677

121.3193

118.6115

77.4221

77.1170

76.7928

X : parts per Million : 13C

Sample\_id = YWJ1146  
Filename = NMR-2017-04114C-3.jdf  
Creation\_time = 19-JUL-2017 16:44:40  
Site = ECA400  
Experiment = single\_pulse\_dec  
X\_domain = 13C  
Scans = 945.0  
Temp\_get = 20[dC]  
Solvent = CHLOROFORM-D

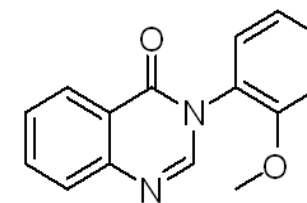

26

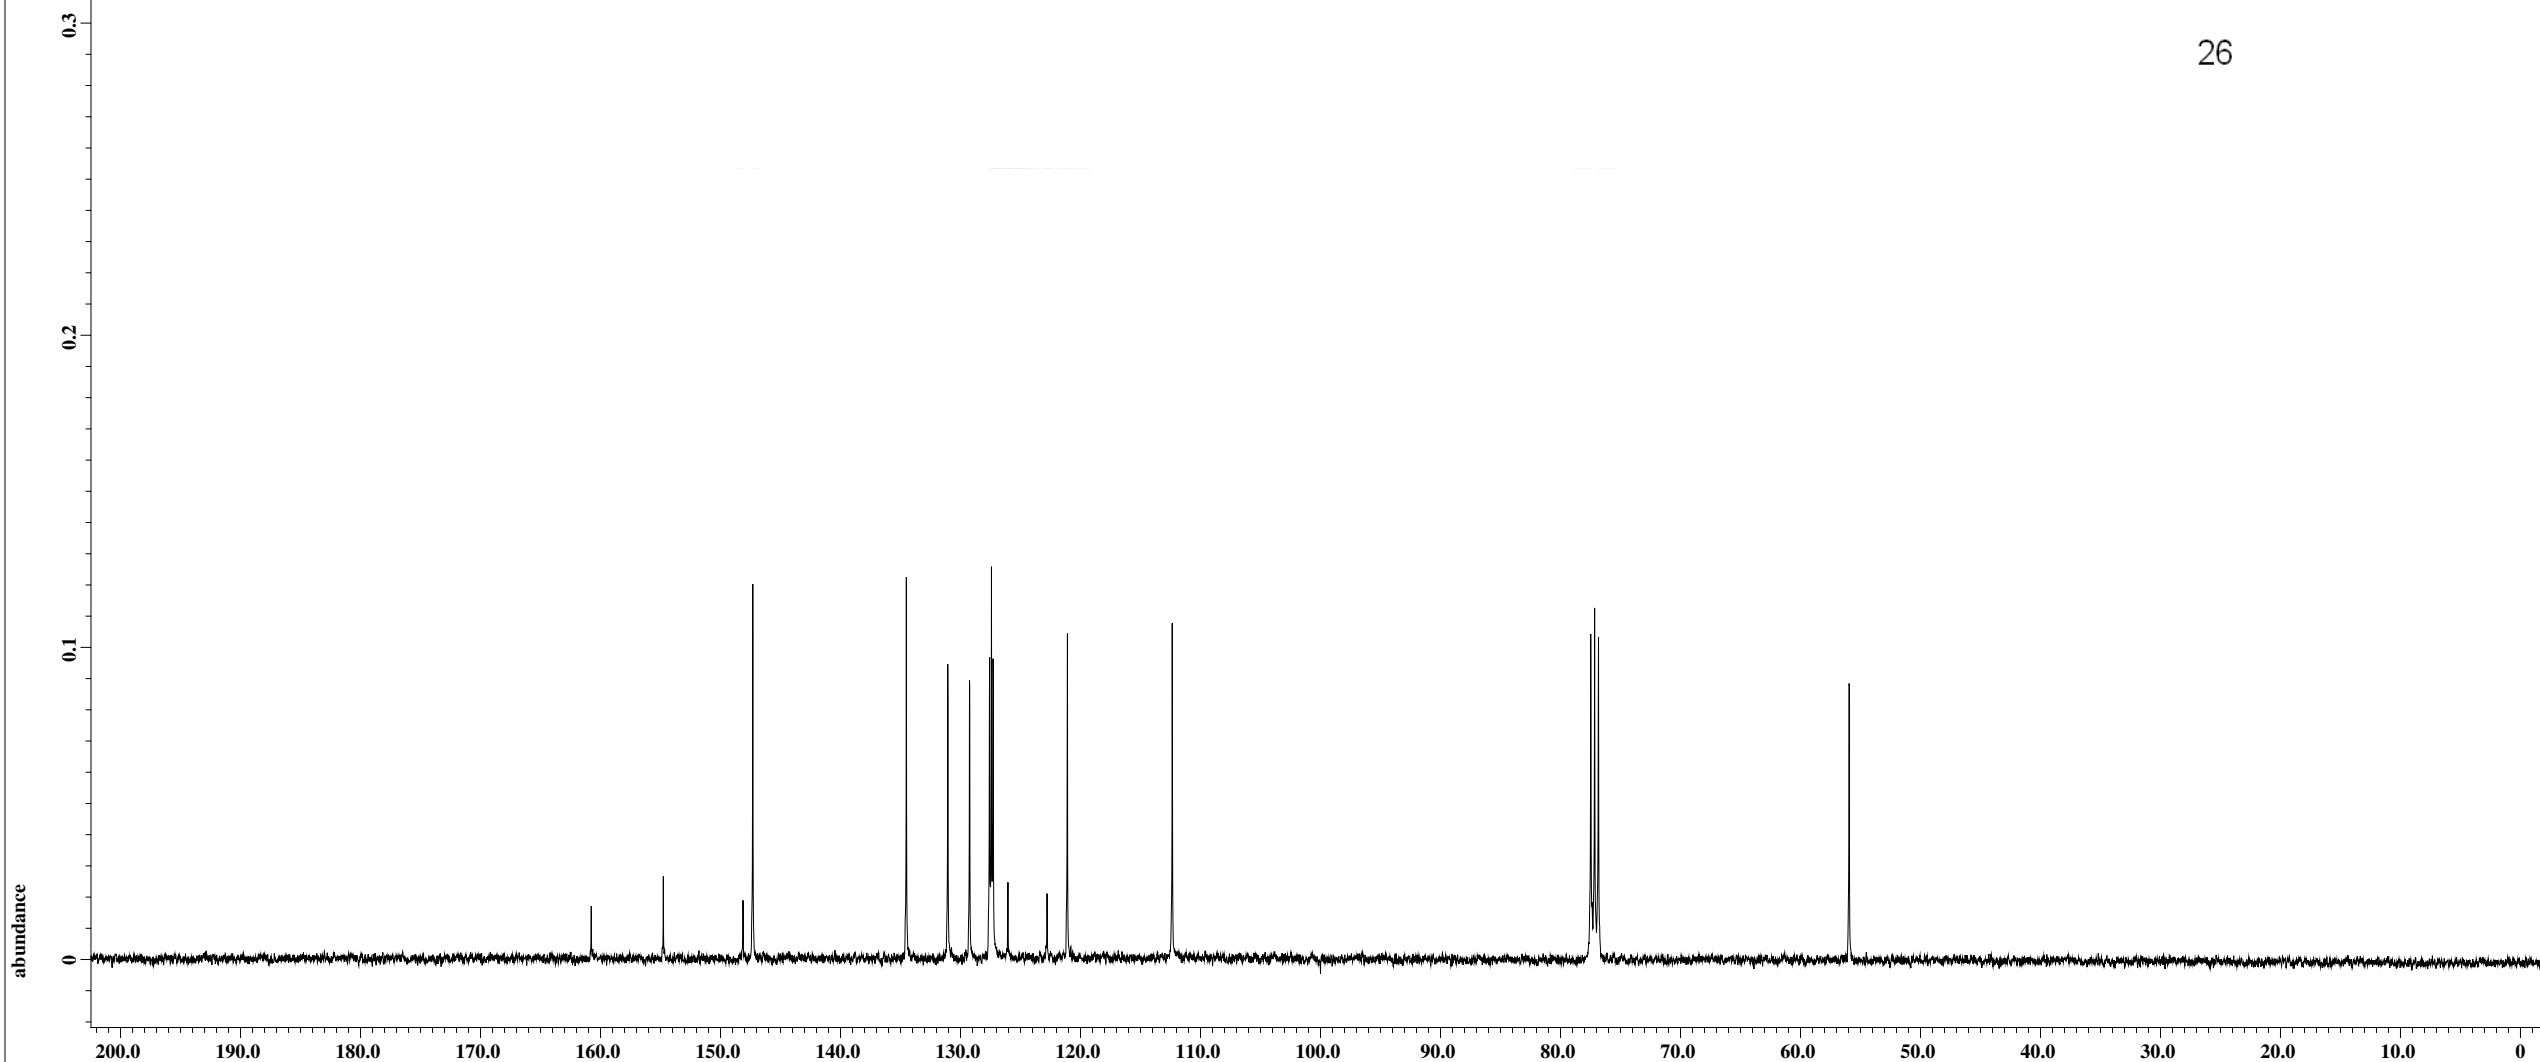

X : parts per Million : 13C



Sample\_id = YWJ1147  
Filename = NMR-2017-04125C-3.jdf  
Creation\_time = 20-JUL-2017 08:53:24  
Site = ECA400  
Experiment = single\_pulse\_dec  
X\_domain = 13C  
Scans = 731  
Temp\_get = 18[dC]  
Solvent = CHLOROFORM-D

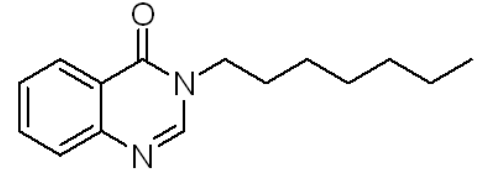

27

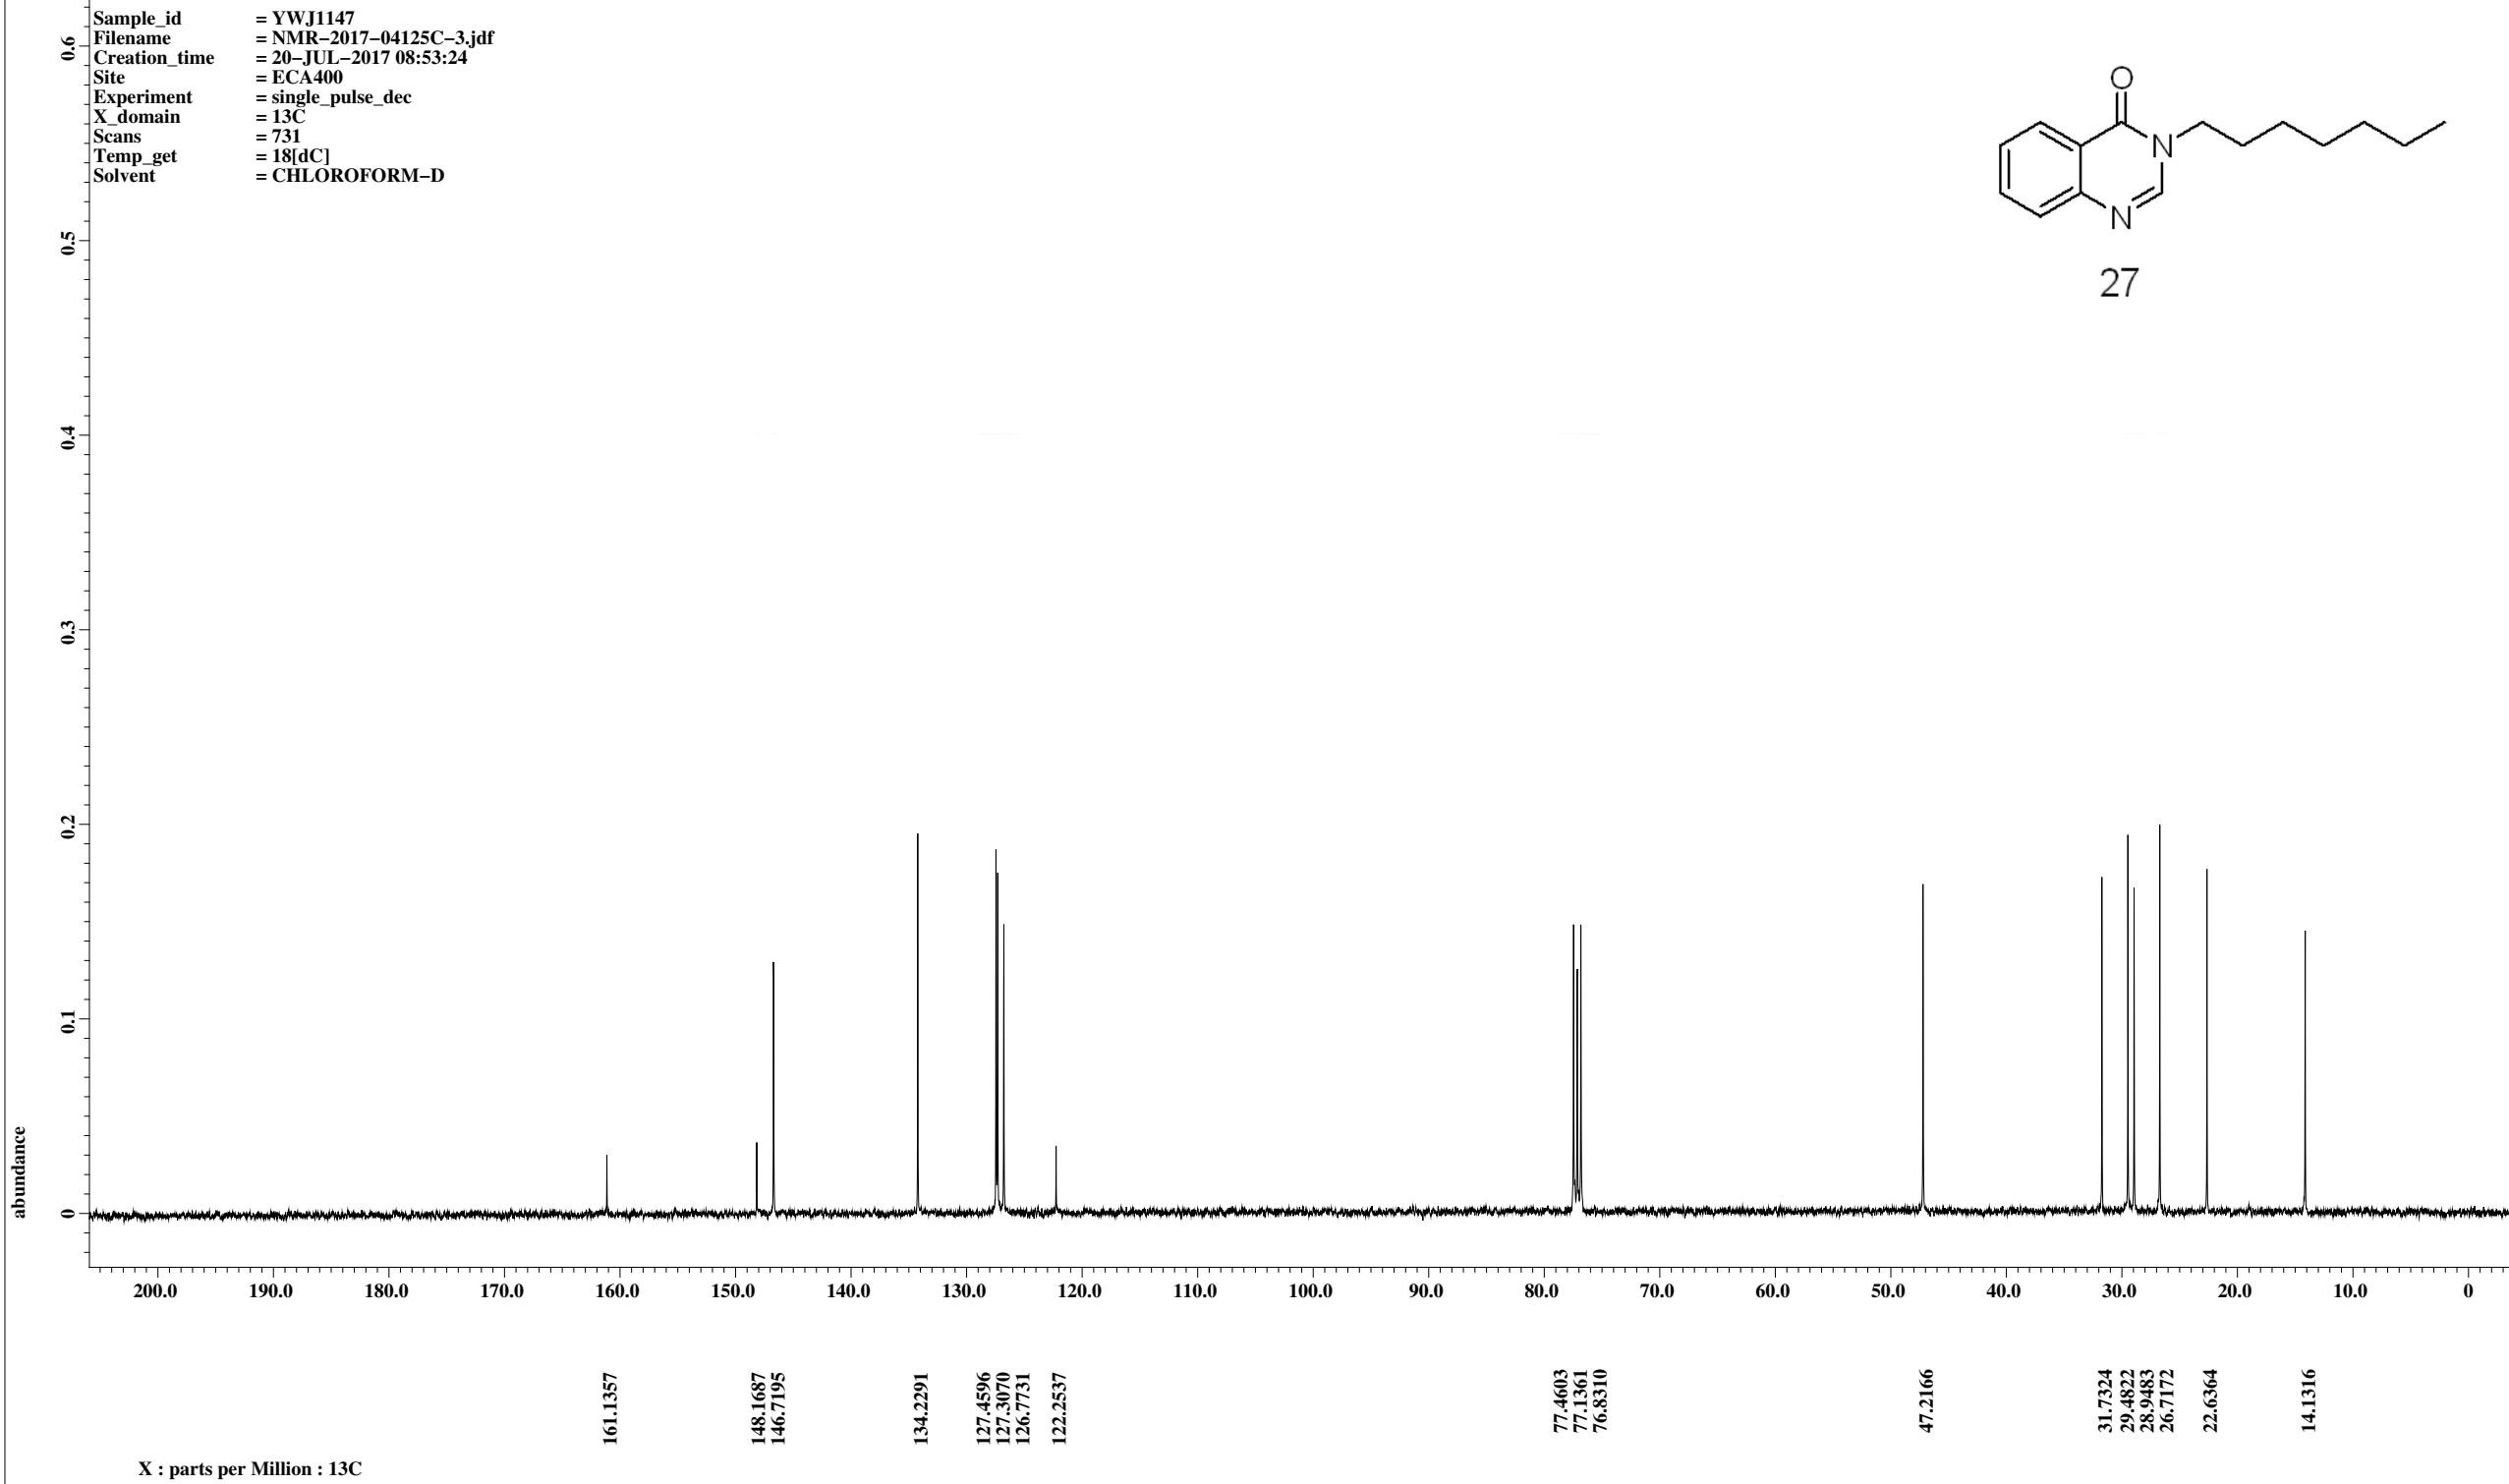

Filename = NMR-2017-05697CB-5.jdf  
Author = Administrator  
Sample\_id = YWJ1424  
Creation\_time = 6-NOV-2017 16:13:49  
Revision\_time = 6-NOV-2017 20:23:10  
Machine = sec  
Inst\_model\_number =  
Inst\_serial\_number =  
Version = 4.3.6 [AIX]

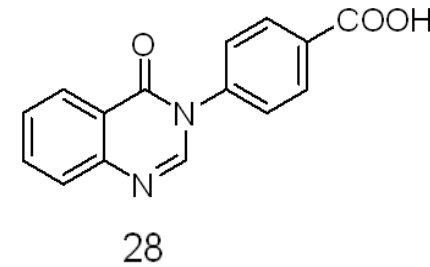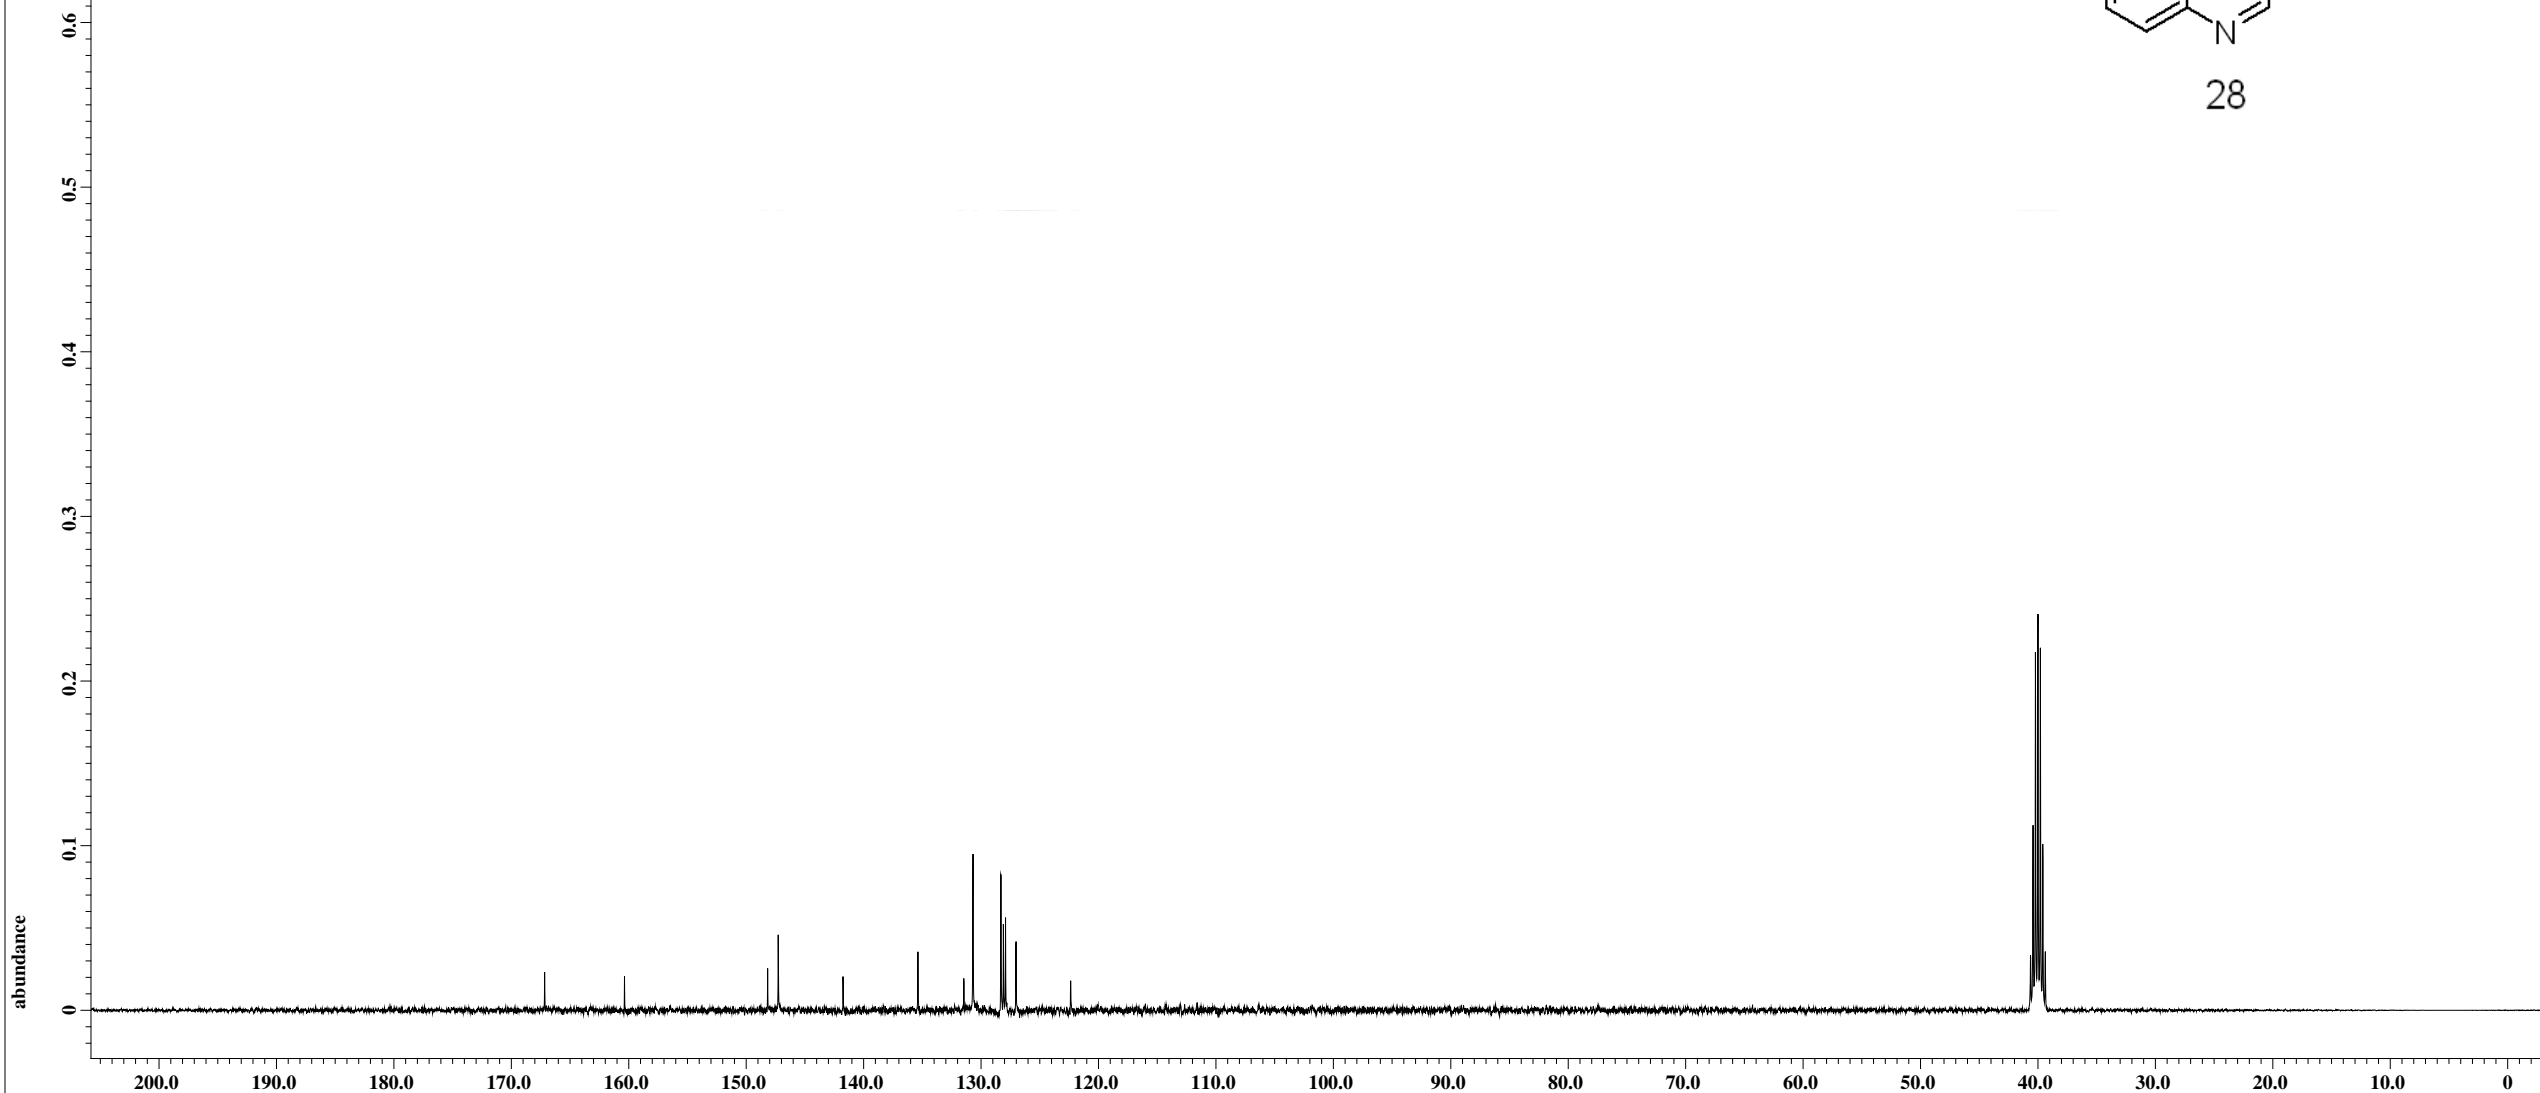

167.1651

160.3639

148.1730

147.2747

141.7567

135.3771

131.4724

130.6841

128.3192

128.0992

127.9159

127.0176

122.3613

40.2147

39.9947

39.7931

X : parts per Million : 13C

Filename = NMR-2017-05326C-3.jdf  
Author = Administrator  
Sample\_id = YWJ1242-2  
Creation\_time = 29-SEP-2017 15:13:16  
Revision\_time = 30-OCT-2017 22:01:13  
Machine = sec  
Inst\_model\_number =  
Inst\_serial\_number =  
Version = 4.3.6 [AIX]

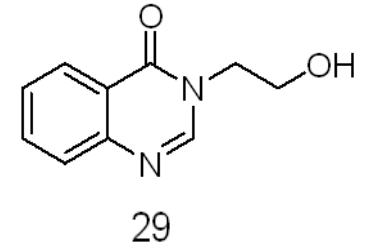

abundance

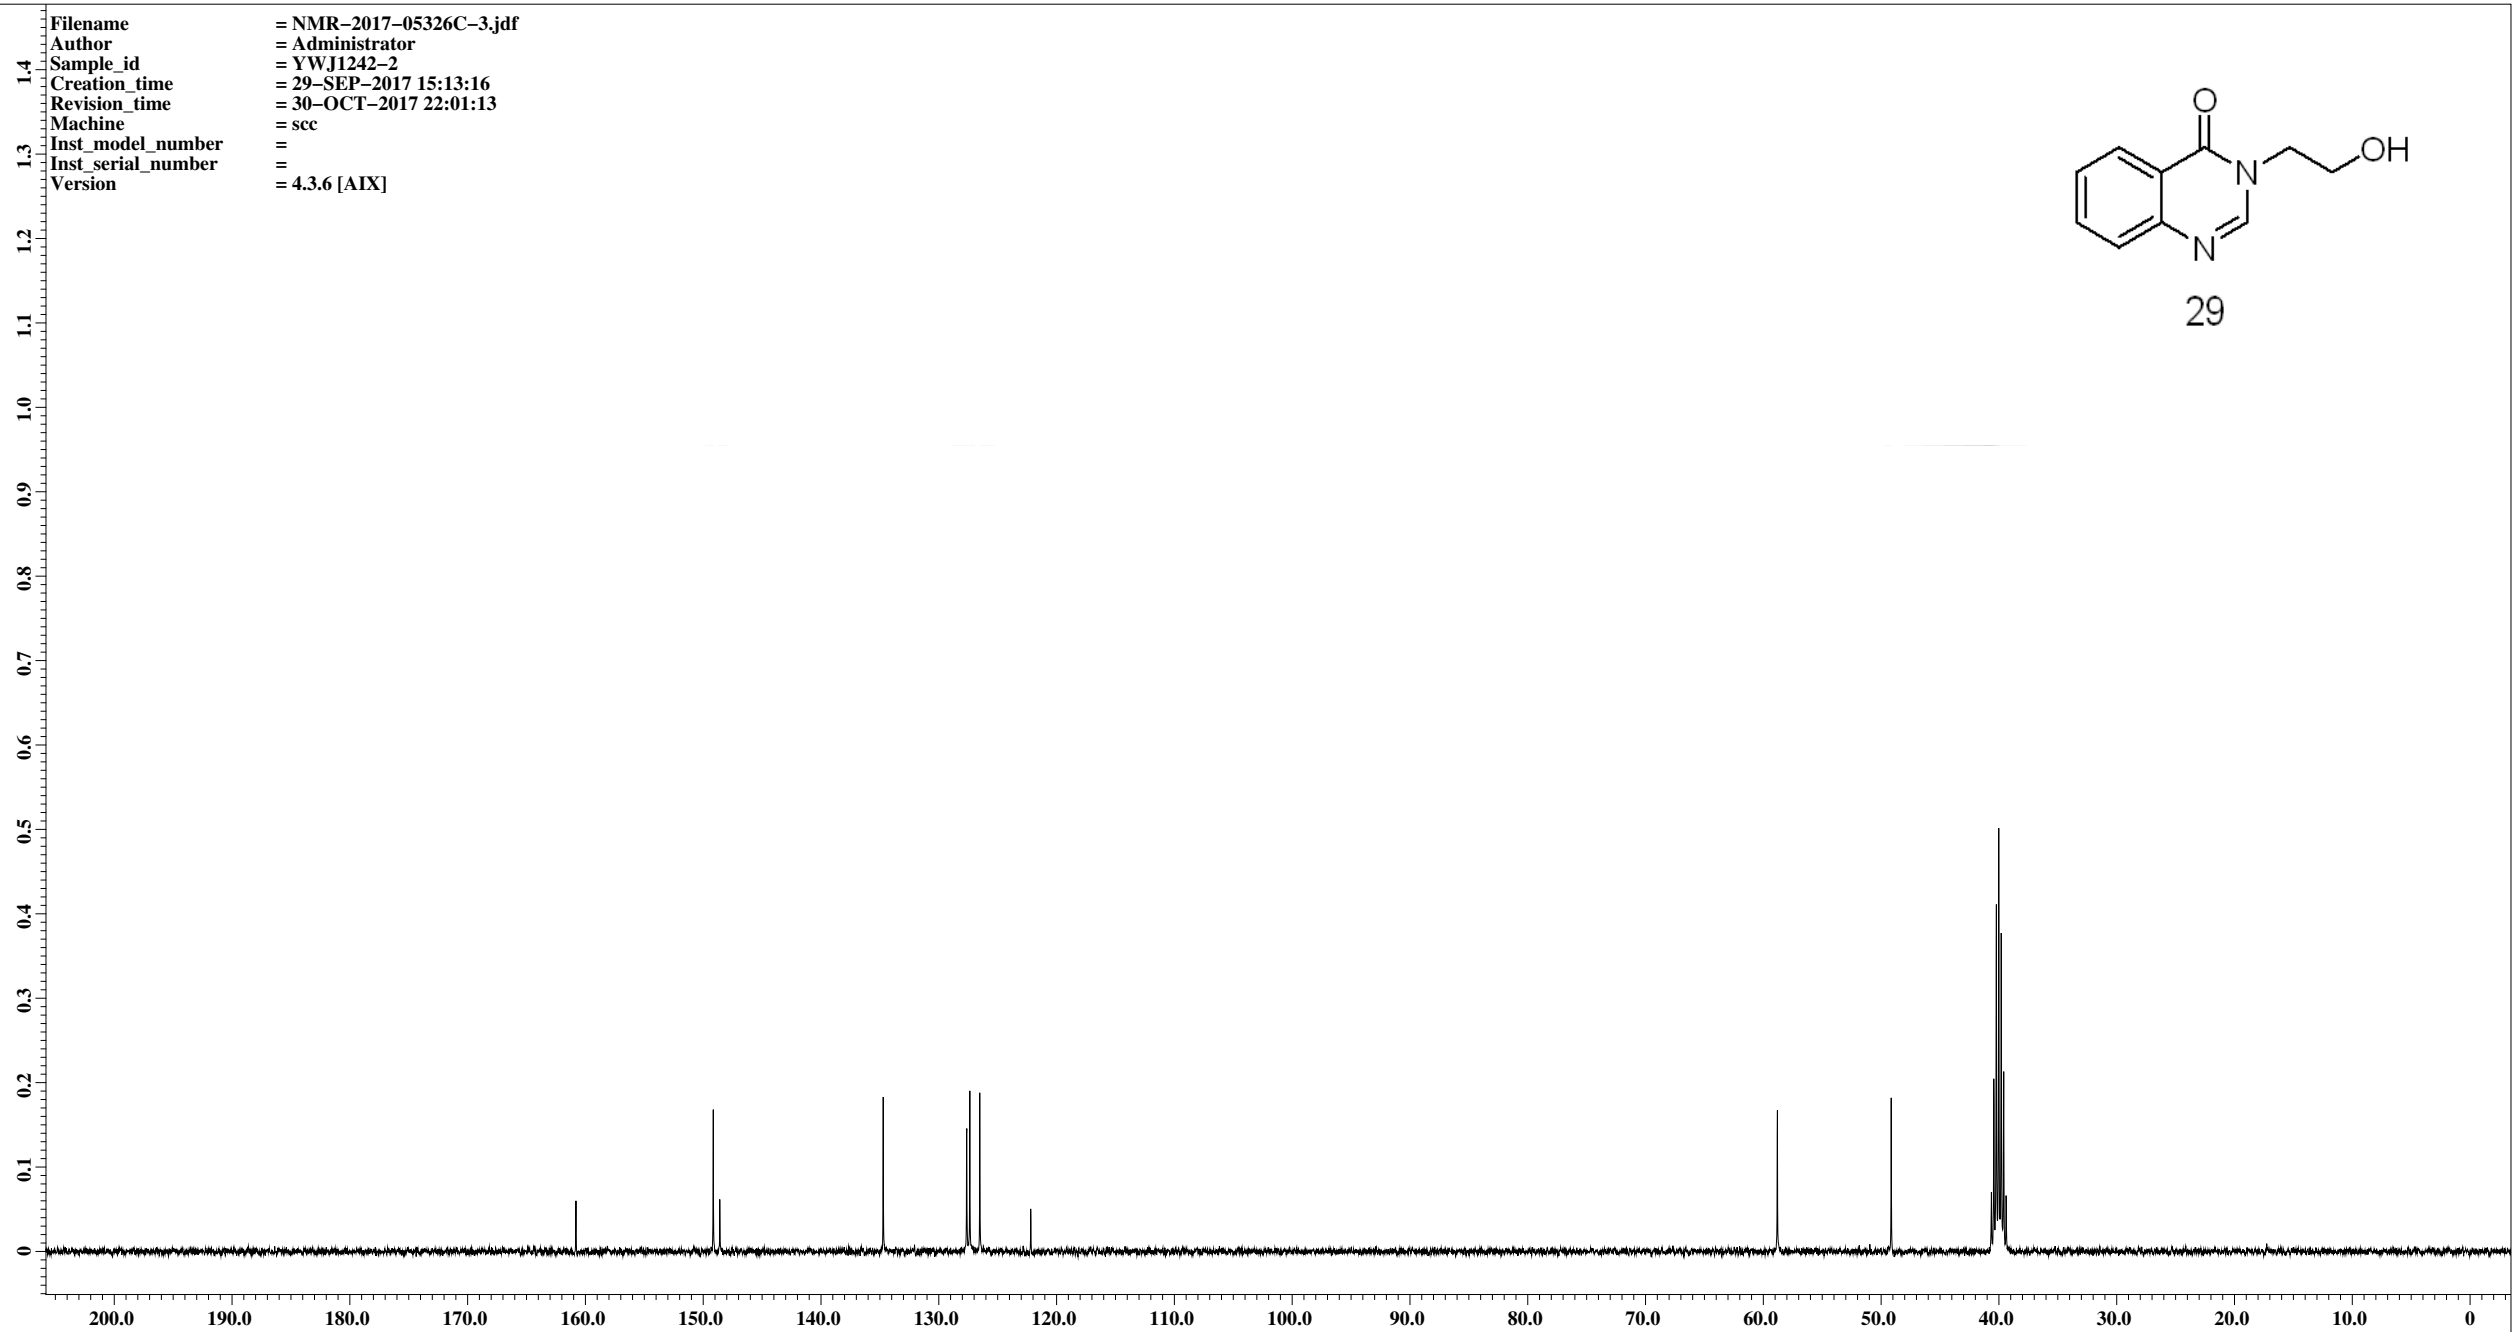

160.8039

149.1446  
148.5946

134.7172

127.6226  
127.3660  
126.5227  
122.1963

58.8036

49.1425  
40.6364  
40.4347  
40.2147  
40.0131  
39.8114  
39.5914  
39.3898

X : parts per Million : 13C

Filename = NMR-2017-05395C-4.jdf  
Author = Administrator  
Sample\_id = YWJ1240  
Creation\_time = 11-OCT-2017 16:07:39  
Revision\_time = 30-OCT-2017 22:02:50  
Machine = scc  
Inst\_model\_number =  
Inst\_serial\_number =  
Version = 4.3.6 [AIX]

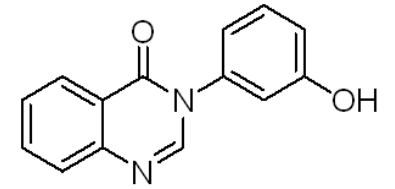

30

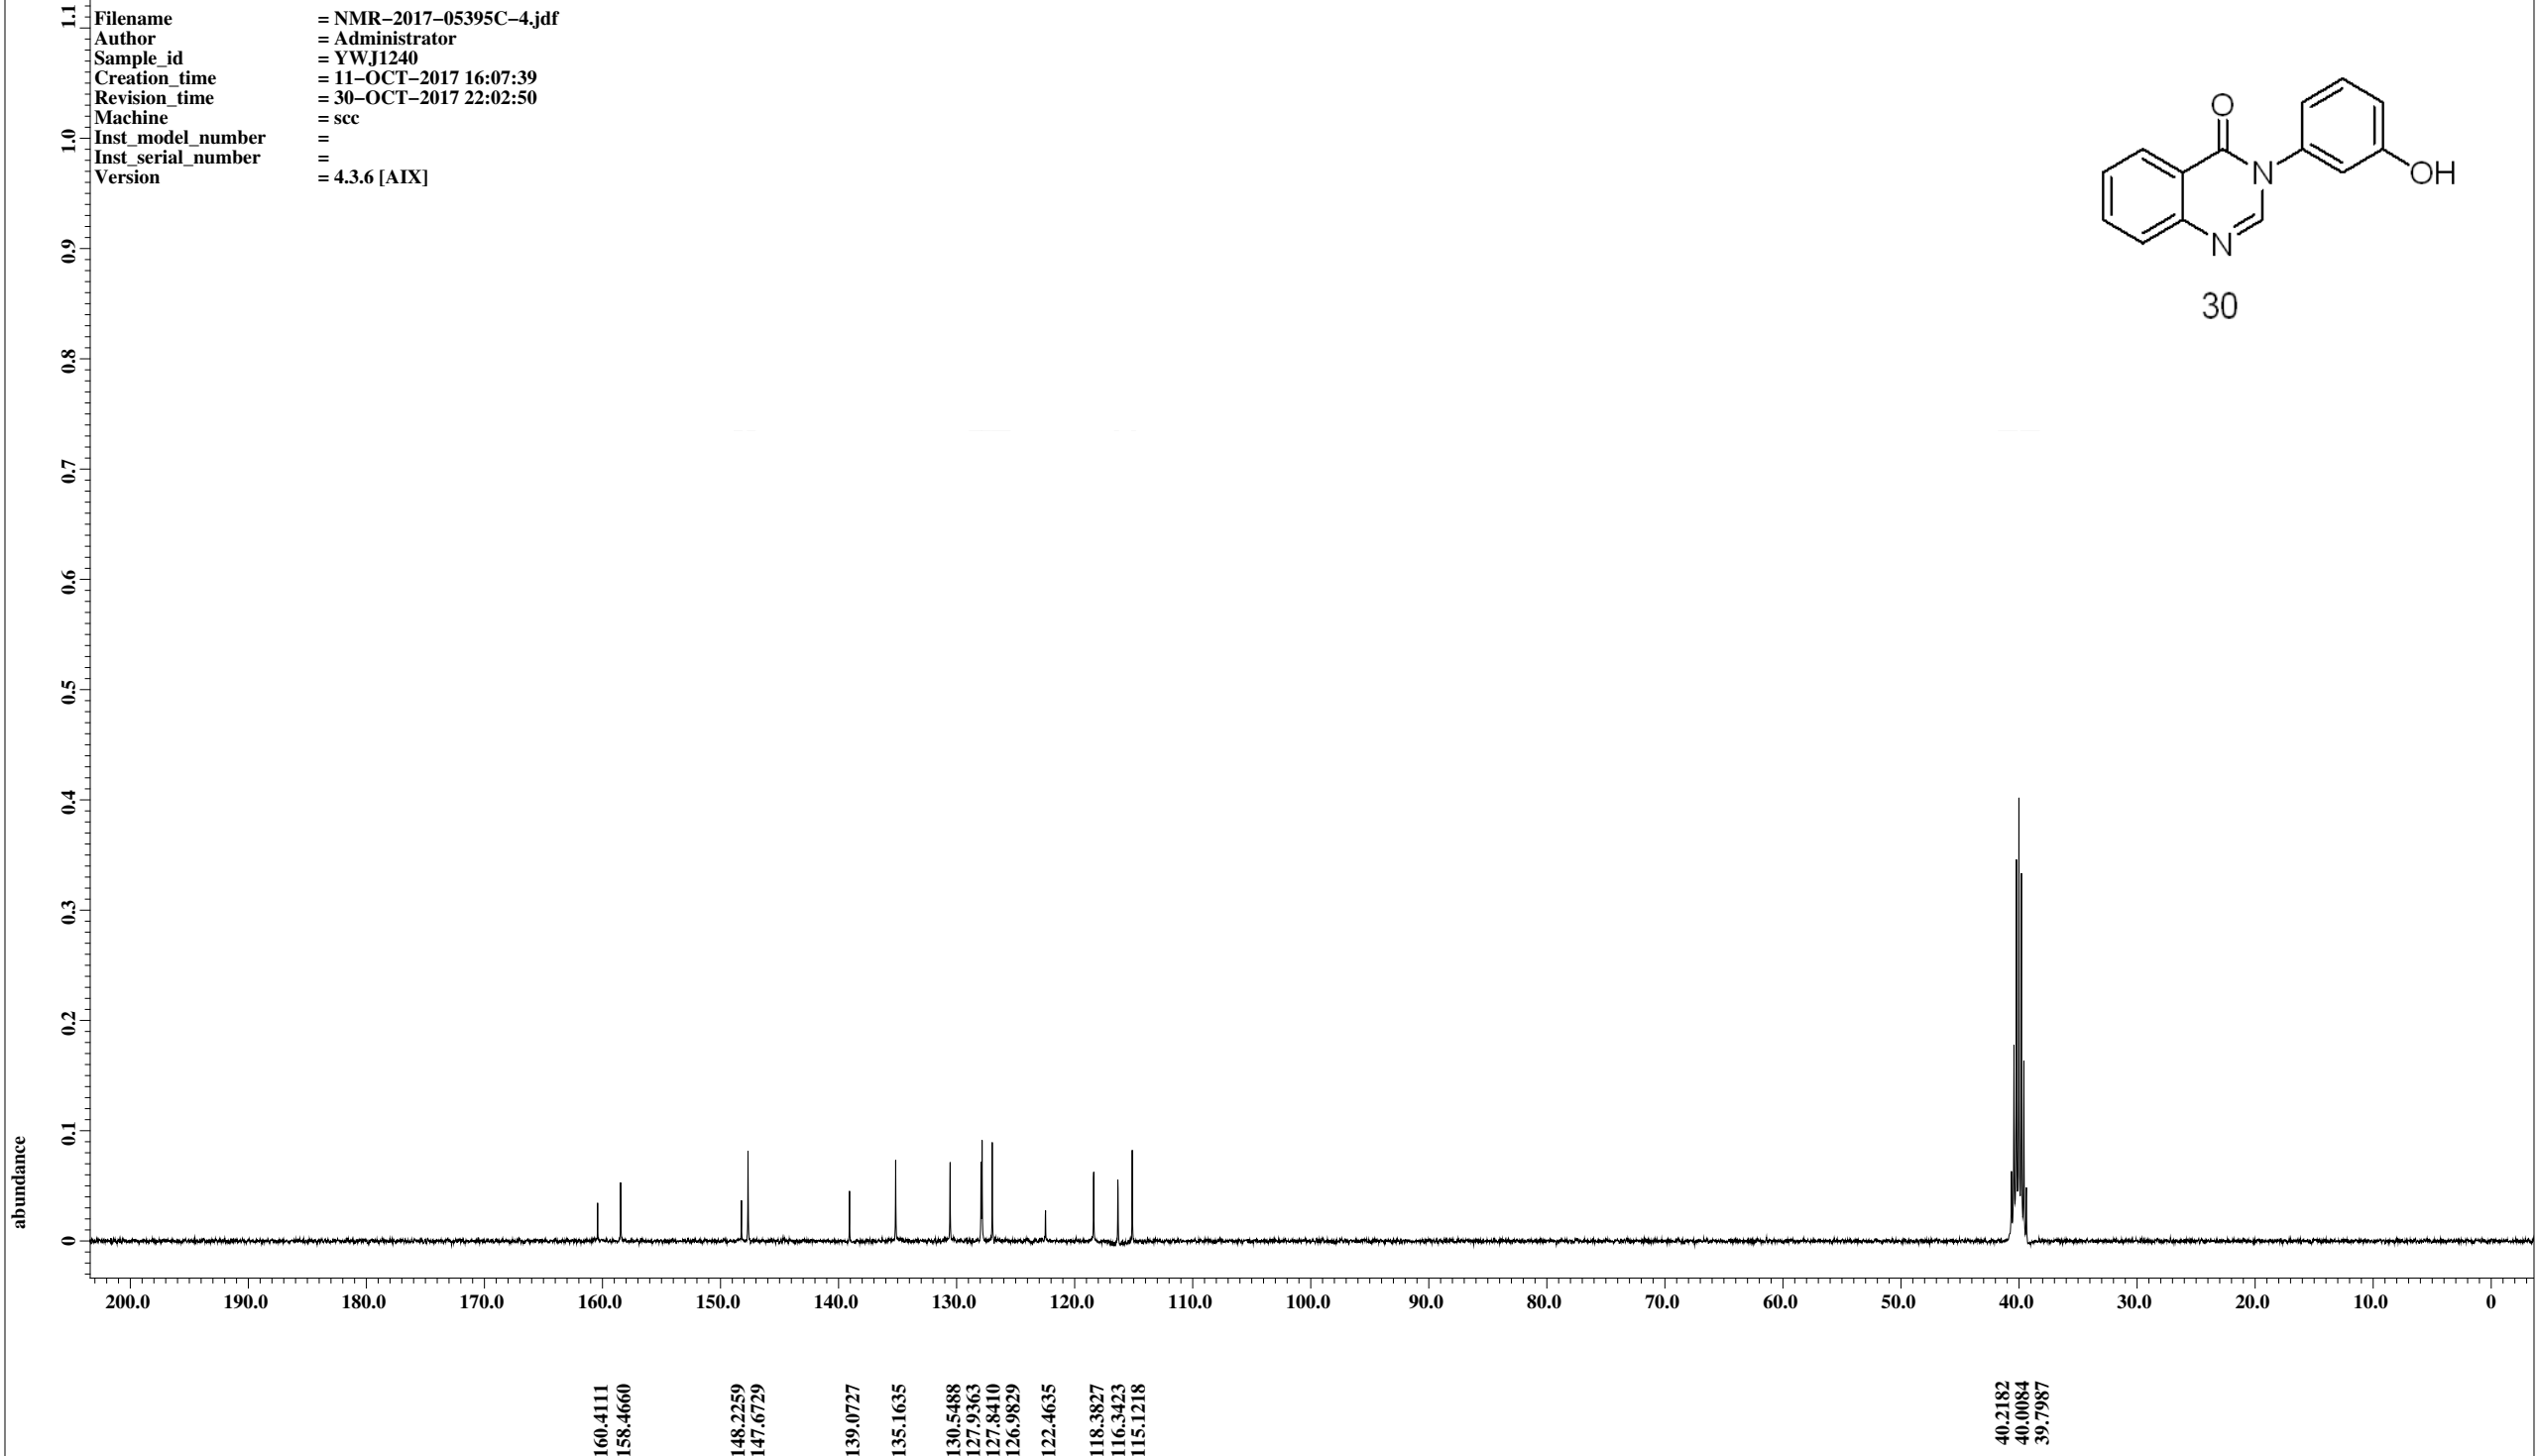

X : parts per Million : 13C

Filename = NMR-2017-05318C-9.jdf  
Author = Administrator  
Sample\_id = YWJ1237  
Creation\_time = 29-SEP-2017 11:21:20  
Revision\_time = 30-OCT-2017 22:06:44  
Machine = scc  
Inst\_model\_number =  
Inst\_serial\_number =  
Version = 4.3.6 [AIX]

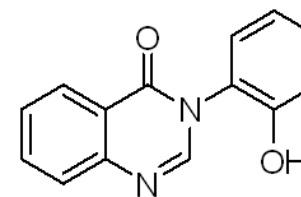

31

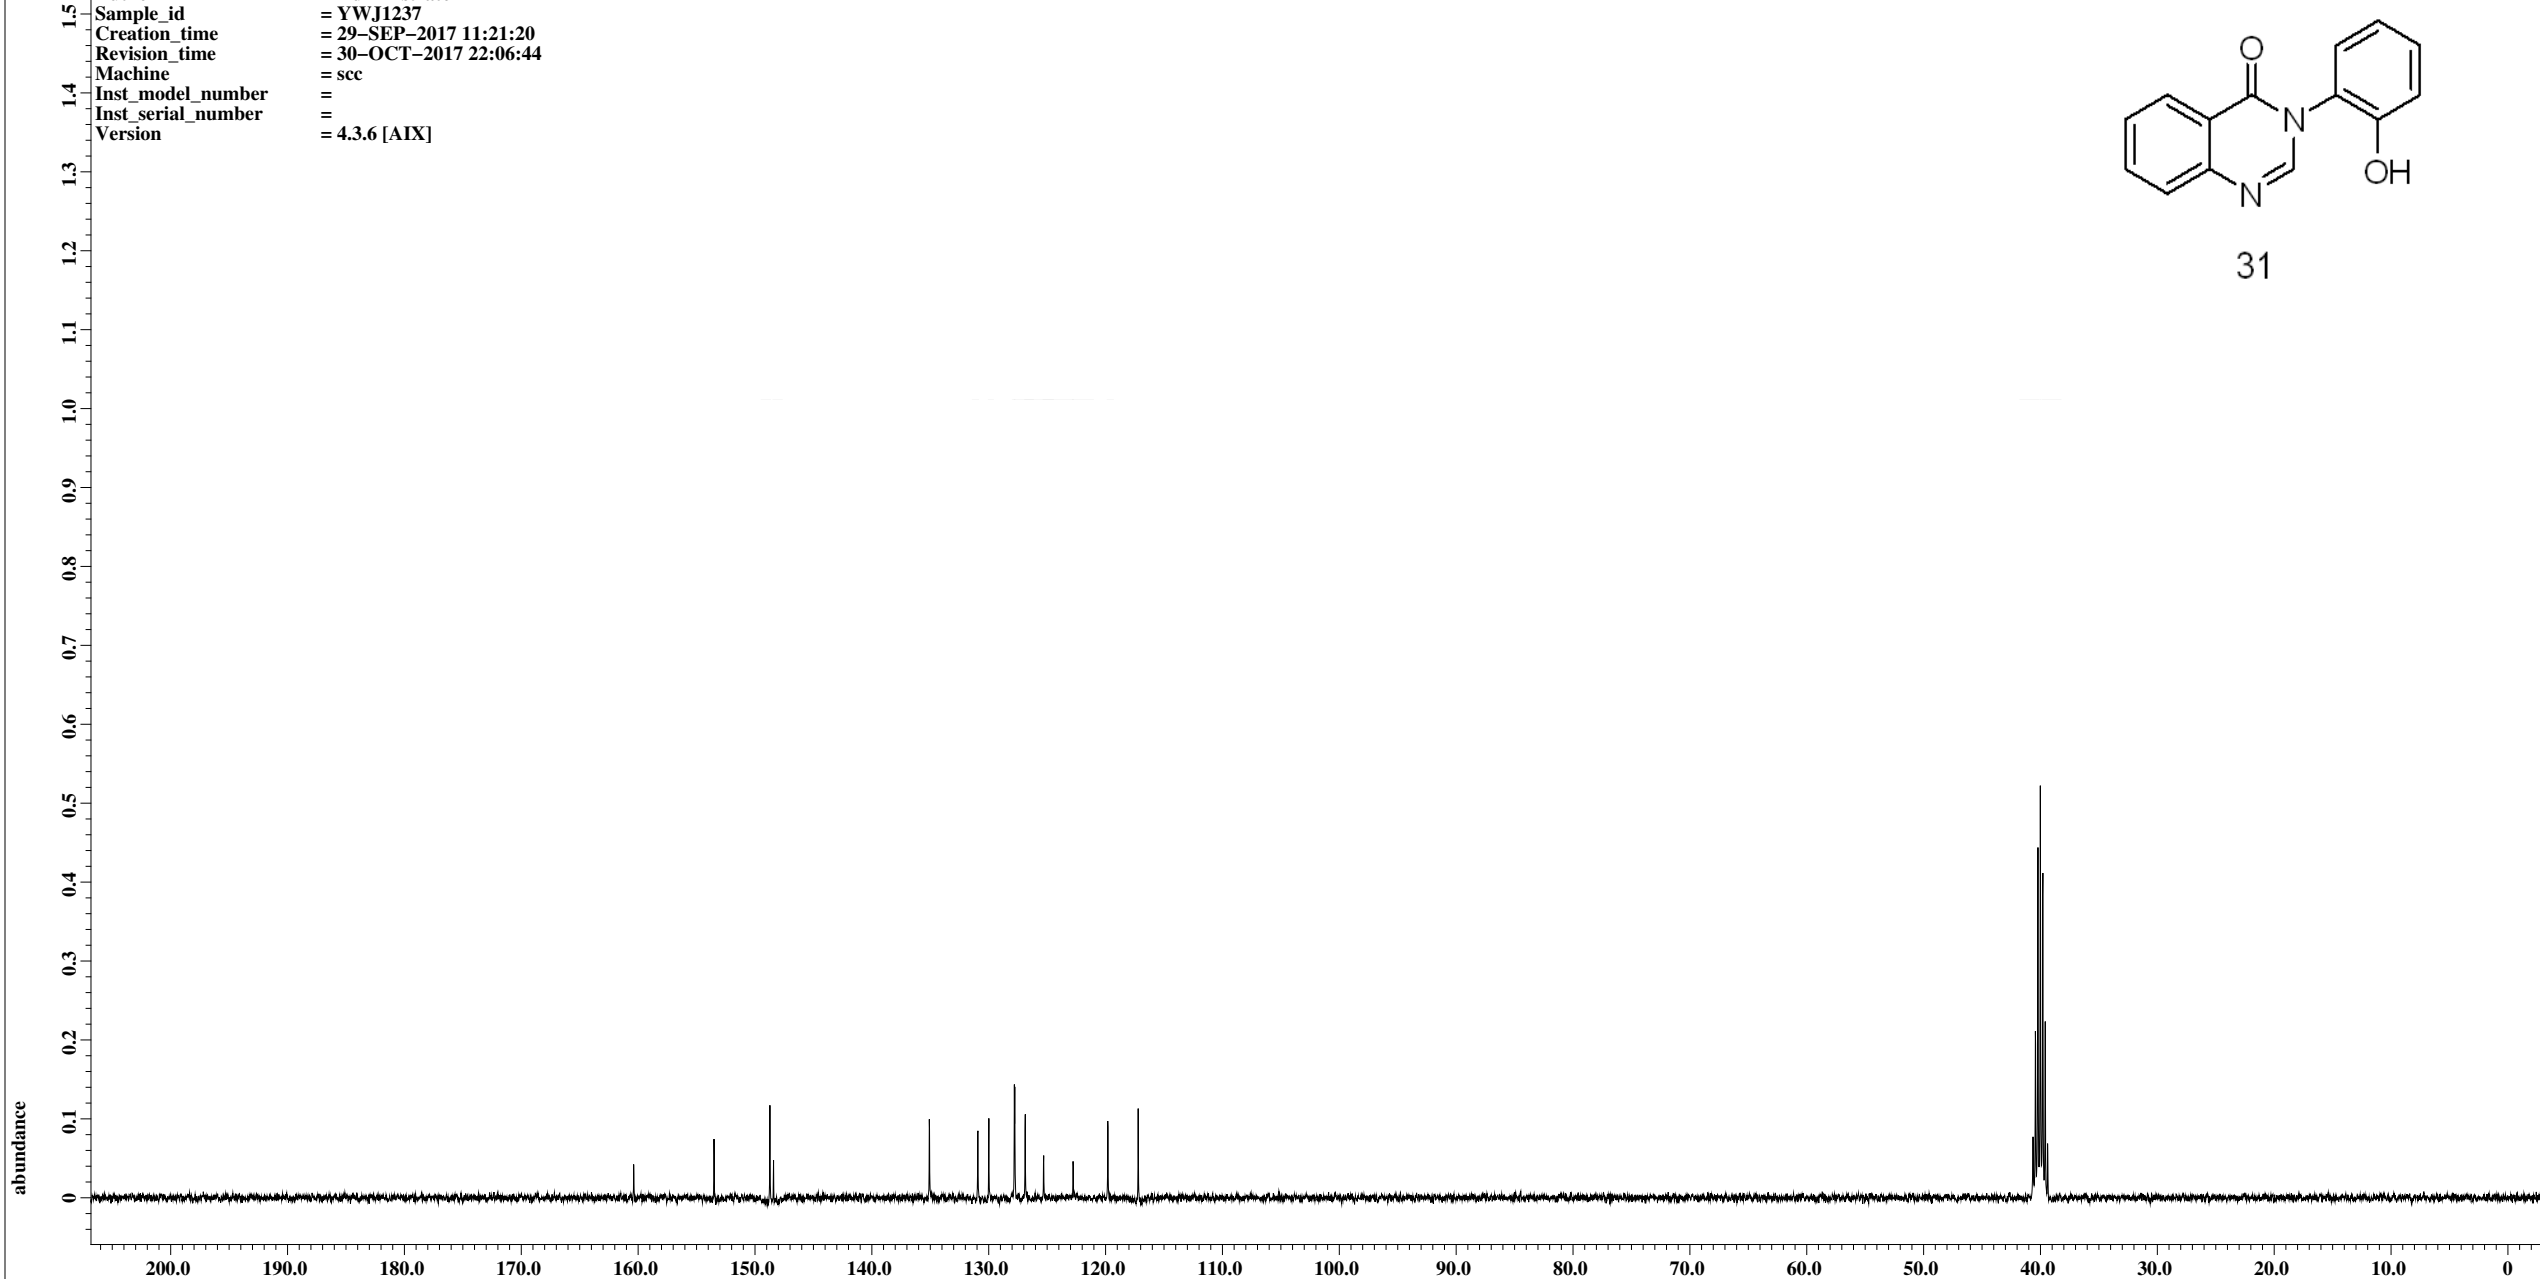

160.3822

153.5077

148.7230

148.4113

135.0838

130.9224

129.9875

127.8059

127.7693

126.8710

125.2944

122.7829

119.8131

117.2099

40.2147

40.0131

39.7931

Sample\_id = YWJ1537  
Filename = NMR-2018-01385C-2.jdf  
Creation\_time = 25-JAN-2018 10:37:06  
Site = ECA400  
Experiment = single\_pulse\_dec  
X\_domain = 13C  
Scans = 236  
Temp\_get = 18.3[dC]  
Solvent = CHLOROFORM-D

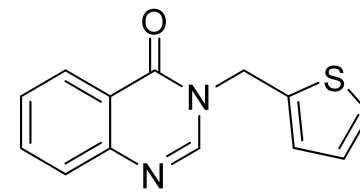

32

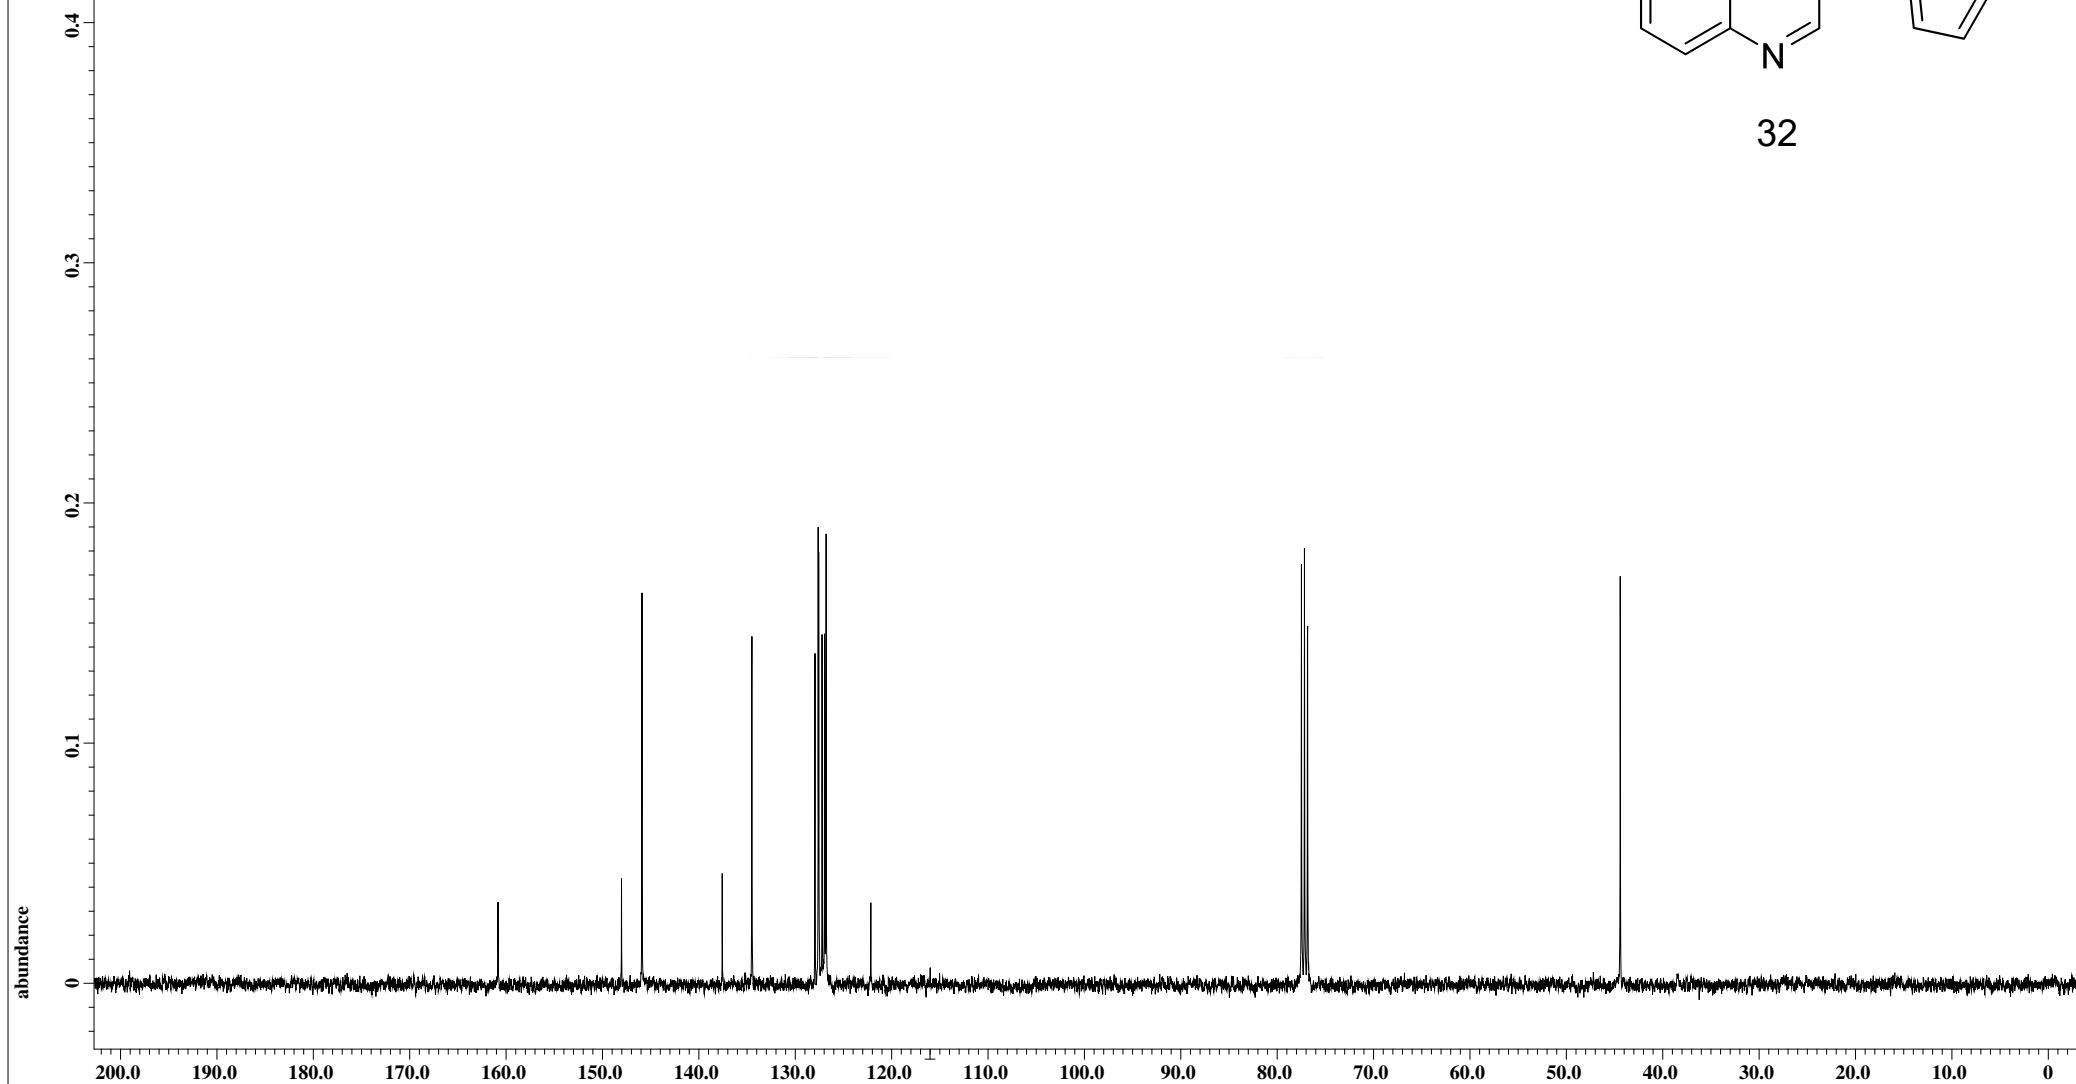

X : parts per Million : 13C

Sample\_id = YWJ1540  
Filename = NMR-2018-01423C-3.jdf  
Creation\_time = 29-JAN-2018 11:57:59  
Site = ECA400  
Experiment = single\_pulse\_dec  
X\_domain = 13C  
Scans = 1319  
Temp\_get = 25[dC]  
Solvent = CHLOROFORM-D

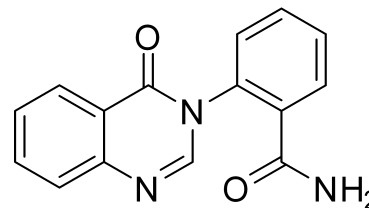

33

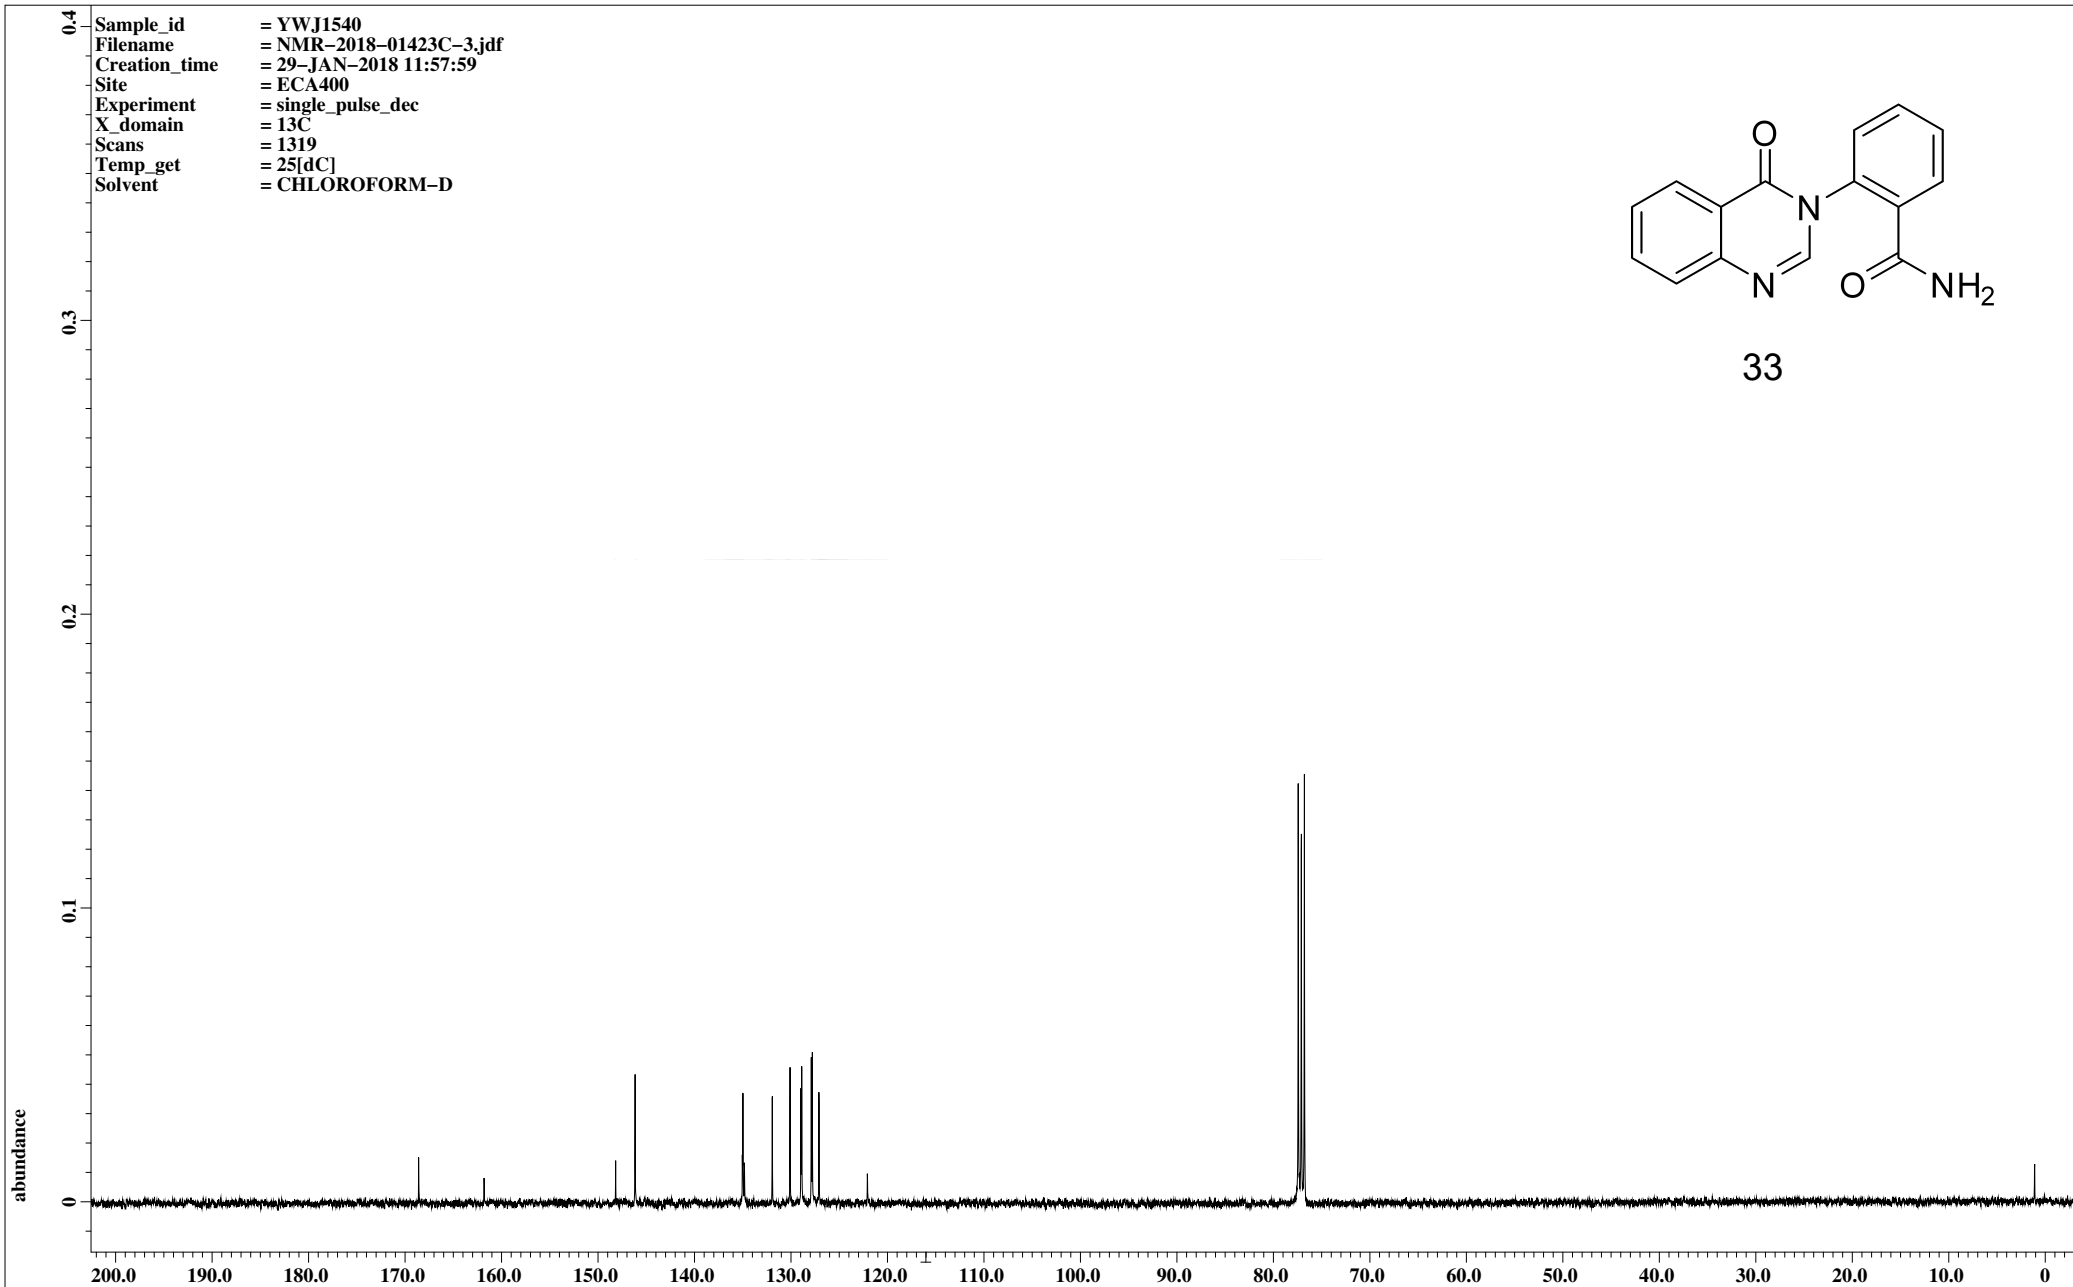

168.60

161.81

148.17

146.16

134.99

134.83

131.93

130.10

128.96

128.89

127.90

127.79

127.11

122.09

77.43

77.10

76.79

X : parts per Million : 13C

Sample\_id = YWJ7028  
Filename = NMR-2017-04239C-3.jdf  
Creation\_time = 28-JUL-2017 09:09:26  
Site = ECA400  
Experiment = single\_pulse\_dec  
X\_domain = 13C  
Scans = 701  
Temp\_get = 18.4[dC]  
Solvent = CHLOROFORM-D

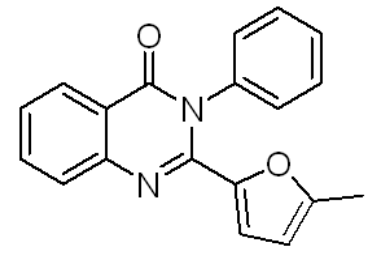

34

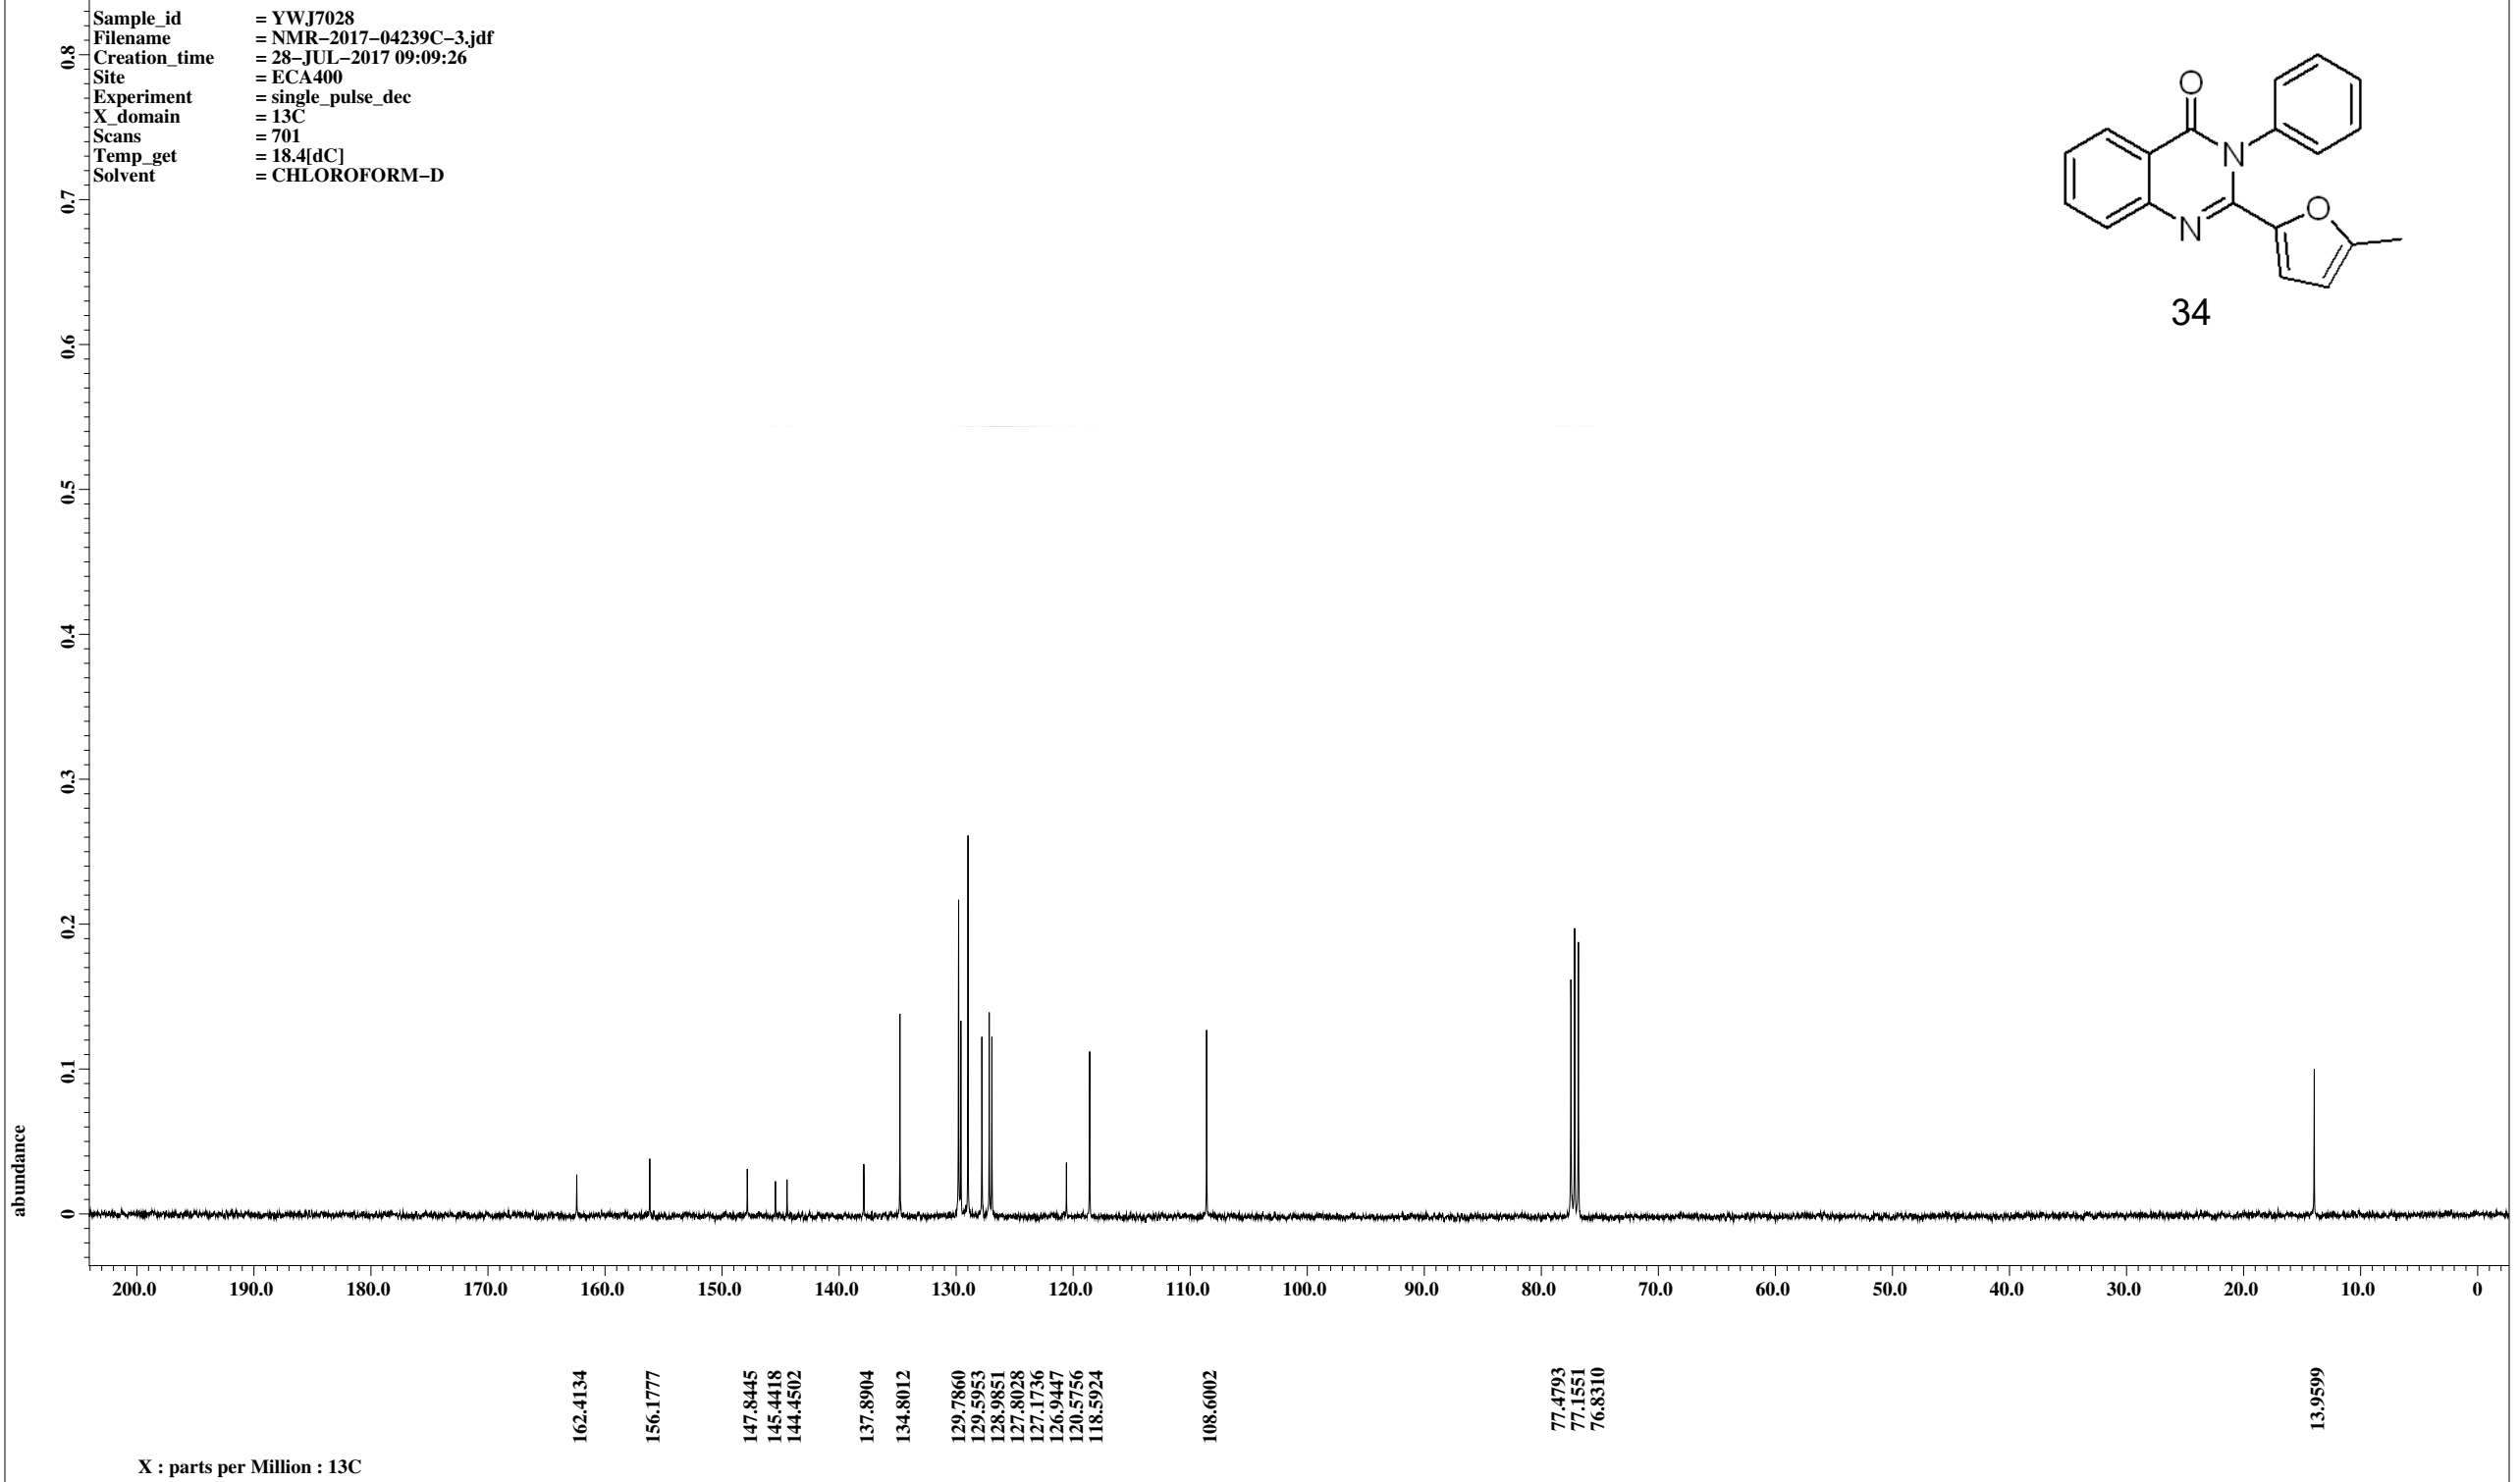

Supplement: c8gc00079d1.pdf [file c8gc00079d1.pdf]
